# Supplementary material for: Shared neutrophil and T cell dysfunction is accompanied by a distinct interferon signature during severe febrile illnesses in children
Source: Springer Nature journal article supplement (doi:10.1038/s41467-024-52246-0), 2024-09-19
Supplement: MOESM1 [file 41467_2024_52246_MOESM1_ESM.pdf]

## SUPPLEMENTARY INFORMATION

**Supplementary Table 1:** Demographic features and COVID-19 vaccination details of healthy adult controls

**Supplementary Table 2:** Clinical, demographic and laboratory features of children included in the Transcriptomic Cohort.

**Supplementary Table 3:** Clinical characteristics of patients included in the mass cytometry experiments.

**Supplementary Table 4.** Clinical characteristics of children within Cluster 1 and Cluster 2 as defined by immunophenotyping using mass cytometry data.

**Supplementary Table 5.** Summary of supernatant cytokine analysis following cell stimulation experiments.

**Supplementary Table 6.** Clinical characteristics of patients and controls included in the cell stimulation mass cytometry experiment.

**Supplementary Table 7.** Strobe Checklist

**Supplementary Figure 1.** Duration of prior fever, admission to wards and paediatric intensive care units (PICU) and convalescence relative to sampling at T1, T2 and T3 for individual patients grouped by their severe febrile illness (all patients recruited to the study).

**Supplementary Figure 2.** Upset plot visualizing counts of patients/controls across different assays.

**Supplementary Figure 3.** Mass cytometry methods

**Supplementary Figure 4. Immune cell populations and expression of markers by mass cytometry.** **a**, Heatmaps displaying hierarchical clustering of immune cell populations from manually gated mass cytometry data in children with acute (time point 1, T1) multisystem inflammatory syndrome in children (MIS-C, n=35), severe bacterial infection (SBI, n=17), severe viral infection (SVI, n=10), Kawasaki disease (KD, n=4) and healthy paediatric controls (HPC, n=10). **b**, Heatmaps displaying hierarchical clustering of immune cell populations from manually gated mass cytometry data in children with MIS-C at time point 1 (T1, acute febrile within 48 hours of admission, n=35), time point 2 (T2, defervescence with CRP concentration <100 mg/l, n=16) and timepoint 3 (T3, convalescence at follow-up clinic, n=26) and healthy paediatric controls (n=10). **c**, Heatmaps displaying hierarchical clustering of immune cell populations from manually gated mass cytometry data in children with severe bacterial infection (SBI) at time point 1 (T1, acute febrile within 48 hours of admission, n=17), time point 2 (T2, defervescence with CRP concentration <100 mg/l, n=8) and timepoint 3 (T3, convalescence at follow-up clinic, n=6) and healthy paediatric controls (n=10).

**Supplementary Figure 5.** Hierarchical clustering for children with no immunomodulation at T1 sampling.

**Supplementary Figure 6.** MOFA of immune features from immunophenotyping shows differences between disease groups and key factors of protein expression and cell proportion features in acute (T1) disease and over the trajectory of illness.

**Supplementary Figure 7.** Factors 1-3 by disease groups and timepoints.

**Supplementary Figure 8.** Markers of immune cell activation and return to baseline in innate immune cells (mature neutrophils, immature neutrophils, monocytes, myeloid DCs, plasmacytoid DCs, CD4 memory T cells, CD8 memory T cells, memory regulatory T cells). For all figures, patients with MIS-C are represented in shades of purple for T1–T3 and patients with SBI are represented with shades of orange for T1–T3. P values for pairwise-comparisons across time are using Wilcoxon rank sum testing.

**Supplementary Figure 9. a,** Markers of T cell activation, exhaustion and apoptosis in memory CD4 T cells. **b,** Markers of T cell activation, exhaustion and apoptosis in memory CD8 T cells. **c,** Markers of T cell activation, exhaustion and apoptosis in memory regulatory T cells.

**Supplementary Figure 10.** Co-expression of CD279 PD1 with markers of activation, exhaustion and apoptosis in CD4 memory T cells. Representative examples of CD279 PD-1 expression (x axis, all plots) versus **a,** HLA-DR; **b,** CD38; **c,** CD152 CTLA4; **d,** CD134 OX40, **e,** CD278 ICOS, **f,** CD95 Fas, **g,** intracellular IFN $\gamma$  in memory CD4 T cells and naïve/effector CD4 T cells.

**Supplementary Figure 11.** K-means clustering analysis: effects of immunomodulatory treatment on supernatant cytokines.

**Supplementary Figure 12.** Supernatant cytokine analysis 1: interferons.

**Supplementary Figure 13.** Supernatant cytokine analysis 2: remaining cytokines.

**Supplementary Figure 14.** Supernatant cytokine sub-analysis of MIS-C T1 by clusters identified on mass cytometry.

**Supplementary Figure 15.** Heatmap summarising mass cytometry results of stimulated samples.

**Supplementary Figure 16.** Gene set enrichment analysis (GSEA) results. **a,** children with MIS-C (TP1) versus pediatric healthy controls; **b,** children with definite bacterial infection (TP1) versus pediatric healthy controls; **c,** children with definite viral infection (TP1) versus pediatric healthy controls; **d,** children with MIS-C versus children with definite bacterial infection. GSEA was undertaken in the R statistical environment, using pathways annotated by the Gene Ontology (GO) database.

**DIAMONDS Consortium Membership**

**Supplementary Table 1:** Demographic features and COVID-19 vaccination details of healthy adult controls

| Participant ID           | Sex    | Age (years) | Self-reported ethnicity | Date of sample | COVID-19 vaccine received                              | Date of vaccination         | Dose of last vaccine prior to sampling |
|--------------------------|--------|-------------|-------------------------|----------------|--------------------------------------------------------|-----------------------------|----------------------------------------|
| Healthy adult control 1  | Male   | > 21        | North/Mid/East European | 06/07/2021     | mRNA Vaccine BNT162b2                                  | 10/03/2021                  | Second                                 |
| Healthy adult control 2  | Female | > 21        | North/Mid/East European | 06/07/2021     | mRNA Vaccine BNT162b3                                  | 21/04/2021                  | Second                                 |
| Healthy adult control 3  | Female | > 21        | North/Mid/East European | 06/07/2021     | mRNA Vaccine BNT162b4                                  | 04/03/2021                  | Second                                 |
| Healthy adult control 4  | Female | > 21        | South Asian             | 06/07/2021     | mRNA Vaccine BNT162b5                                  | 07/04/2021                  | Second                                 |
| Healthy adult control 5  | Female | > 21        | North/Mid/East European | 13/07/2021     | mRNA Vaccine BNT162b6                                  | 13/04/2021                  | Second                                 |
| Healthy adult control 6  | Male   | > 21        | North/Mid/East European | 13/07/2021     | mRNA Vaccine BNT162b7                                  | 16/03/2021                  | Second                                 |
| Healthy adult control 7  | Male   | > 21        | North/Mid/East European | 13/07/2021     | Non-replicating viral vector vaccine AZD1222 (ChAdOx1) | 20/05/2021                  | Second                                 |
| Healthy adult control 8  | Male   | > 21        | African - other         | 13/07/2021     | mRNA Vaccine BNT162b4                                  | 31/03/2021                  | Second                                 |
| Healthy adult control 9  | Female | > 21        | North/Mid/East European | 13/07/2021     | mRNA Vaccine BNT162b4                                  | 01/07/2021                  | Second                                 |
| Healthy adult control 10 | Female | > 21        | North/Mid/East European | 14/07/2021     | mRNA Vaccine BNT162b4                                  | 20/03/2021                  | Second                                 |
| Healthy adult control 11 | Male   | > 21        | South American - other  | 14/07/2021     | mRNA Vaccine BNT162b4                                  | 12/05/2021                  | Second                                 |
| Healthy adult control 12 | Male   | > 21        | North/Mid/East European | 15/07/2021     | mRNA Vaccine BNT162b4                                  |                             |                                        |
| Healthy adult control 13 | Male   | > 21        | North/Mid/East European | 22/07/2021     | mRNA Vaccine BNT162b4                                  | 10/03/2021                  | Second                                 |
| Healthy adult control 14 | Male   | > 21        | North/Mid/East European | 22/07/2021     | Non-replicating viral vector vaccine AZD1222 (ChAdOx1) | 24/06/2021                  | Second                                 |
| Healthy adult control 15 | Female | > 21        | North/Mid/East European | 03/02/2021     | mRNA Vaccine BNT162b4                                  | 04/01/2021                  | First                                  |
| Healthy adult control 16 | Female | > 21        | North/Mid/East European | 05/02/2021     | mRNA Vaccine BNT162b4                                  | 01/01/2021                  | First                                  |
| Healthy adult control 17 | Female | > 21        | East Asian              | 06/10/2021     | mRNA Vaccine BNT162b4                                  | 19/03/2021                  | Second                                 |
| Healthy adult control 18 | Female | > 21        | North/Mid/East European | 06/10/2021     | mRNA Vaccine BNT162b4                                  | 22/03/2021                  | Second                                 |
| Healthy adult control 19 | Male   | > 21        | South American - other  | 06/10/2021     | mRNA Vaccine BNT162b4                                  | 26/08/2021                  | Second                                 |
| Healthy adult control 20 | Female | > 21        | North/Mid/East European | 06/10/2021     | mRNA Vaccine BNT162b4                                  | 10/04/2021                  | Second                                 |
| Healthy adult control 21 | Female | > 21        | North/Mid/East European | 26/11/2021     | mRNA Vaccine BNT162b4                                  | 07/10/2021                  | Booster                                |
| Healthy adult control 22 | Male   | > 21        | North/Mid/East European | 26/11/2021     | mRNA Vaccine BNT162b4                                  | 02/10/2021                  | Booster                                |
| Healthy adult control 23 | Male   | > 21        | South Asian             | 26/11/2021     | mRNA Vaccine BNT162b4                                  | 04/05/2021                  | Second                                 |
| Healthy adult control 24 | Female | > 21        | East Asian              | 01/12/2021     | mRNA Vaccine BNT162b4                                  | 17/11/2021                  | Booster                                |
| Healthy adult control 25 | Male   | > 21        | North/Mid/East European | 01/12/2021     | mRNA Vaccine BNT162b4                                  | 03/04/2021                  | First                                  |
| Healthy adult control 26 | Male   | > 21        | Middle Eastern - Arab   | 01/12/2021     | mRNA Vaccine BNT162b4                                  | 11/07/2021                  | Second                                 |
| Healthy adult control 27 | Male   | > 21        | North/Mid/East European | 01/12/2021     | mRNA Vaccine BNT162b4                                  | > 14 days prior to sampling | Second                                 |

**Supplementary Table 2:** Clinical, demographic and laboratory features of children included in the Transcriptomic Cohort. Healthy controls were used for normalisation of the data but not for differential expression analysis or feature selection.

|                                                 | <i>MIS-C (n=38)</i> | <i>KD (n=136)</i> | <i>Viral (n=138)</i> | <i>Bacterial (n=188)</i> | <i>Healthy controls (n=134)</i> |
|-------------------------------------------------|---------------------|-------------------|----------------------|--------------------------|---------------------------------|
| <b>Age in months</b>                            | 126 (65-151)        | 30 (16-52)        | 7 (2-20)             | 38 (11-96)               | 92 (29 – 154)                   |
| <b>Sex at birth (female, %)</b>                 | 13 (39%)            | 59 (43%)          | 45 (33%)             | 85 (45%)                 | 63 (47%)                        |
| <b>Days since symptom onset</b>                 | 6 (5-7)             | 6 (5-8)           | 5 (2-6)              | 2 (1-4)                  | -                               |
| <b>Required inotropic support (n, %)</b>        | 20 (52.6%)          | 2 (1.4%)          | 3 (2%)               | 50 (26.6%)               | -                               |
| <b>Required non-invasive ventilation (n, %)</b> | 5 (13.2%)           | 2 (1.4%)          | 6 (4.3%)             | 46 (24%)                 | -                               |
| <b>Required invasive ventilation (n, %)</b>     | 4 (10.5%)           | 0                 | 7 (5.1%)             | 16 (8.5%)                | -                               |
| <b>Admitted to PICU (n, %)</b>                  | 23 (60.6%)          | 1 (0.7%)          | 25 (18%)             | 84 (44.7%)               | -                               |
| <b>White blood cells (10<sup>9</sup>/L)</b>     | 9.7 (8.1-11.5)      | 13.2 (10.4-18)    | 9.9 (6-14)           | 13.2 (8.1-20.6)          | -                               |
| <b>Neutrophils (10<sup>9</sup>/L)</b>           | 8.1 (4.5-11.0)      | 9.2 (6.3-11.5)    | 3.6 (1.8-6.5)        | 14.1 (6-47)              | -                               |
| <b>Lymphocytes (10<sup>9</sup>/L)</b>           | 1.2 (0.8-1.8)       | 2.8 (1.7-4.9)     | 4.7 (2.8-6.7)        | 2.8 (1.5-8.6)            | -                               |
| <b>Monocytes (10<sup>9</sup>/L)</b>             | 0.3 (0.2-0.4)       | 0.7 (0.5-1.1)     | 0.8 (0.5-1.4)        | 1.6 (0.7-4.8)            | -                               |
| <b>Platelets (10<sup>9</sup>/L)</b>             | 209 (144-300.5)     | 343 (257-426)     | 365 (245-509)        | 243 (157-329)            | -                               |
| <b>CRP (mg/L)</b>                               | 173 (99-250)        | 73 (43-162)       | 13.2 (4.1-38)        | 116.8 (40.3-212)         | -                               |



**Supplementary Table 3:** Clinical characteristics of patients included in the mass cytometry experiment.

| Characteristics                                              | MIS-C          | SBI            | SVI            | KD            | HPC          |
|--------------------------------------------------------------|----------------|----------------|----------------|---------------|--------------|
| n                                                            | 35             | 17             | 10             | 4             | 10           |
| Age (years) (median, IQR)                                    | 8.0 (2.6–13.3) | 6.4 (2.6–13.9) | 2.6 (1.4–10.1) | 0.8 (0.6–2.1) | 6.6 (5.1–10) |
| Female (n, %)                                                | 14 (40%)       | 5 (31%)        | 7 (70%)        | 1 (25%)       | 4 (40%)      |
| Self-reported ethnicity                                      |                |                |                |               |              |
| Asian (n, %)                                                 | 5 (15%)        | 1 (5.9%)       | 1 (10%)        | 1 (25%)       | 0            |
| Black (n, %)                                                 | 8 (24%)        | 1 (5.9%)       | 2 (20%)        | 0             | 2 (20%)      |
| Other (n, %)                                                 | 9 (26%)        | 1 (5.9%)       | 0              | 1 (25%)       | 1 (10%)      |
| White (n, %)                                                 | 12 (35%)       | 14 (82%)       | 7 (70%)        | 2 (50%)       | 7 (70%)      |
| Comorbidity <sup>1</sup>                                     | 4 (11%)        | 7 (41%)        | 1 (10%)        | 1 (25%)       | 0            |
| <i>Presenting clinical features</i>                          |                |                |                |               |              |
| Gastrointestinal symptoms                                    | 27 (77%)       | 12 (71%)       | 3 (30%)        | 3 (75%)       | –            |
| Oral mucositis                                               | 4 (11%)        | 0              | 0              | 2 (50%)       | –            |
| Rash                                                         | 23 (66%)       | 5 (29%)        | 2 (20%)        | 4 (100%)      | –            |
| Respiratory symptoms                                         | 8 (23%)        | 12 (71%)       | 7 (70%)        | 0             | –            |
| <i>Additional findings during admission</i>                  |                |                |                |               |              |
| Maximum CRP concn (mg/l) (median, IQR)                       | 200 (143–270)  | 197 (168–299)  | 129 (67–150)   | 111 (89–147)  | –            |
| Maximum neutrophil count (x10 <sup>9</sup> /l) (median, IQR) | 13 (9.8–18)    | 15 (9.0–20)    | 8.8 (7.2–13)   | 14 (11–16)    | –            |
| Minimum lymphocyte count (x10 <sup>9</sup> /l) (median, IQR) | 0.6 (0.4–1.2)  | 1.3 (0.6–2.9)  | 1.0 (0.7–2.0)  | 2.4 (1.7–3.2) | –            |
| Coronary artery aneurysm (n, %)                              | 5 (14%)        | 0              | 0              | 1 (25%)       | –            |
| <i>Treatments during admission</i>                           |                |                |                |               |              |
| Mechanical ventilation (n, %)                                | 3 (8.8%)       | 8 (47%)        | 8 (80%)        | 0             | –            |
| Vasoactive infusion (n, %)                                   | 32 (94%)       | 9 (56%)        | 3 (3.3%)       | 0             | –            |
| Intravenous immunoglobulin                                   | 12 (34%)       | 2 (12%)        | 0              | 4 (100%)      | –            |
| High dose corticosteroids                                    | 33 (94%)       | 1 (5.8%)       | 0              | 3 (75%)       | –            |
| Monoclonal antibody therapy <sup>2</sup>                     | 8 (23%)        | 0              | 0              | 0             | –            |
| <i>Outcome</i>                                               |                |                |                |               |              |
| PICU admission (n, %)                                        | 34 (97%)       | 16 (94%)       | 9 (90%)        | 0             | –            |
| Hospital length of stay (days) (median, IQR)                 | 6.7 (5.5–8.2)  | 8.7 (7.8–17)   | 14 (7.4–28)    | 6.7 (4.9–8.6) | –            |
| In-hospital mortality (n, %)                                 | 1 (2.9%)       | 1 (5.9%)       | 1 (10%)        | 0             | –            |
| <i>Infections identified</i>                                 |                |                |                |               |              |
| SARS-CoV-2 PCR/antigen positive (n, %)                       | 1 (2.9%)       | 0              | 3 (30%)        | 0             | –            |
| SARS-CoV-2 IgG antibody positive (n, %)                      | 33 (94%)       | 0              | 3 (30%)        | 0             | –            |

<sup>1</sup>MIS-C: Minor neurological co-morbidities 2, respiratory 1, endocrinological 1; SBI: respiratory 2, cardiac 1, endocrinological 1, minor neurological 2, other genetic syndrome 1; SVI: other genetic syndrome 1; KD: renal 1 child. <sup>2</sup>MIS-C: tocilizumab in 8 children.

**Supplementary Table 4.** Clinical characteristics of children within Cluster 1 and Cluster 2 as defined by immunophenotyping using mass cytometry data. Statistical comparisons between Cluster 1 and Cluster 2 were made using the two-sided Fisher exact test of proportions or two-sided Wilcoxon test with no adjustments for multiple comparisons.

|                                                            | Cluster 1     | Cluster 2     | p      |
|------------------------------------------------------------|---------------|---------------|--------|
| n                                                          | 29 (44%)      | 37 (56%)      |        |
| <i>Disease group</i>                                       |               |               |        |
| MIS-C                                                      | 22 (76%)      | 13 (35%)      | 0.001  |
| SBI                                                        | 4 (14%)       | 13 (35%)      | 0.087  |
| SVI                                                        | 3 (10%)       | 7 (19%)       | 0.493  |
| KD                                                         | 0             | 4 (11%)       | 0.125  |
| Age (years) (median, IQR)                                  | 9.3 (4.9–14)  | 5.4 (1.6–8.9) | <0.001 |
| Female (n, %)                                              | 12 (41%)      | 15 (41%)      | 1      |
| <i>Self-reported ethnicity</i>                             |               |               |        |
| Asian (n, %)                                               | 1 (3%)        | 2 (5%)        | 1      |
| Black (n, %)                                               | 5 (17%)       | 5 (14%)       | 0.738  |
| Other (n, %)                                               | 10 (34%)      | 9 (24%)       | 0.419  |
| White (n, %)                                               | 13 (45%)      | 21 (57%)      | 0.457  |
| <i>Additional findings during admission</i>                |               |               |        |
| Maximum CRP concentration (mg/l) (median, IQR)             | 209 (134–288) | 179 (124–220) | 0.392  |
| <i>Treatments during admission</i>                         |               |               |        |
| Mechanical ventilation (n, %)                              | 7 (24%)       | 9 (24%)       | 1      |
| Vasoactive infusion (n, %)                                 | 19 (66%)      | 15 (41%)      | 0.051  |
| Intravenous immunoglobulin (pre-T1 sampling)               | 5 (17%)       | 5 (14%)       | 0.738  |
| High dose corticosteroids (pre-T1 sampling)                | 12 (41%)      | 8 (22%)       | 0.108  |
| Monoclonal antibody therapy <sup>2</sup> (pre-T1 sampling) | 0             | 1 (3%)        | 1      |
| <i>Outcome</i>                                             |               |               |        |
| PICU admission (n, %)                                      | 23 (79%)      | 25 (68%)      | 0.405  |
| Hospital length of stay (days) (median, IQR)               | 6.8 (6.2–7.9) | 8.1 (5.5–10)  | 0.413  |

**Supplementary Table 5.** Summary of supernatant cytokine analysis following cell stimulation experiments. Median values by cohort and timepoint for baseline results and percentage change from baseline following stimulation with SARS-CoV-2 antigen and mitogen (phytohemagglutinin) are shown. Patients with Multisystem Inflammatory Syndrome in Children (MIS-C), Severe bacterial illness (SBI), Kawasaki disease (KD), Severe viral illness (SVI) and other inflammatory conditions at acute (TP1) and convalescence (TP3), as well as healthy paediatric controls and healthy COVID-19 vaccinated adults were included. The number of samples are indicated in the table for each result. Units are pg/ml for all cytokines are derived from a standard curve for each assay. Abbreviations: IL, interleukin; TNF, tumour necrosis factor; IP, interferon induced protein, GMCSF, granulocyte-macrophage colony stimulating factor; IFN, interferon.

|  |                 |
|--|-----------------|
|  | Highest value   |
|  | 50th Percentile |
|  | Lowest value    |

| Disease group and timepoint | BASELINE - median results for each cohort/timepoint                                          |             |           |           |          |          |           |           |                    |       |        |
|-----------------------------|----------------------------------------------------------------------------------------------|-------------|-----------|-----------|----------|----------|-----------|-----------|--------------------|-------|--------|
|                             | MIS-C - TP1                                                                                  | MIS-C - TP3 | SBI - TP1 | SBI - TP3 | KD - TP1 | KD - TP3 | SVI - TP1 | SVI - TP3 | Inflammatory - TP1 | HPC   | HAC    |
| IL1b                        | 42                                                                                           | 70          | 86        | 134       | NA       | 158      | 65        | 8         | 69                 | 54    | 64     |
| IL6                         | 103                                                                                          | 55          | 164       | 179       | NA       | 187      | 83        | 149       | 389                | 86    | 319    |
| TNFα                        | 24                                                                                           | 54          | 35        | 208       | NA       | 118      | 41        | 1         | 44                 | 33    | 44     |
| IP10                        | 948                                                                                          | 101         | 256       | 78        | 27       | 143      | 757       | 1071      | 190                | 79    | 167    |
| IFNλ1                       | 82                                                                                           | 170         | 123       | 97        | 1000000  | 240      | 229       | 10        | 264                | 119   | 80     |
| IL8                         | 541                                                                                          | 2384        | 3314      | 3365      | 7386     | 3359     | 1494      | 210       | 5469               | 1769  | 4512   |
| IL12p70                     | 2                                                                                            | 8           | 4         | 4         | 4        | 4        | 2         | 0         | 3                  | 3     | 2      |
| IFNα2                       | 9                                                                                            | 16          | 14        | 14        | 23       | 34       | 11        | 4         | 14                 | 11    | 3      |
| IFNλ2/3                     | 232                                                                                          | 175         | 292       | 130       | 215      | 385      | 252       | 60        | 226                | 213   | 210    |
| GMCSF                       | 6                                                                                            | 35          | 20        | 24        | 18       | 9        | 12        | 0         | 10                 | 8     | 0      |
| IFNβ                        | 14                                                                                           | 0           | 27        | 10        | 0        | 43       | 7         | 3         | 14                 | 0     | 0      |
| IL20                        | 32                                                                                           | 11          | 23        | 7         | 28       | 6        | 31        | 157       | 14                 | 11    | 5      |
| IFNγ                        | 169                                                                                          | 307         | 156       | 89        | 88       | 413      | 215       | 114       | 110                | 122   | 29     |
| Number of samples           | 41                                                                                           | 15          | 13        | 3         | 1        | 3        | 7         | 1         | 9                  | 15    | 25     |
| Disease group and timepoint | SARS-CoV-2 AG STIMULATION - median percentage change from baseline for each cohort/timepoint |             |           |           |          |          |           |           |                    |       |        |
|                             | MIS-C - TP1                                                                                  | MIS-C - TP3 | SBI - TP1 | SBI - TP3 | KD - TP1 | KD - TP3 | SVI - TP1 | SVI - TP3 | Inflammatory - TP1 | HPC   | HAC    |
| IL1b                        | 8%                                                                                           | 22%         | 8%        | -22%      | NA       | -9%      | -22%      | 15%       | -2%                | 2%    | 28%    |
| IL6                         | -4%                                                                                          | 35%         | 3%        | -43%      | NA       | 79%      | 5%        | -25%      | 0%                 | -2%   | 45%    |
| TNFα                        | -16%                                                                                         | 19%         | 25%       | -18%      | NA       | 125%     | 49%       | -42%      | -12%               | -26%  | 66%    |
| IP10                        | 0%                                                                                           | 60%         | 1%        | 5%        | 107%     | 19%      | -7%       | 9%        | 3%                 | 26%   | 427%   |
| IFNλ1                       | 1%                                                                                           | -6%         | 5%        | 633305%   | -100%    | 29%      | -51%      | -100%     | -22%               | 6%    | 7%     |
| IL8                         | 51%                                                                                          | 36%         | 40%       | 68%       | 97%      | 37%      | 67%       | 89%       | 21%                | 67%   | 78%    |
| IL12p70                     | 6%                                                                                           | 3%          | 14%       | 6%        | 14%      | -1%      | -10%      | -24%      | -14%               | -2%   | 9%     |
| IFNα2                       | 7%                                                                                           | 4%          | 6%        | -7%       | 14%      | 12%      | -1%       | -50%      | -24%               | 9%    | 15%    |
| IFNλ2/3                     | -2%                                                                                          | 15%         | 6%        | -25%      | 24%      | 26%      | -40%      | -33%      | -32%               | 18%   | 10%    |
| GMCSF                       | -10%                                                                                         | 6%          | 14%       | -31%      | 22%      | 44%      | -7%       | -100%     | -32%               | 2%    | 32%    |
| IFNβ                        | -10%                                                                                         | 12%         | -12%      | 28%       | 3771%    | 89%      | -87%      | -100%     | -61%               | -41%  | 141%   |
| IL20                        | -2%                                                                                          | 27%         | 7%        | -23%      | 3%       | 24%      | 12%       | -22%      | -7%                | -11%  | 56%    |
| IFNγ                        | 8%                                                                                           | 47%         | 26%       | 4%        | 20%      | 36%      | 2%        | -68%      | -13%               | 25%   | 246%   |
| Number of samples           | 35                                                                                           | 15          | 13        | 3         | 1        | 3        | 6         | 1         | 9                  | 14    | 22     |
| Disease group and timepoint | MITOGEN STIMULATION - median percentage change from baseline for each cohort/timepoint       |             |           |           |          |          |           |           |                    |       |        |
|                             | MIS-C - TP1                                                                                  | MIS-C - TP3 | SBI - TP1 | SBI - TP3 | KD - TP1 | KD - TP3 | SVI - TP1 | SVI - TP3 | Inflammatory - TP1 | HPC   | HAC    |
| IL1b                        | 85%                                                                                          | 346%        | 17%       | 649%      | NA       | 573%     | 210%      | 96%       | 15%                | 402%  | 692%   |
| IL6                         | 114%                                                                                         | 6492%       | 64%       | 1772%     | NA       | 7063%    | 911%      | 554%      | -1%                | 8673% | 3102%  |
| TNFα                        | 107%                                                                                         | 268%        | 87%       | 959%      | NA       | 920%     | 349%      | 85%       | 46%                | 3266% | 2924%  |
| IP10                        | 18%                                                                                          | 1331%       | 38%       | 2116%     | 568%     | 2172%    | 99%       | 1510%     | 20%                | 2178% | 1125%  |
| IFNλ1                       | 7%                                                                                           | 18%         | 7%        | 52%       | -100%    | 220%     | 14%       | 15%       | 70%                | 83%   | 24%    |
| IL8                         | 495%                                                                                         | 419%        | 142%      | 450%      | 249%     | 144%     | 620%      | 230%      | 17%                | 757%  | 355%   |
| IL12p70                     | 15%                                                                                          | 27%         | 8%        | 32%       | 65%      | 145%     | 32%       | 54%       | -35%               | 51%   | 211%   |
| IFNα2                       | 3%                                                                                           | 36%         | 10%       | -19%      | 54%      | 31%      | 20%       | 61%       | -15%               | 43%   | 47%    |
| IFNλ2/3                     | -7%                                                                                          | 29%         | 1%        | -10%      | 57%      | 44%      | 11%       | 9%        | 22%                | 20%   | 36%    |
| GMCSF                       | 32%                                                                                          | 183%        | 24%       | 1561%     | 98%      | 566%     | 98%       | 122%      | 33%                | 1591% | 16706% |
| IFNβ                        | 13%                                                                                          | 59%         | 7%        | 130%      | 9047%    | 1626%    | 360%      | 187%      | -31%               | 101%  | 289%   |
| IL20                        | 24%                                                                                          | 1342%       | 41%       | 5137%     | 24%      | 3122%    | 242%      | 104%      | 2%                 | 2464% | 10328% |
| IFNγ                        | 139%                                                                                         | 2025%       | 265%      | 23720%    | 306%     | 5776%    | 803%      | 1168%     | 36%                | 6683% | 91444% |
| Number of samples           | 35                                                                                           | 15          | 13        | 3         | 1        | 3        | 6         | 1         | 9                  | 14    | 22     |

**Supplementary Table 6.** Clinical characteristics of patients and controls included in the cell stimulation mass cytometry experiment. Abbreviations: HPC, healthy pediatric controls.

|                                                              | <b>MIS-C<br/>(N = 12)</b> | <b>HPCs<br/>(N = 3)</b> |
|--------------------------------------------------------------|---------------------------|-------------------------|
| Age (years), median [IQR]                                    | 6.0 [4.0 - 11]            | 9.5 [6.0-12]            |
| Male sex, n (%)                                              | 8 (66.7%)                 | 2(66.7%)                |
| Ethnicity                                                    |                           |                         |
| Black                                                        | 6 (50.0%)                 | 0 (0%)                  |
| Asian                                                        | 2 (16.7%)                 | 0 (0%)                  |
| White                                                        | 3 (25.0%)                 | 3 (100%)                |
| Other/Not known                                              | 1 (8.3%)                  | 0 (0%)                  |
| Maximum CRP (mg/L), median [IQR]                             | 220 [160 - 300]           | -                       |
| Maximum Neutrophil count (x10 <sup>9</sup> /L), median [IQR] | 14 [11 - 18]              | -                       |
| Maximum Lymphocyte count (x10 <sup>9</sup> /L), median [IQR] | 7.5 [5.0 - 12]            | -                       |
| IVIg pre-mass cytometry sample, n(%)                         | 5 (41.7%)                 | -                       |
| Steroids pre-mass cytometry sample, n(%)                     | 10 (83.3%)                | -                       |
| Monoclonal antibodies pre-mass cytometry sample, n(%)        | 3 (25.0%)                 | -                       |
| ITU, n (%)                                                   | 10 (83.3%)                | -                       |
| Shock, n (%)                                                 | 9 (75.0%)                 | -                       |
| Inotropes, n (%)                                             | 9 (75.0%)                 | -                       |
| Invasive ventilation, n (%)                                  | 1 (8.3%)                  | -                       |
| Death, n (%)                                                 | 0 (0%)                    | -                       |
| Length of hospital admission (days), median [IQR]            | 6.5 [5.0 - 8.0]           | -                       |
| SARS-CoV-2 PCR positive, n (%)                               | 0 (0%)                    | -                       |
| SARS-CoV-2 Serology positive, n (%)                          | 10 (83%)                  | -                       |

## Supplementary Table 7. Strobe Checklist

STROBE Statement—checklist of items that should be included in reports of observational studies

|                          | Item No. | Recommendation                                                                                                                                                                             | Page No.                      | Relevant text from manuscript |
|--------------------------|----------|--------------------------------------------------------------------------------------------------------------------------------------------------------------------------------------------|-------------------------------|-------------------------------|
| Title and abstract       | 1        | (a) Indicate the study's design with a commonly used term in the title or the abstract                                                                                                     | 1                             |                               |
|                          |          | (b) Provide in the abstract an informative and balanced summary of what was done and what was found                                                                                        | 4                             |                               |
| <b>Introduction</b>      |          |                                                                                                                                                                                            |                               |                               |
| Background/rationale     | 2        | Explain the scientific background and rationale for the investigation being reported                                                                                                       | 5–6                           |                               |
| Objectives               | 3        | State specific objectives, including any prespecified hypotheses                                                                                                                           | 5–6                           |                               |
| <b>Methods</b>           |          |                                                                                                                                                                                            |                               |                               |
| Study design             | 4        | Present key elements of study design early in the paper                                                                                                                                    | 5–6                           |                               |
| Setting                  | 5        | Describe the setting, locations, and relevant dates, including periods of recruitment, exposure, follow-up, and data collection                                                            | 17–18                         |                               |
| Participants             | 6        | (a) <i>Cohort study</i> —Give the eligibility criteria, and the sources and methods of selection of participants. Describe methods of follow-up                                            | 17–18                         |                               |
|                          |          | <i>Case-control study</i> —Give the eligibility criteria, and the sources and methods of case ascertainment and control selection. Give the rationale for the choice of cases and controls |                               |                               |
|                          |          | <i>Cross-sectional study</i> —Give the eligibility criteria, and the sources and methods of selection of participants                                                                      |                               |                               |
|                          |          | (b) <i>Cohort study</i> —For matched studies, give matching criteria and number of exposed and unexposed                                                                                   | 17–18 and Suppl. Figure 1     |                               |
|                          |          | <i>Case-control study</i> —For matched studies, give matching criteria and the number of controls per case                                                                                 |                               |                               |
|                          |          |                                                                                                                                                                                            |                               |                               |
| Variables                | 7        | Clearly define all outcomes, exposures, predictors, potential confounders, and effect modifiers. Give diagnostic criteria, if applicable                                                   | Table 1 and Figures           |                               |
| Data sources/measurement | 8*       | For each variable of interest, give sources of data and details of methods of assessment (measurement). Describe comparability of assessment methods if there is more than one group       | 18–26 and Suppl. Figures 2–4. |                               |

|                        |     |                                                                                                                                                                                                                                                                                                           |                                       |
|------------------------|-----|-----------------------------------------------------------------------------------------------------------------------------------------------------------------------------------------------------------------------------------------------------------------------------------------------------------|---------------------------------------|
| Bias                   | 9   | Describe any efforts to address potential sources of bias                                                                                                                                                                                                                                                 | 5–6, 18–26                            |
| Study size             | 10  | Explain how the study size was arrived at                                                                                                                                                                                                                                                                 | 5–6                                   |
| Quantitative variables | 11  | Explain how quantitative variables were handled in the analyses. If applicable, describe which groupings were chosen and why                                                                                                                                                                              | 18–26                                 |
| Statistical methods    | 12  | (a) Describe all statistical methods, including those used to control for confounding                                                                                                                                                                                                                     | 18–26                                 |
|                        |     | (b) Describe any methods used to examine subgroups and interactions                                                                                                                                                                                                                                       | 18–26                                 |
|                        |     | (c) Explain how missing data were addressed                                                                                                                                                                                                                                                               | 18–26                                 |
|                        |     | (d) <i>Cohort study</i> —If applicable, explain how loss to follow-up was addressed<br><i>Case-control study</i> —If applicable, explain how matching of cases and controls was addressed<br><i>Cross-sectional study</i> —If applicable, describe analytical methods taking account of sampling strategy | Suppl.<br>Figure 1                    |
|                        |     | (e) Describe any sensitivity analyses                                                                                                                                                                                                                                                                     | N/A                                   |
| <b>Results</b>         |     |                                                                                                                                                                                                                                                                                                           |                                       |
| Participants           | 13* | (a) Report numbers of individuals at each stage of study—eg numbers potentially eligible, examined for eligibility, confirmed eligible, included in the study, completing follow-up, and analysed                                                                                                         | Suppl.<br>Figures 1 and 2,<br>Table 1 |
|                        |     | (b) Give reasons for non-participation at each stage                                                                                                                                                                                                                                                      | N/A                                   |
|                        |     | (c) Consider use of a flow diagram                                                                                                                                                                                                                                                                        | Suppl.<br>Figure 1                    |
| Descriptive data       | 14* | (a) Give characteristics of study participants (eg demographic, clinical, social) and information on exposures and potential confounders                                                                                                                                                                  | Table 1                               |
|                        |     | (b) Indicate number of participants with missing data for each variable of interest                                                                                                                                                                                                                       | Table 1                               |
|                        |     | (c) <i>Cohort study</i> —Summarise follow-up time (eg, average and total amount)                                                                                                                                                                                                                          | Suppl.<br>Figure 1                    |
| Outcome data           | 15* | <i>Cohort study</i> —Report numbers of outcome events or summary measures over time                                                                                                                                                                                                                       | Table 1                               |

|                          |    |                                                                                                                                                                                                              |             |
|--------------------------|----|--------------------------------------------------------------------------------------------------------------------------------------------------------------------------------------------------------------|-------------|
|                          |    | <i>Case-control study</i> —Report numbers in each exposure category, or summary measures of exposure                                                                                                         |             |
|                          |    | <i>Cross-sectional study</i> —Report numbers of outcome events or summary measures                                                                                                                           |             |
| Main results             | 16 | (a) Give unadjusted estimates and, if applicable, confounder-adjusted estimates and their precision (eg, 95% confidence interval). Make clear which confounders were adjusted for and why they were included | Figures 1–5 |
|                          |    | (b) Report category boundaries when continuous variables were categorized                                                                                                                                    | Figures 1–5 |
|                          |    | (c) If relevant, consider translating estimates of relative risk into absolute risk for a meaningful time period                                                                                             |             |
| Other analyses           | 17 | Report other analyses done—eg analyses of subgroups and interactions, and sensitivity analyses                                                                                                               | Figures 1–5 |
| <b>Discussion</b>        |    |                                                                                                                                                                                                              |             |
| Key results              | 18 | Summarise key results with reference to study objectives                                                                                                                                                     | 14–16       |
| Limitations              | 19 | Discuss limitations of the study, taking into account sources of potential bias or imprecision. Discuss both direction and magnitude of any potential bias                                                   | 14–16       |
| Interpretation           | 20 | Give a cautious overall interpretation of results considering objectives, limitations, multiplicity of analyses, results from similar studies, and other relevant evidence                                   | 14–16       |
| Generalisability         | 21 | Discuss the generalisability (external validity) of the study results                                                                                                                                        | 14–16       |
| <b>Other information</b> |    |                                                                                                                                                                                                              |             |
| Funding                  | 22 | Give the source of funding and the role of the funders for the present study and, if applicable, for the original study on which the present article is based                                                | 37          |

**Supplementary Figure 1.** Duration of prior fever, admission to wards and paediatric intensive care units (PICU) and convalescence relative to sampling at T1, T2 and T3 for individual patients grouped by their severe febrile illness (all patients recruited to the study).

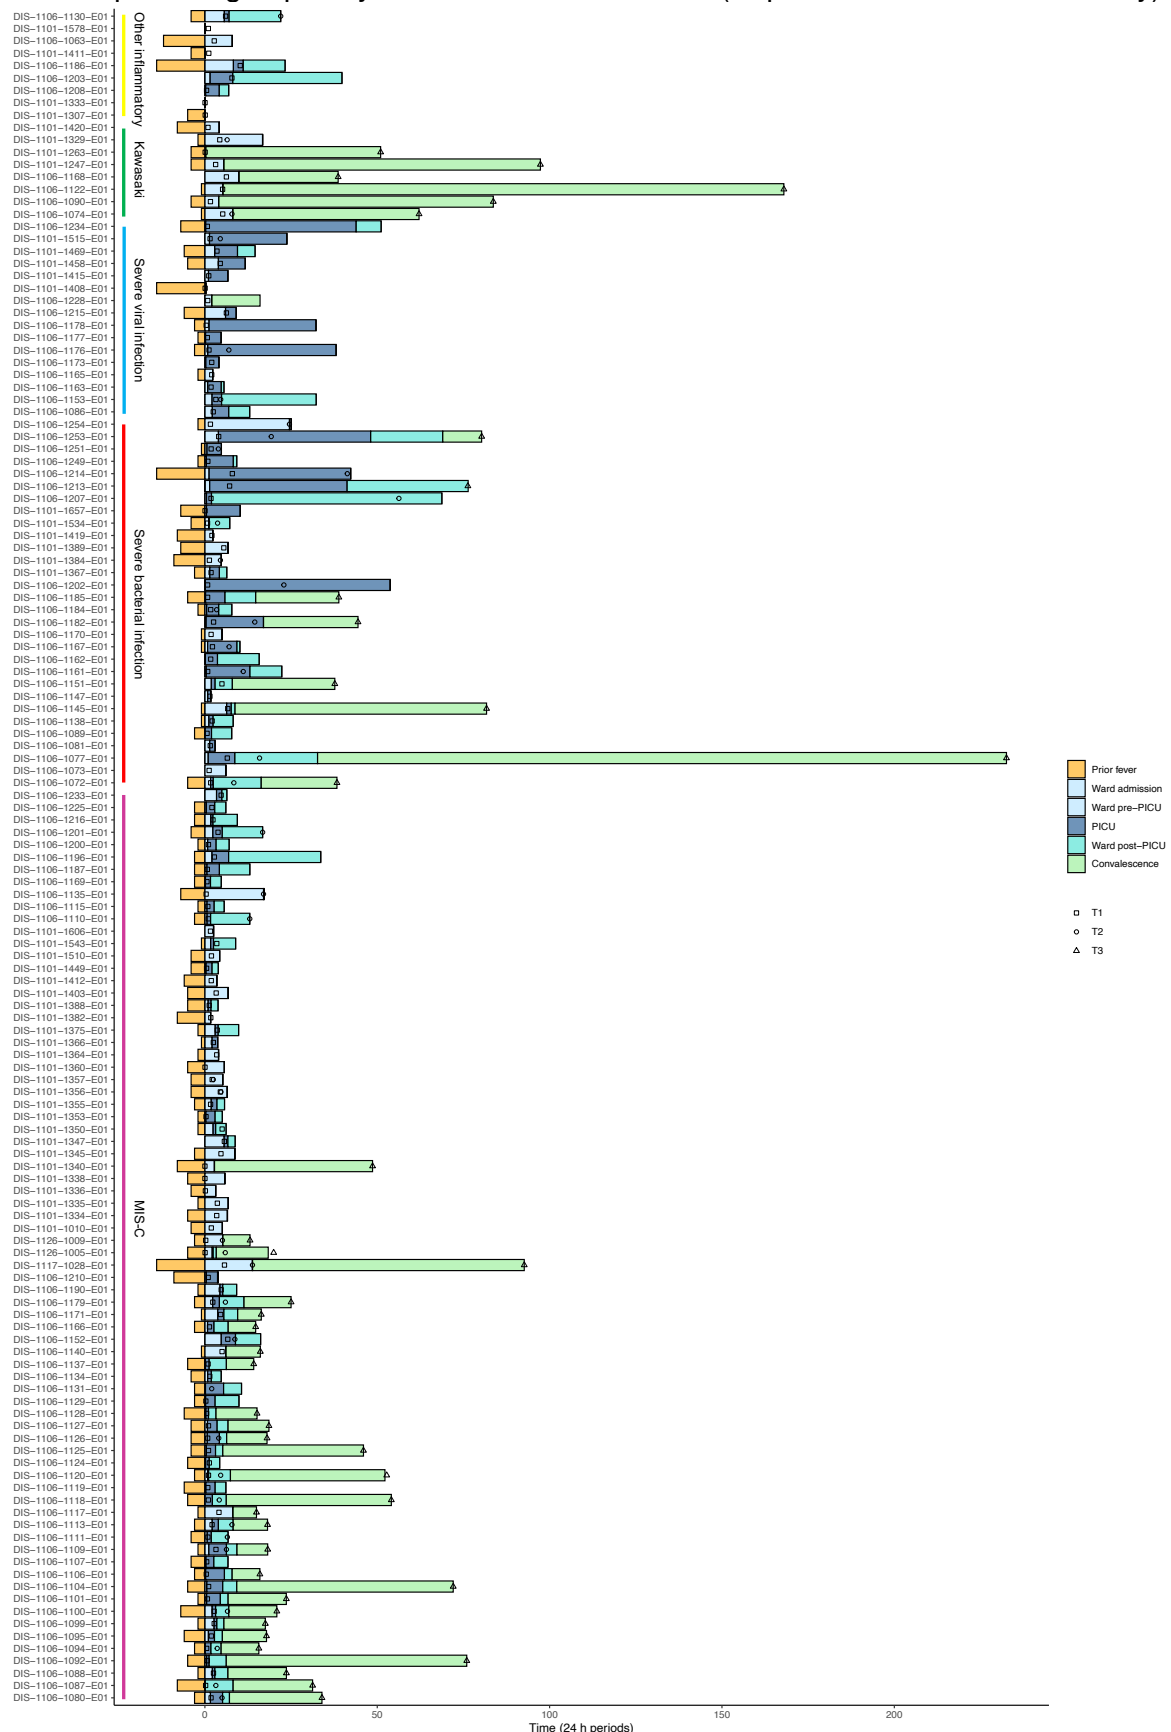



**Supplementary Figure 2.** Upset plot visualizing counts of patients/controls across different assays. The number of patients and controls analyzed by various combination of assays is shown by vertical bars on the top of the diagrams. The total number of patients analyzed with each assay is indicated by horizontal bars on the right of each panel. Acute (T1), defervescence (T2) and convalescence (T3) are shown. Abbreviations: KD, Kawasaki disease.

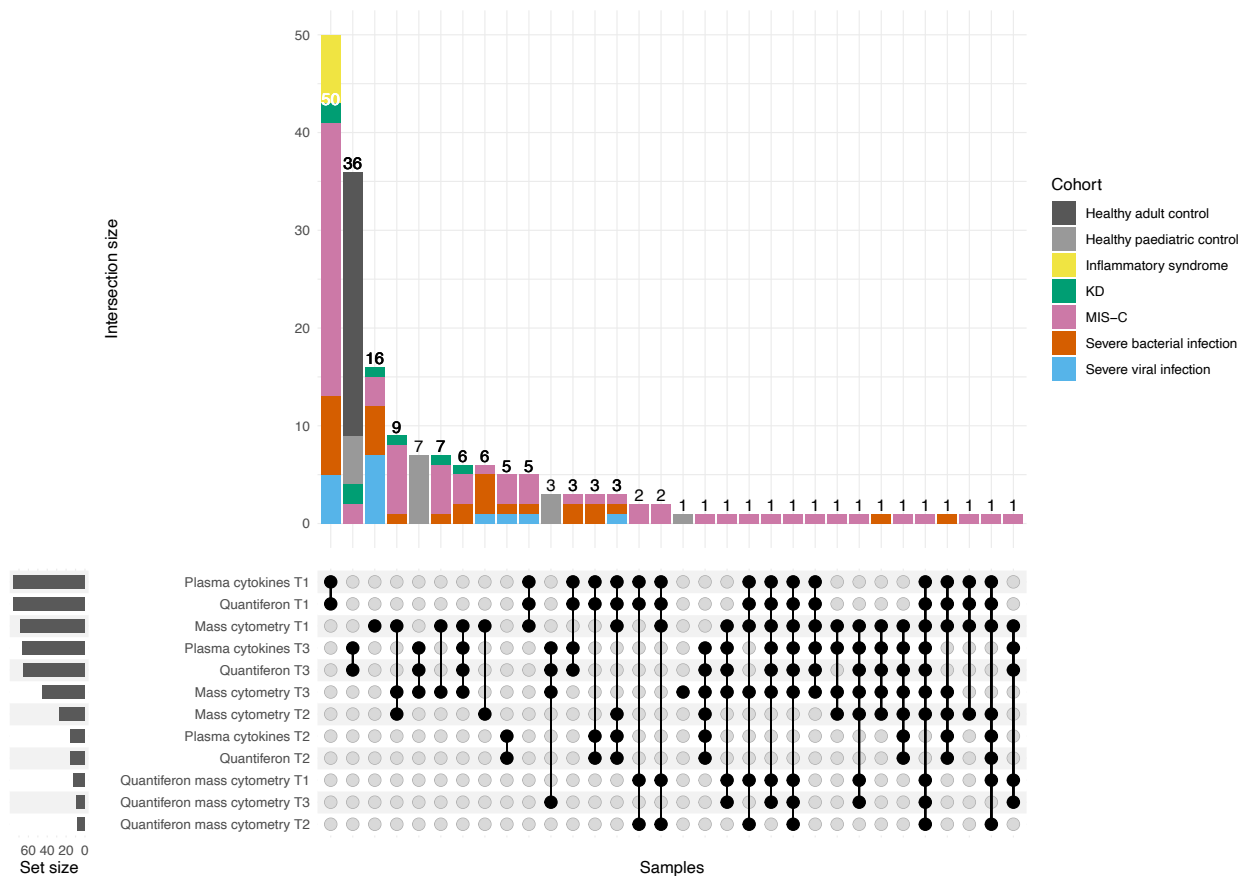

**Supplementary Figure 3.** Mass cytometry methods. **a–d**, Antibodies used for the mass cytometry methods. Antibodies were from Fluidigm (CA, USA) unless specified. Biolegend (CA, USA) antibodies were custom conjugated to metal tags at the at Guy's and St Thomas' NHS Foundation Trust. Antibodies used for analysis of cell proportions are denoted with an asterisk (also see gating strategy that details this analysis). Note CD8a and CD64 were chelated to the same metal tag but manually gated separately using CD3 as a marker for T cells. **e**, Manual gating strategy, and **f**, implementation of this strategy on a single representative patient (drawn from FlowJo, Beckmann-Coulter based directly on gating in Cytobank, Beckmann-Coulter). **g**, Expression of markers on cell populations from patients with acute MIS-C (other time points and severe febrile illnesses were examined in the same manner).

### a, Barcoding mastermixes

|          |                          |
|----------|--------------------------|
| Sample 1 | CD45-106Cd<br>CD45-110Cd |
| Sample 2 | CD45-106Cd<br>CD45-198Pt |
| Sample 3 | CD45-106Cd<br>CD45-89Y   |
| Sample 4 | CD45-110Cd<br>CD45-198Pt |
| Sample 5 | CD45-110Cd<br>CD45-89Y   |
| Sample 6 | CD45-198Pt<br>CD45-89Y   |

### b, Cell surface mastermix

| Cell surface stain           | Metal Tag |
|------------------------------|-----------|
| CD3 UCHT1 (Biolegend)*       | 111Cd     |
| CD4 RPA-T4 (Biolegend)*      | 113Cd     |
| CD25 (2A3)*                  | 169Tm     |
| CD127/IL-7Ra (A019D5)*       | 176Yb     |
| CD45RO (UCHL1)*              | 149Sm     |
| HLA-DR (G46- 6)*             | 151Eu     |
| CD197/CCR7 (G043H7)*         | 167Er     |
| CD45RA (Hi100)*              | 156Gd     |
| CD38 HB-7 HIT2 (Biolegend)*  | 161Dy     |
| CD8a RPA-T8 (Biolegend)*     | 116Cd     |
| TCRgd (11F2)*                | 152Sm     |
| CD19 HIB19 (Biolegend)*      | 112Cd     |
| CD14 RMO52 M5E2 (Biolegend)* | 114Cd     |
| CD15 W6D3 (Biolegend)*       | 142Nd     |
| CD16 (3G8)*                  | 209Bi     |
| CD20 (2H7)*                  | 171Yb     |
| CD11c (Bu15)*                | 159Tb     |
| CD27 (L128)*                 | 162Dy     |
| CD5 UCHT2 (Biolegend)        | 141Pr     |
| CD64 10.1 (Biolegend)        | 116Cd     |
| CD278/COS (C398.4A)          | 143Nd     |
| CD11b/Mac-1 (ICRF44)         | 144Nd     |
| CD223/LAG-3 (11C3C65)        | 150Nd     |
| CD10 HI10a                   | 156Gd     |
| CD134/OX40 (ACT35)           | 158Gd     |
| CD95/Fas DX2 (Biolegend)     | 163Dy     |
| CD161 (HP- 3G10)             | 164Dy     |
| CD206/MMR (15-2)             | 168Er     |
| CD279/PD-1 (EH12.2H7)        | 174Yb     |
| CD28 (CD28.2)                | 160Gd     |

### c, Intracellular cytokine mastermix

| Intracellular cytokines    | Metal Tag |
|----------------------------|-----------|
| IL-6 (MQ2- 13A5)           | 154Sm     |
| IL-17A (BL168)             | 148Nd     |
| IFN $\gamma$ (B27)         | 165Ho     |
| TNF $\alpha$ (MAb11)       | 146Nd     |
| IL-2 MQ1-17H12 (Biolegend) | 145Nd     |
| CD152/CTLA-4 (14D3)        | 170Er     |

### d, Phosphorylated marker mastermix

| Phosphorylated targets    | Metal Tag |
|---------------------------|-----------|
| pStat5 [Y694] (47)        | 147Sm     |
| pStat1 [Y701] (4a)        | 153Eu     |
| pS6 [S235/S236] (N7- 548) | 175Lu     |
| pNFKBp65 [S529] (K10x)    | 166Er     |

### e, Manual gating of cell populations

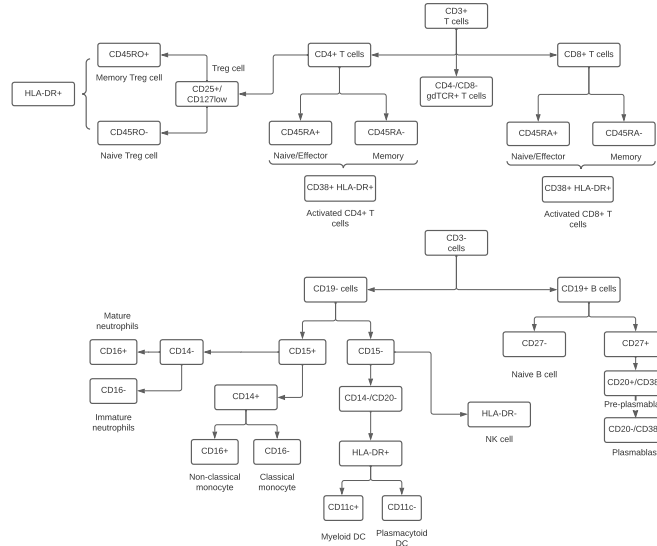

### f, Implementation of manual gating on a single patient with acute MIS-C

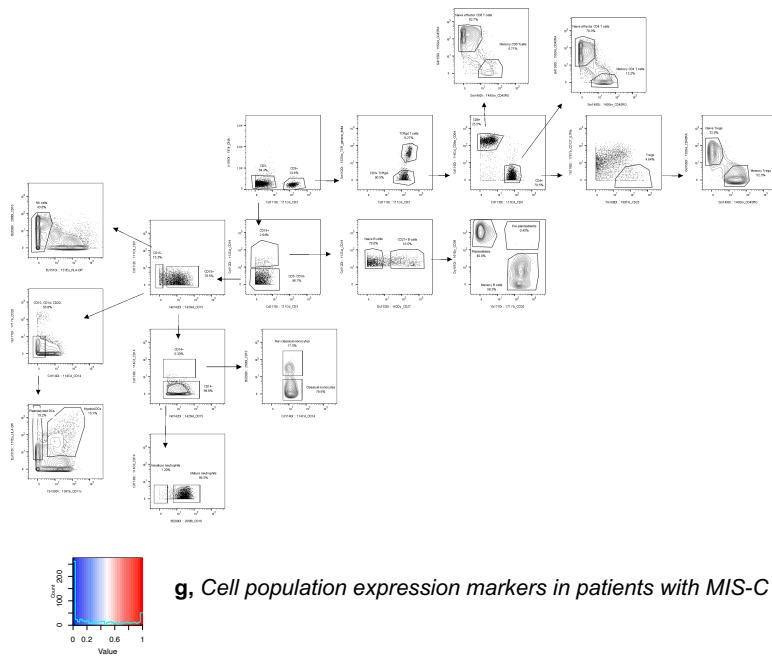

### g, Cell population expression markers in patients with MIS-C

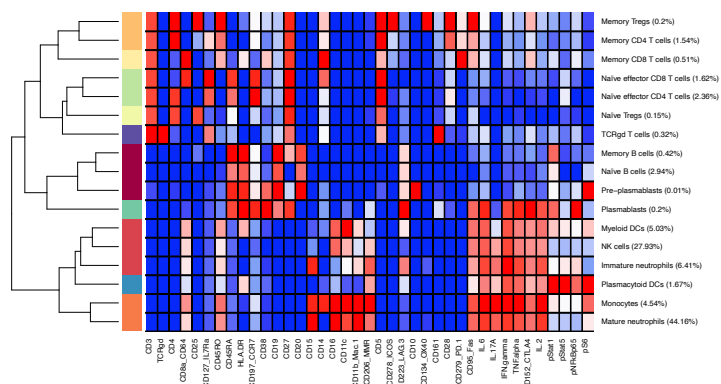



**Supplementary Figure 4. Immune cell populations and expression of markers by mass cytometry.** a, Heatmaps displaying hierarchical clustering of immune cell populations from manually gated mass cytometry data in children with acute (time point 1, T1) multisystem inflammatory syndrome in children (MIS-C, n=35), severe bacterial infection (SBI, n=17), severe viral infection (SVI, n=10), Kawasaki disease (KD, n=4) and healthy paediatric controls (HPC, n=10), used in the main manuscript. Cells are coloured by the expression of cell markers in an immune cell population, normalised to the expression of that marker across all immune cells analysed. Each heatmap describes a different severe febrile illness at timepoint 1.

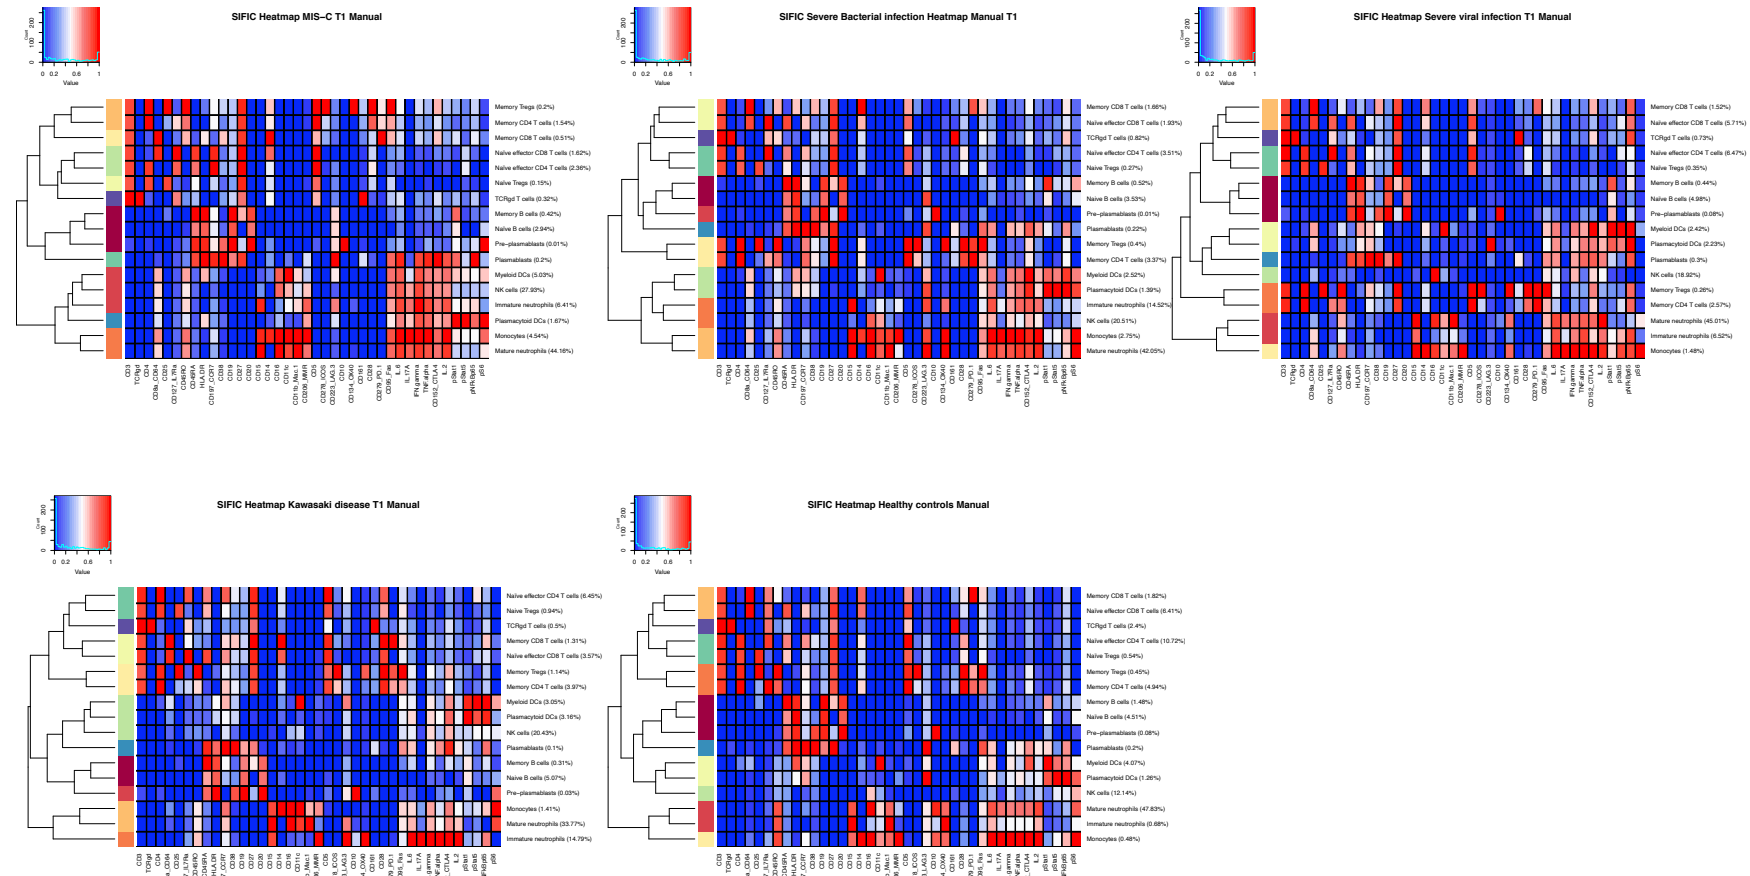

**b**, Heatmaps displaying hierarchical clustering of immune cell populations from manually gated mass cytometry data in children with MIS-C at time point 1 (T1, acute febrile within 48 hours of admission, n=35), time point 2 (T2, defervescence with CRP concentration <100 mg/l, n=16) and timepoint 3 (T3, convalescence at follow-up clinic, n=26) and healthy paediatric controls (n=10). Cells are coloured by expression as for **a** (above).

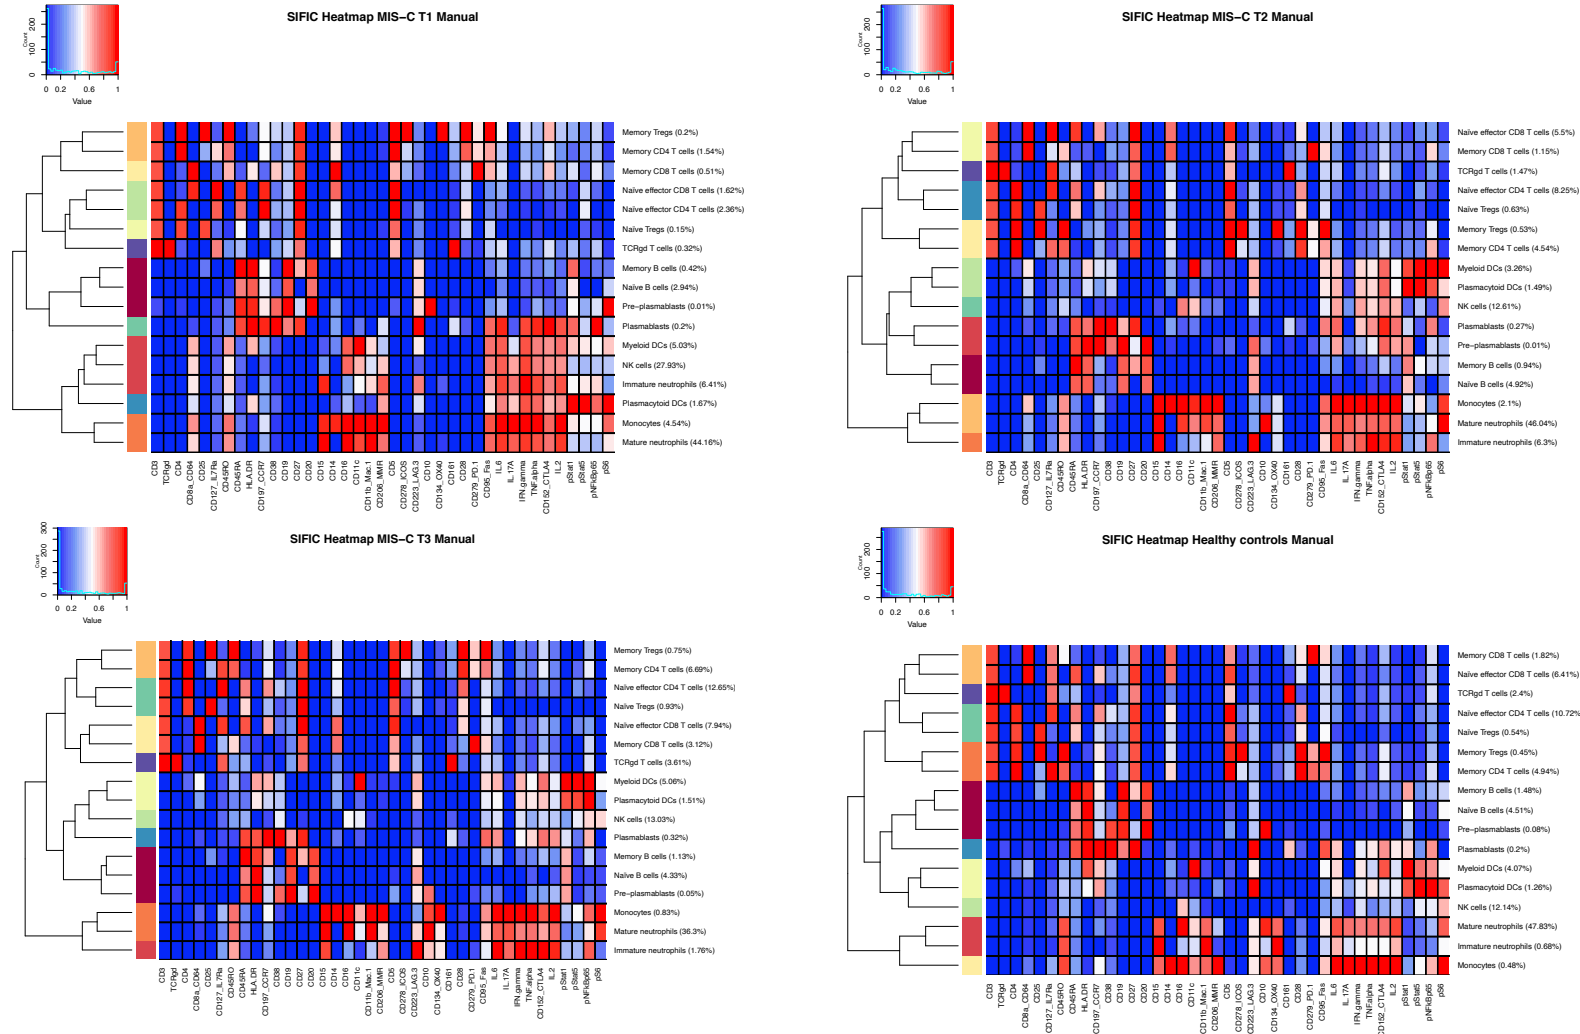

**c**, Heatmaps displaying hierarchical clustering of immune cell populations from manually gated mass cytometry data in children with severe bacterial infection (SBI) at time point 1 (T1, acute febrile within 48 hours of admission, n=17), time point 2 (T2, defervescence with CRP concentration <100 mg/l, n=8) and timepoint 3 (T3, convalescence at follow-up clinic, n=6) and healthy paediatric controls (n=10). Cells are coloured by expression as for **a** and **b** (above).

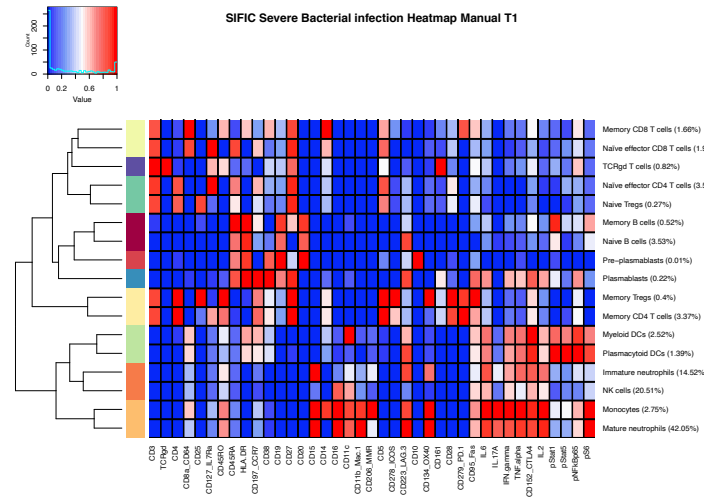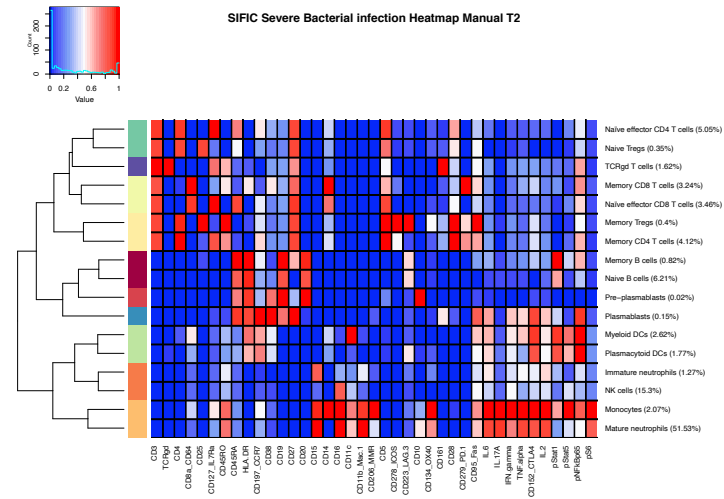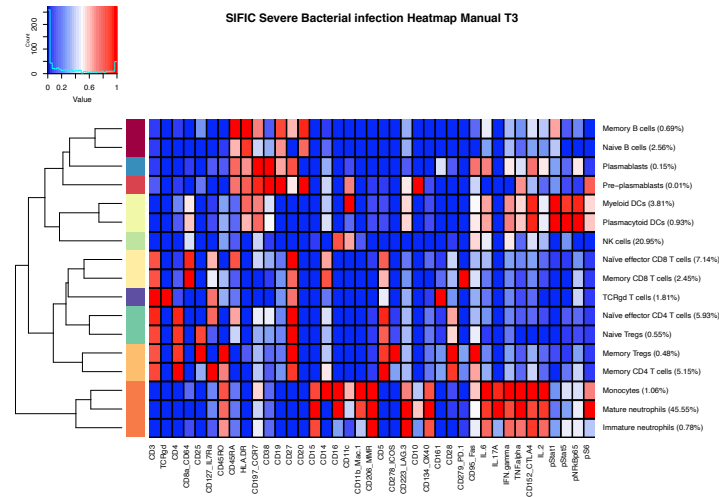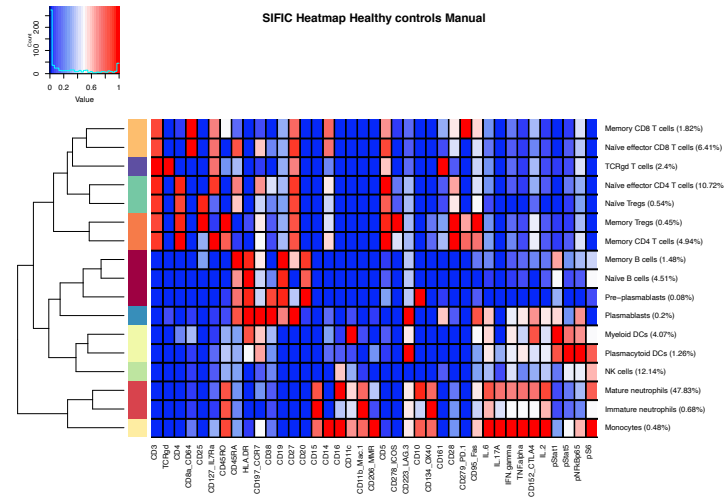





**Supplementary Figure 5. Hierarchical clustering for children with no immunomodulation at T1 sampling.** Heatmap displaying protein expression and cell proportion data that associated with disease group (b) with disease groups clustered as columns (Ward's hierarchical clustering).

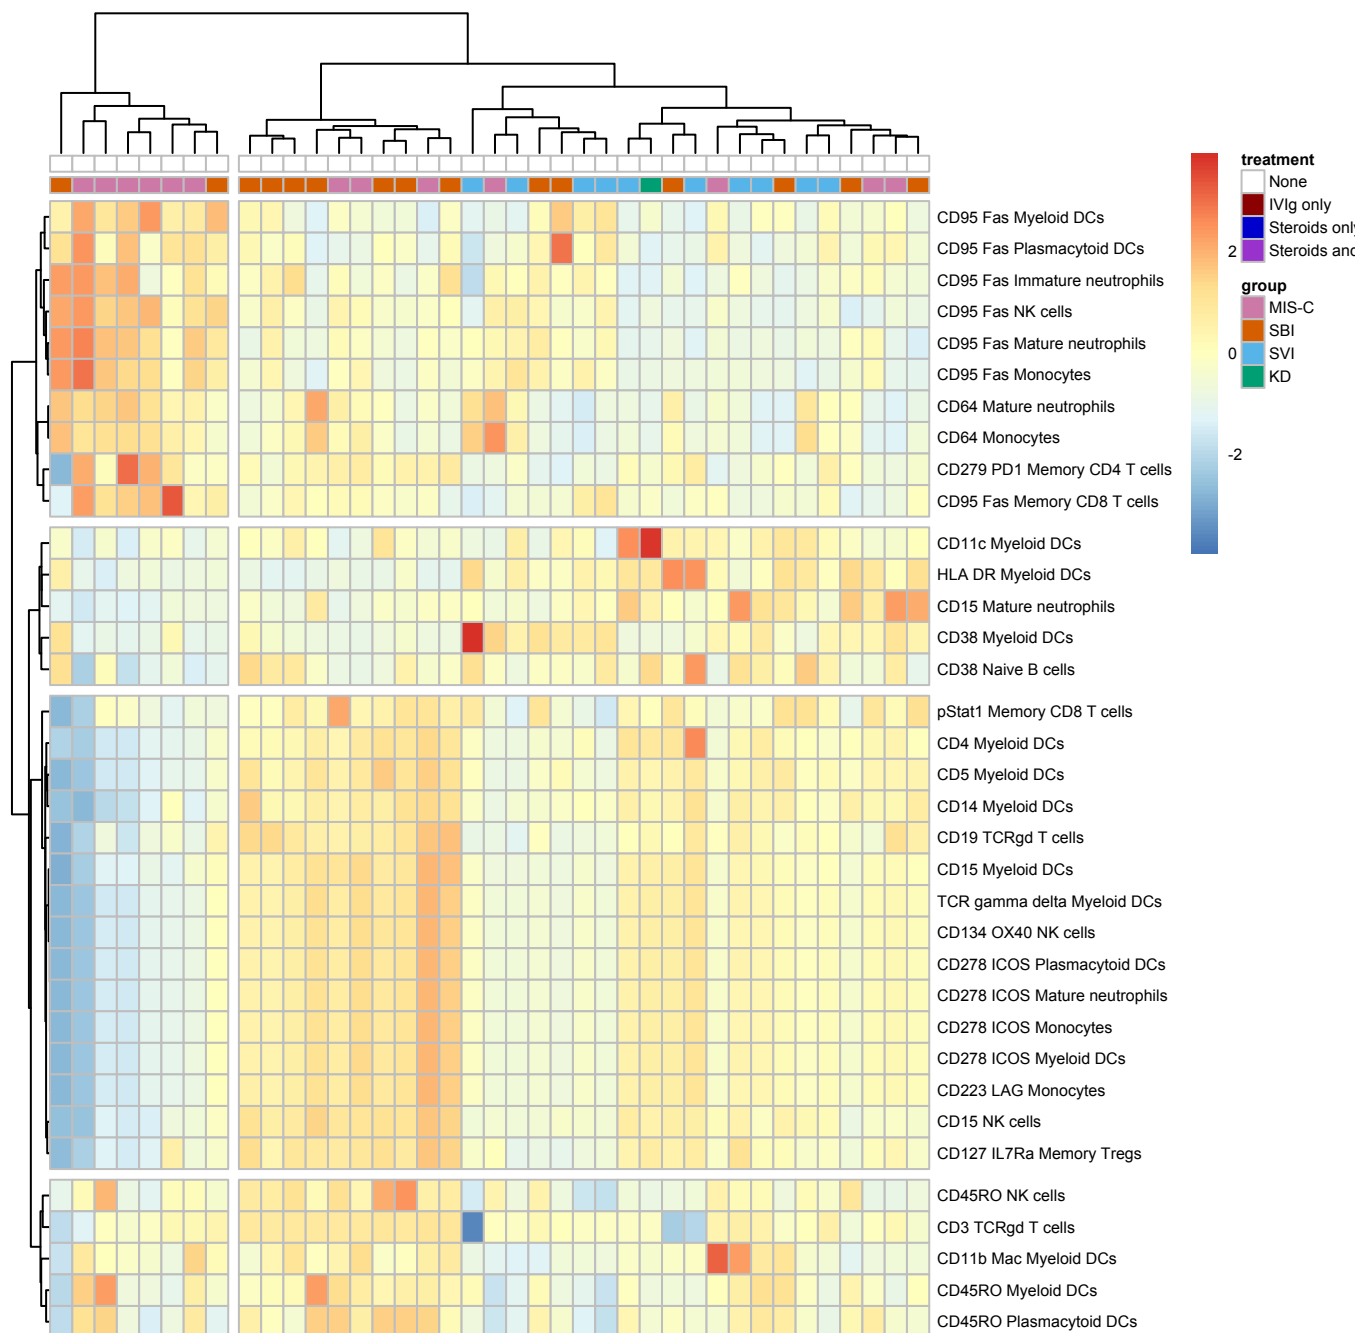

**Supplementary Figure 6.** MOFA of immune features from immunophenotyping shows differences between disease groups and key factors of protein expression and cell proportion features in acute (T1) disease and over the trajectory of illness. **a**, Variance in data by MOFA Factor, and contribution to the variance by the immune cell proportion data and the cell population expression data. **b**, Relative contribution of features to the top four factors derived from MOFA. **c**, Correlation of Factors to disease group and time point. **d**, Correlation of Factors to Cluster 1 and 2 (from Figure 2c) \* $p < 0.05$ , \*\* $p < 0.01$ , \*\*\* $p < 0.001$ , \*\*\*\* $p < 0.0001$ . Data shown are normalized to the median value for HPCs.

a

|              | Variance explained |             |                 |
|--------------|--------------------|-------------|-----------------|
|              | Expression         | Proportions | Total by Factor |
| Factor 1     | 17.8%              | 18.2%       | 36.0%           |
| Factor 2     | 8.72%              | 15.7%       | 24.4%           |
| Factor 3     | 6.34%              | 6.17%       | 3.84%           |
| Factor 4     | 4.82%              | 1.51%       | 12.5%           |
| Factor 5     | 2.18%              | 2.60%       | 4.78%           |
| <b>Total</b> | 5.00%              | 10.3%       | 81.5%           |

b

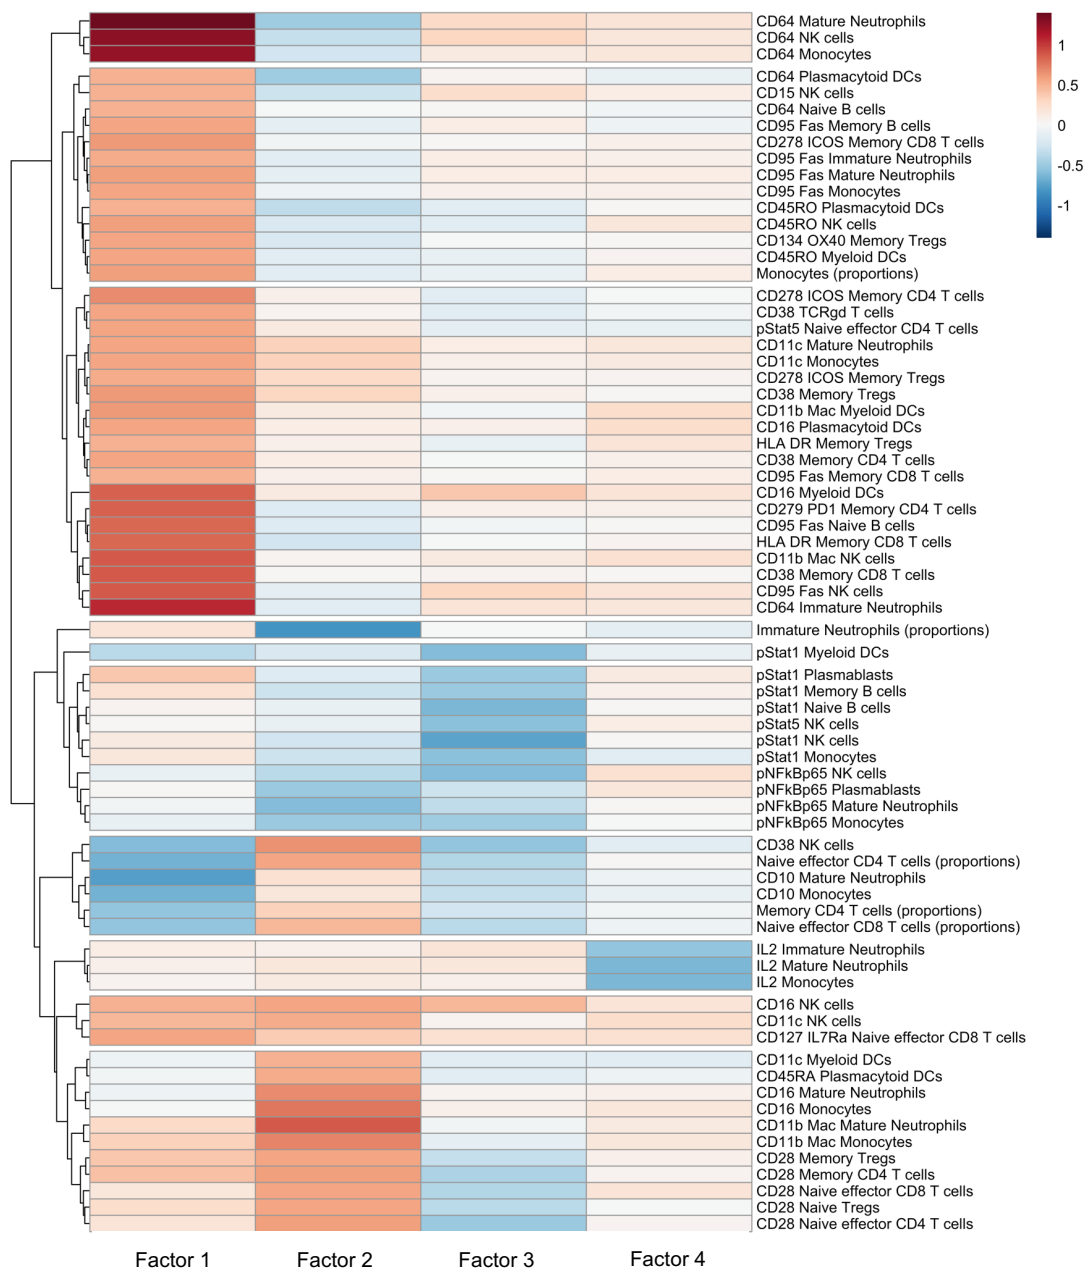

c

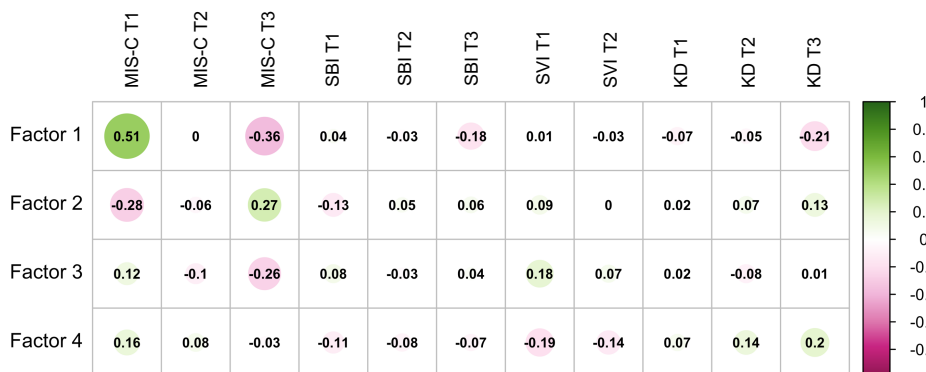

d

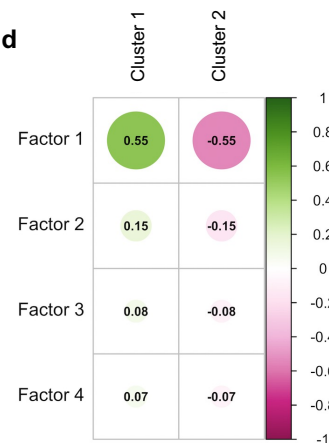

**Supplementary Figure 7.** Factors 1-3 by disease groups and timepoints. **a**, Factor 1 by illness group; **b**, Factor 1 for MIS-C patients over trajectory of illness; **c**, Factor 1 for SBI over trajectory of illness. **d**, Factor 2 by disease group; **e**, Factor 2 for MIS-C patients over trajectory of illness; **f**, Factor 2 for SBI over trajectory of illness. **g**, Factor 3 by disease group; **h**, Factor 3 for MIS-C patients over trajectory of illness; **i**, Factor 3 for SBI over trajectory of illness. **j**, GLM for association of inflammation severity (C-reactive protein concentration) with Factors 1–4 by illness group.

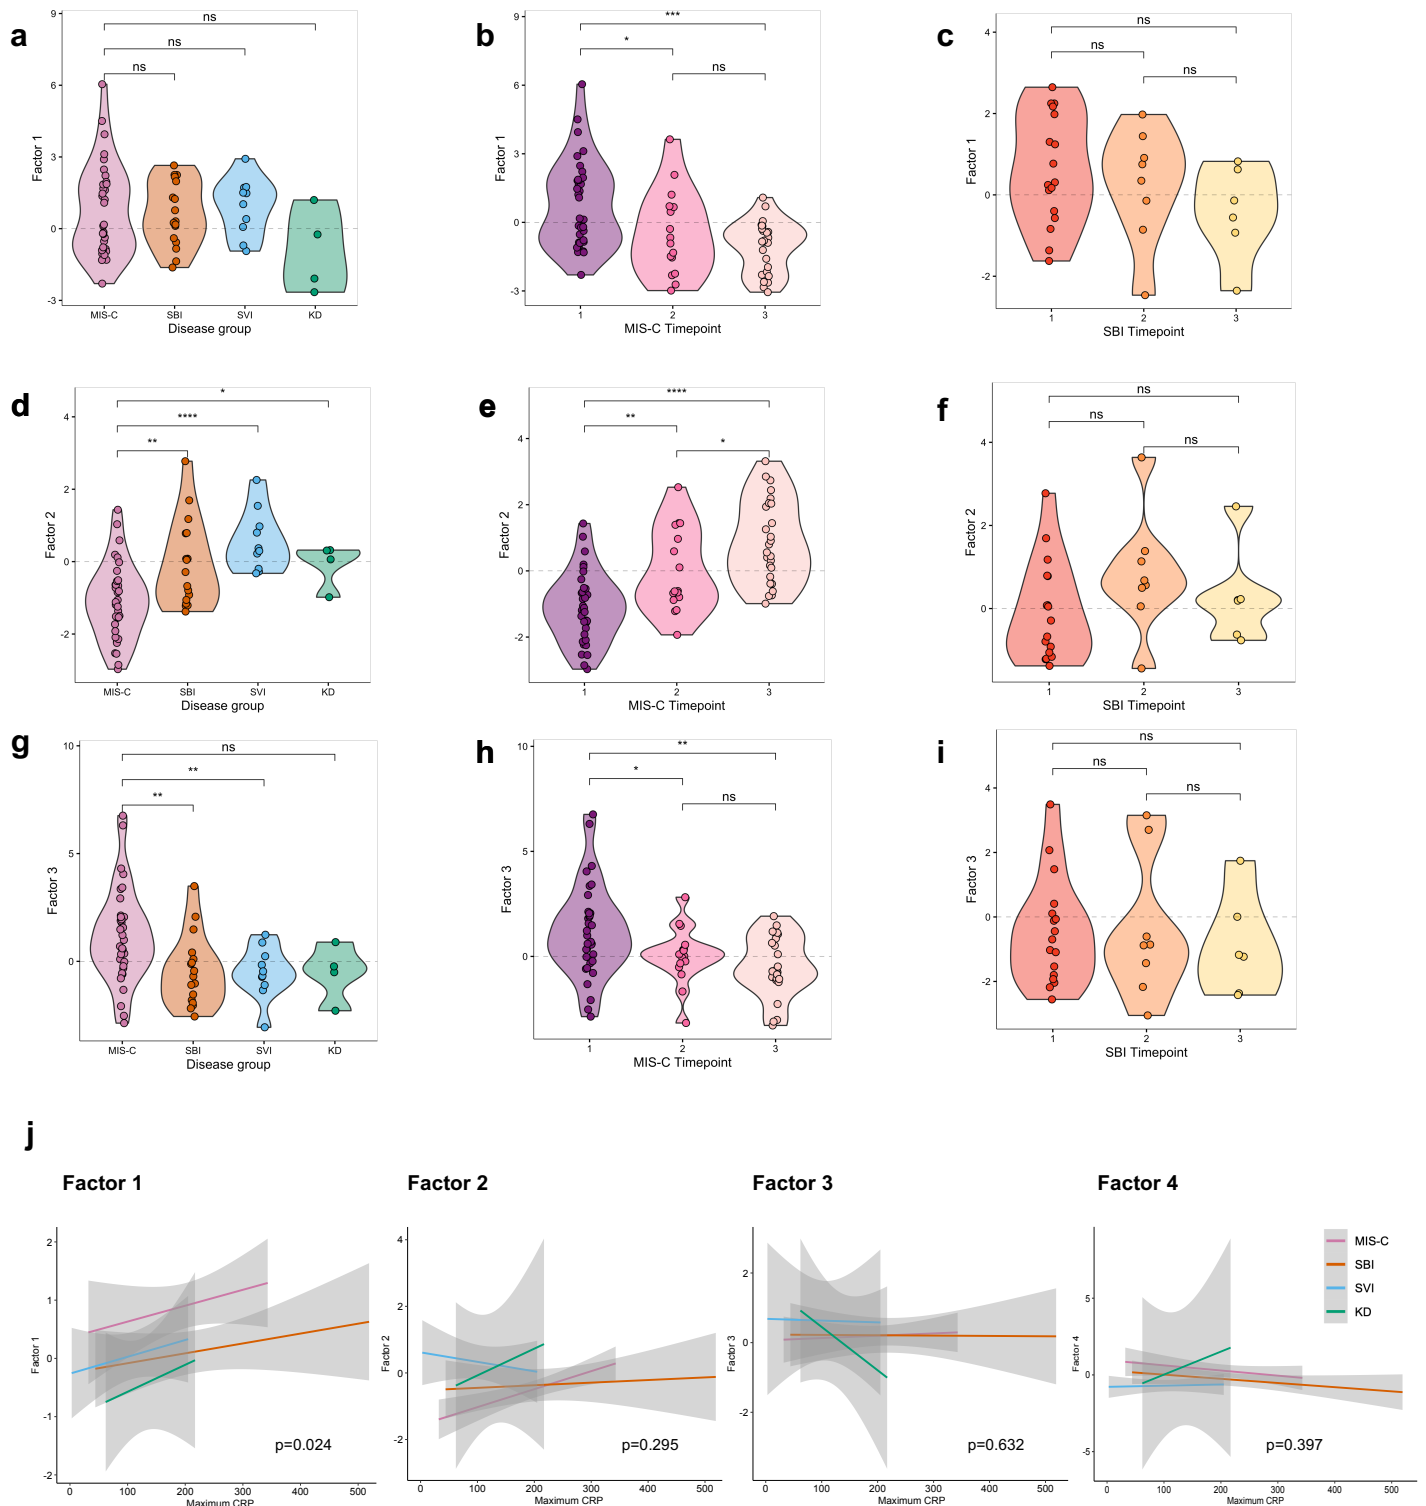

**Supplementary Figure 8.** Markers of immune cell activation and return to baseline in innate immune cells (mature neutrophils, immature neutrophils, monocytes, myeloid DCs, plasmacytoid DCs, CD4 memory T cells, CD8 memory T cells, memory regulatory T cells). Timepoints included are T1 (acute), T2 (defervescence) and T3 (convalescence). For all figures, patients with MIS-C are represented in shades of purple for T1–T3 and patients with SBI are represented with shades of orange for T1–T3. P values for pairwise-comparisons across time are using Wilcoxon rank sum testing.

## Innate immune cells

**a, Mature neutrophils.** Mature neutrophil proportions, CD64 FcγRI, CD95 Fas, CD28, CD11b Mac, CD10.

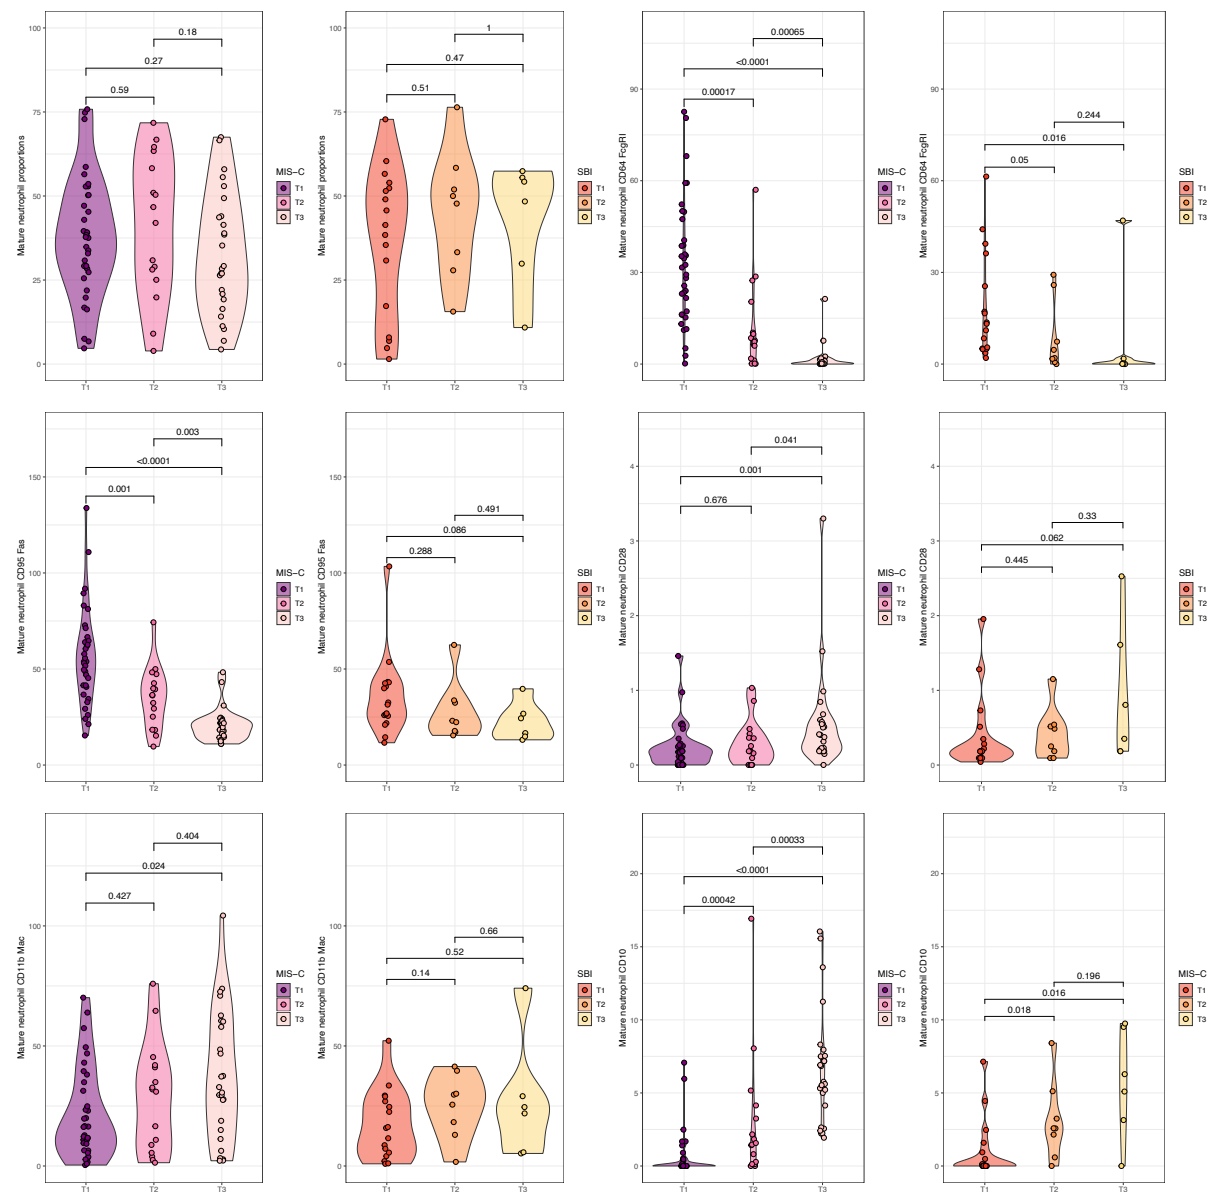

**b, Immature neutrophils.** Immature neutrophil proportions, CD64 FcγRI, CD95 Fas, CD28, CD11b Mac, CD10.

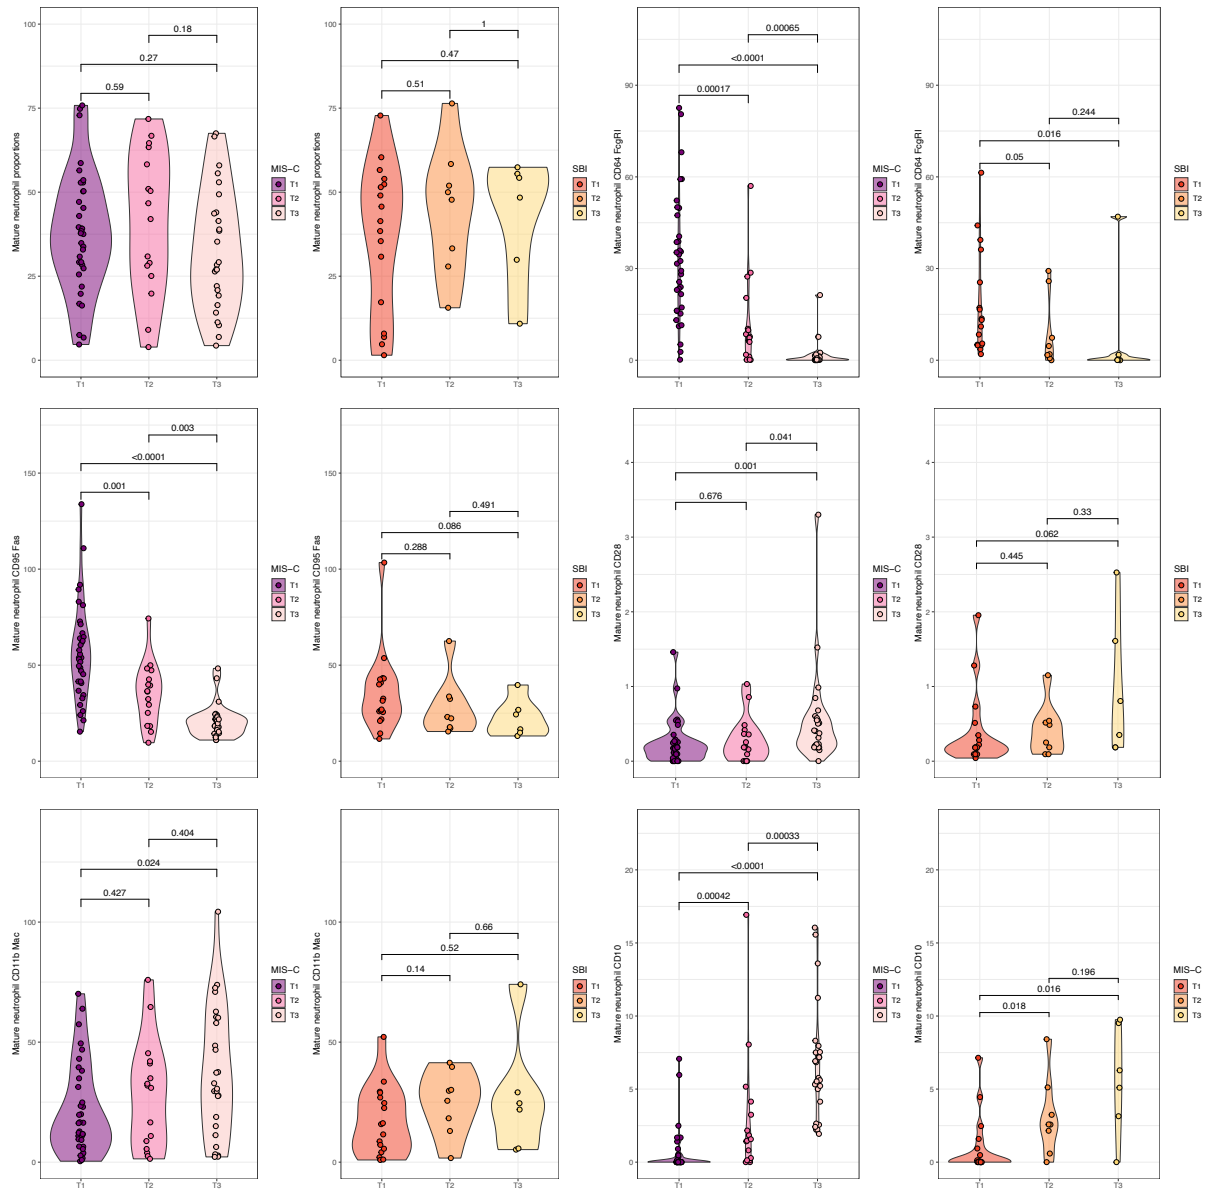

# c, Monocytes. CD64 FcγRI, CD95 Fas, CD16, HLA-DR, CD28, CD10.

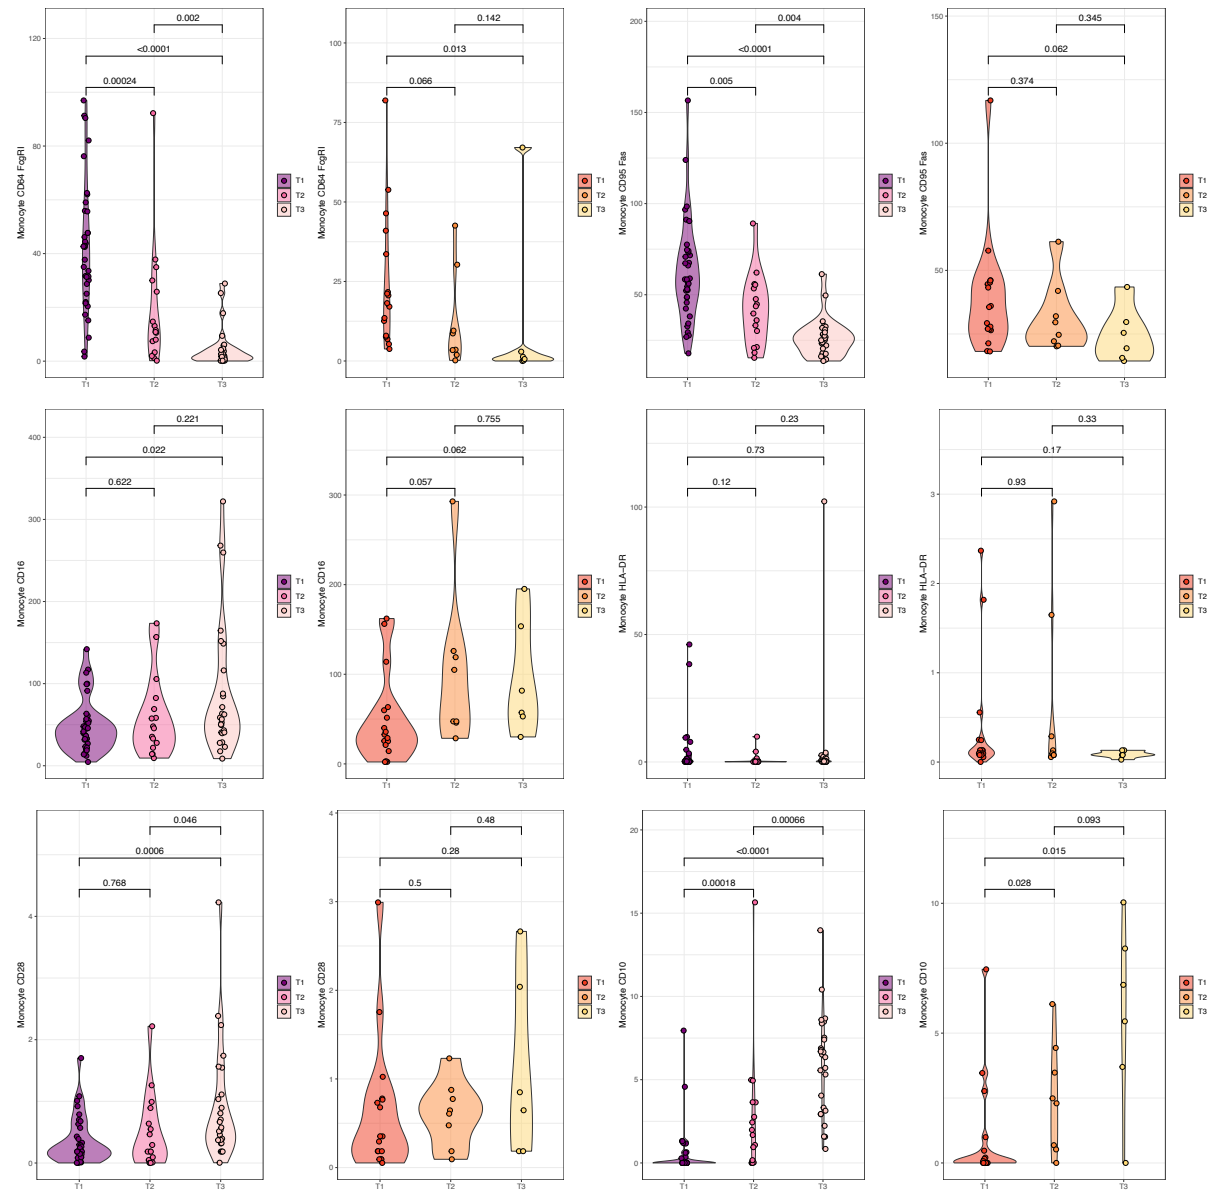

## d, Myeloid DCs. CD64 FcγRI, CD95 Fas, CD16, HLA-DR, TNFα, IL6, IL2.

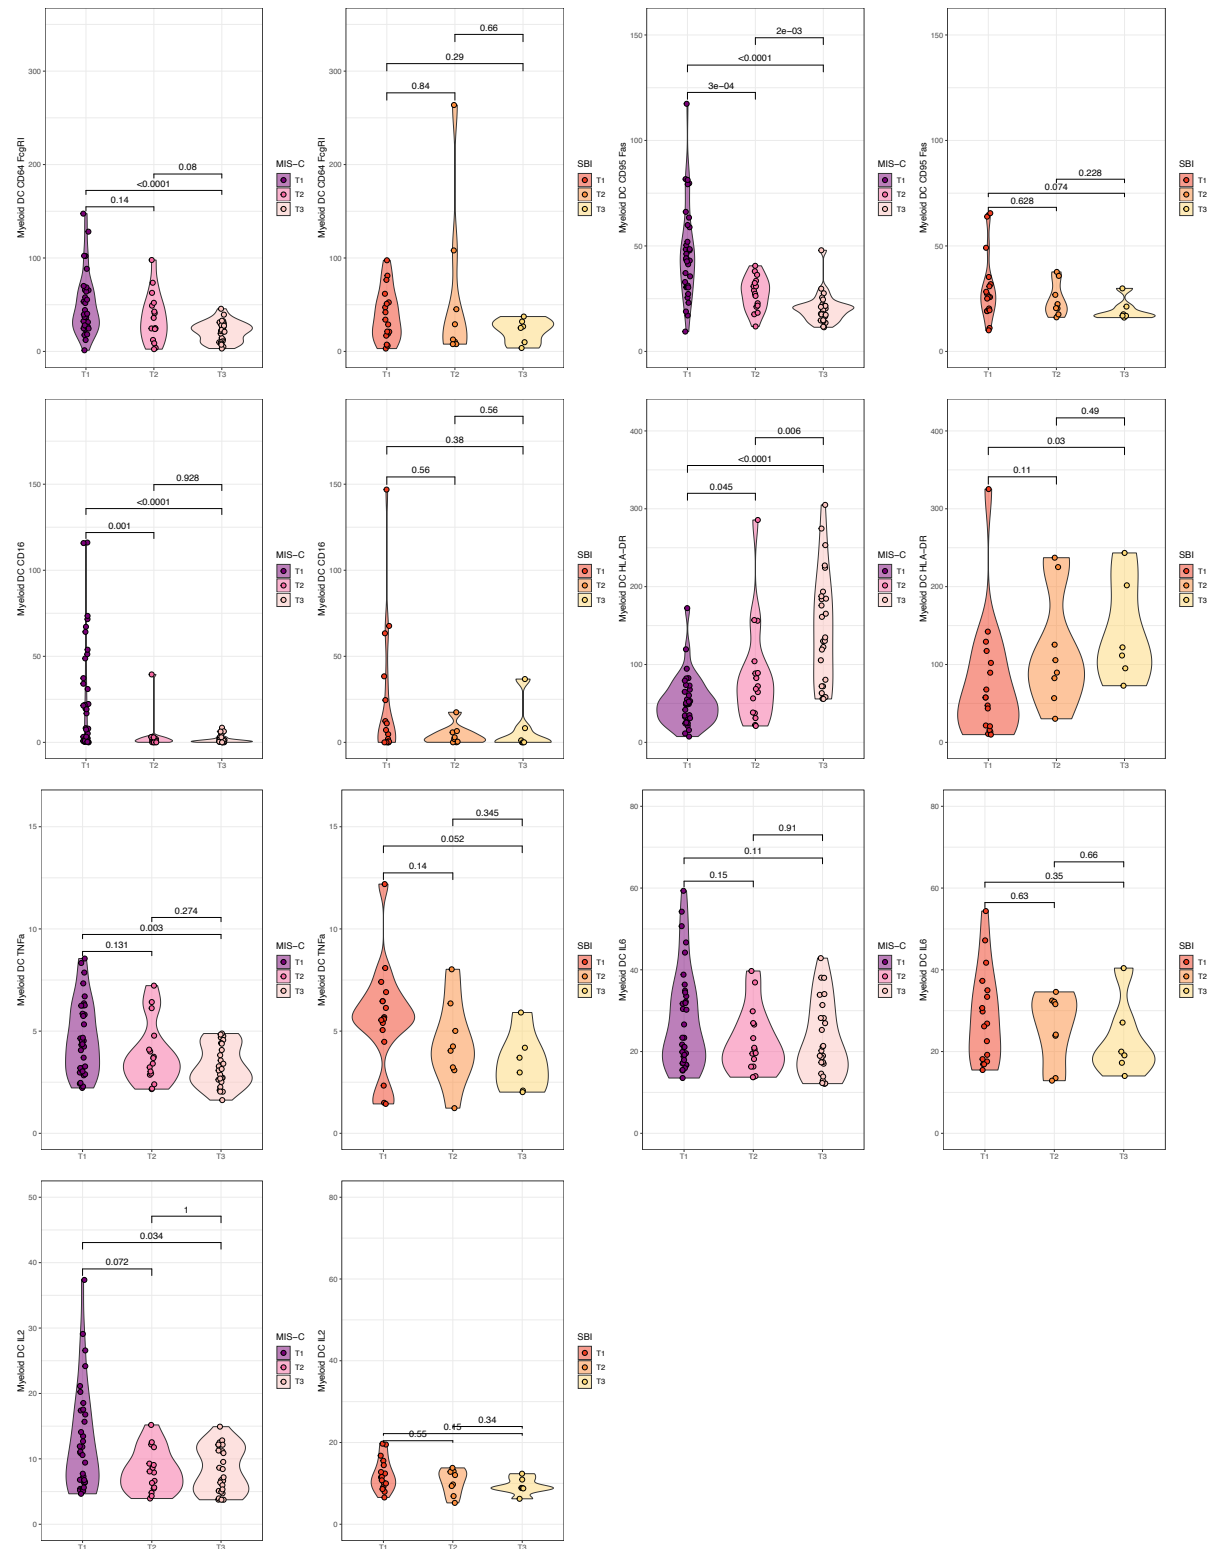



**e, Plasmacytoid DCs. CD64 FcγRI, CD95 Fas, TNFα, IL6, IFNγ, pSTAT1, pSTAT5.**

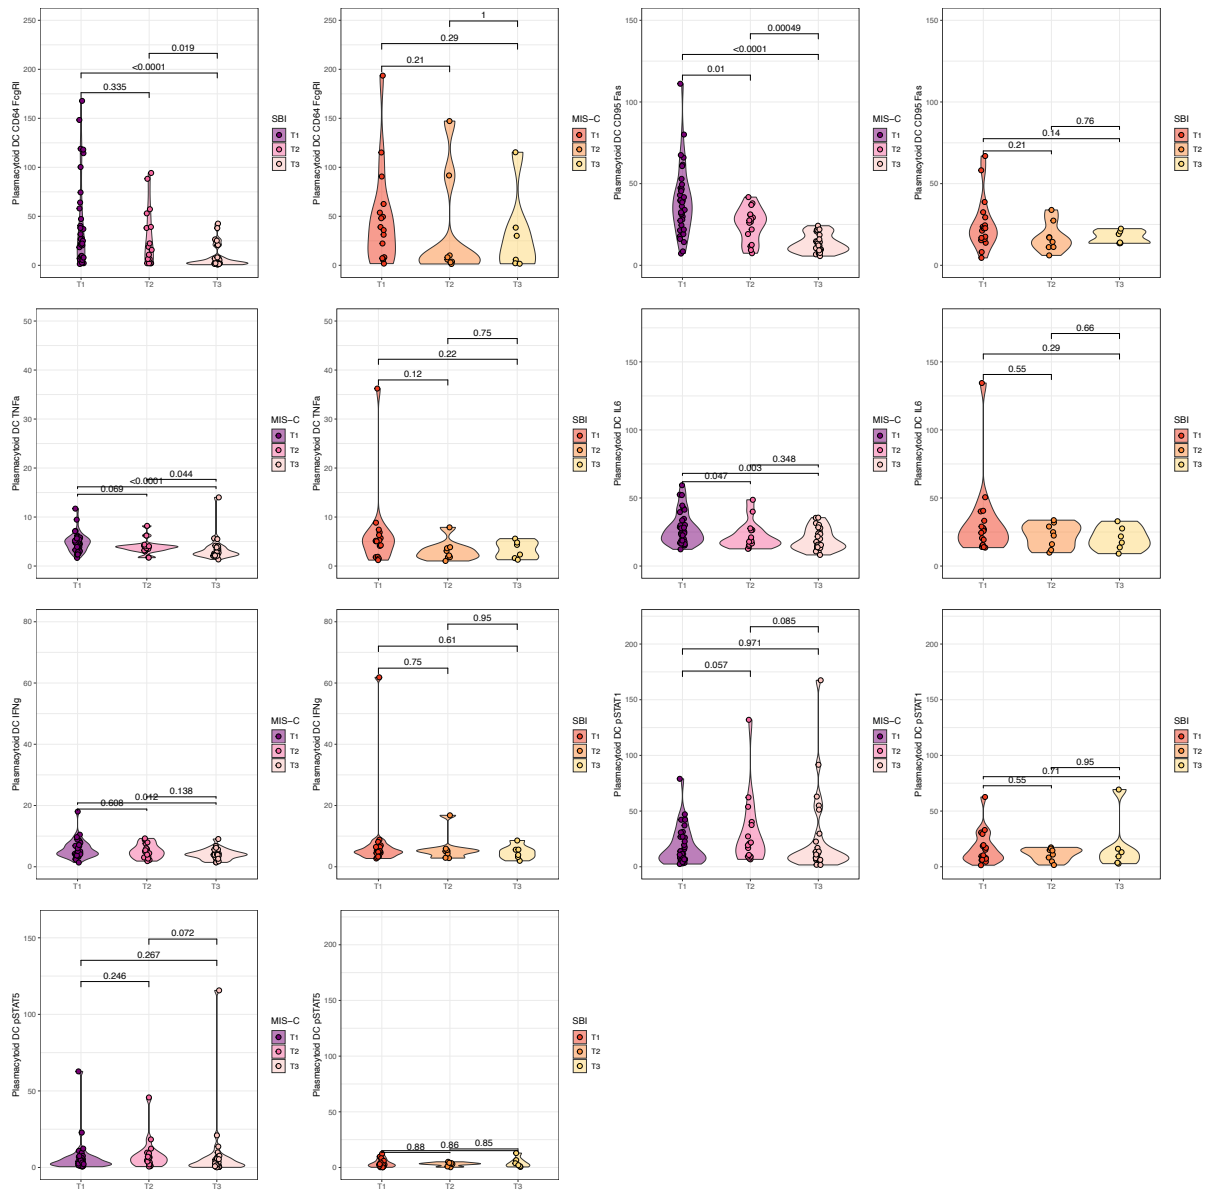

## **Adaptive immune cells**

**f, Memory CD4 T cells.** HLA-DR, CD38, CD279 PD1, CD152 CTLA4, CD223 LAG3, CD278 ICOS, CD134 OX40, CD95 Fas, pSTAT1, pSTAT5, pNFκBp65, PS6, IFNγ, TNFα, IL6

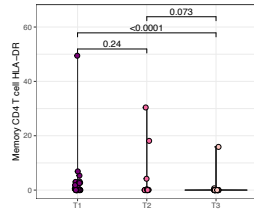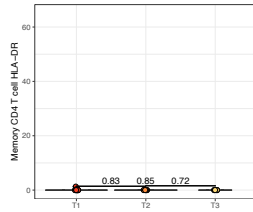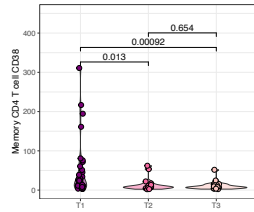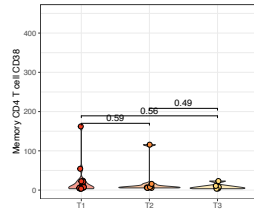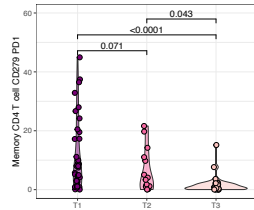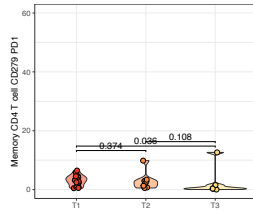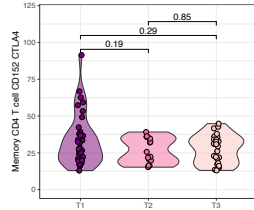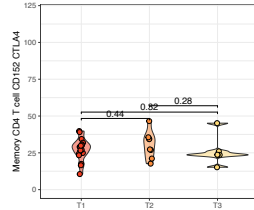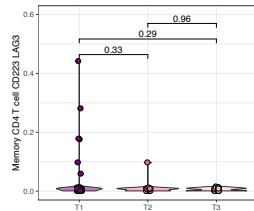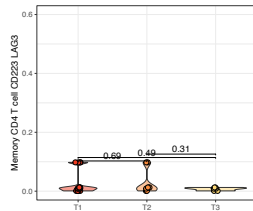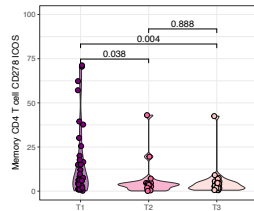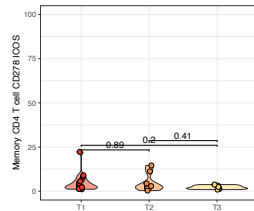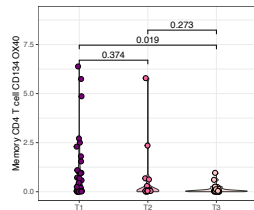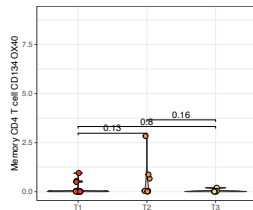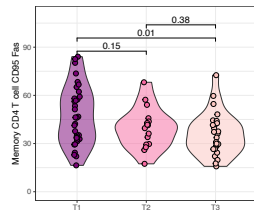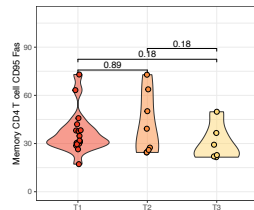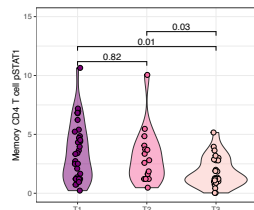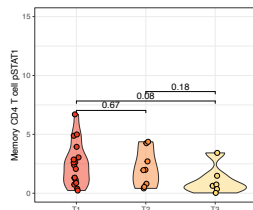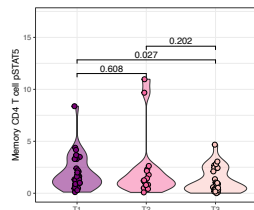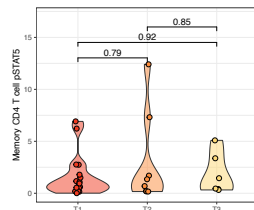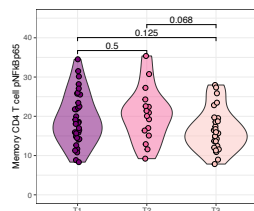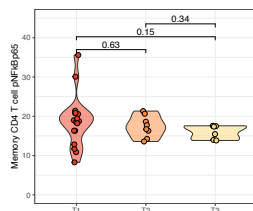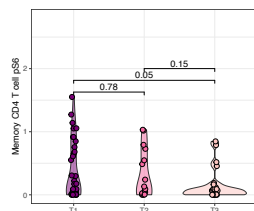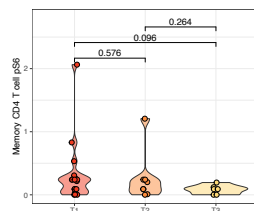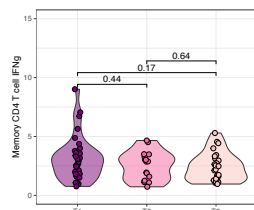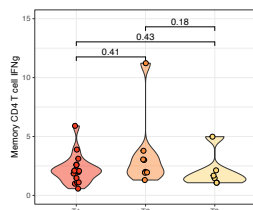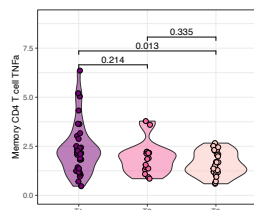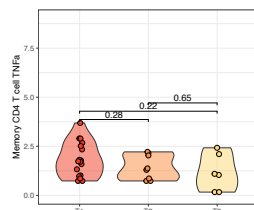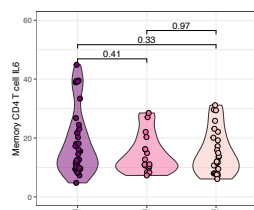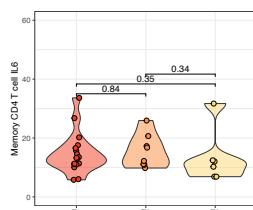

**g, Memory CD8 T cells.** HLA-DR, CD38, CD279 PD1, CD152 CTLA4, CD223 LAG3, CD278 ICOS, CD134 OX40, CD95 Fas, pSTAT1, pSTAT5, pNFκBp65, PS6, IFNγ, TNFα, IL6.

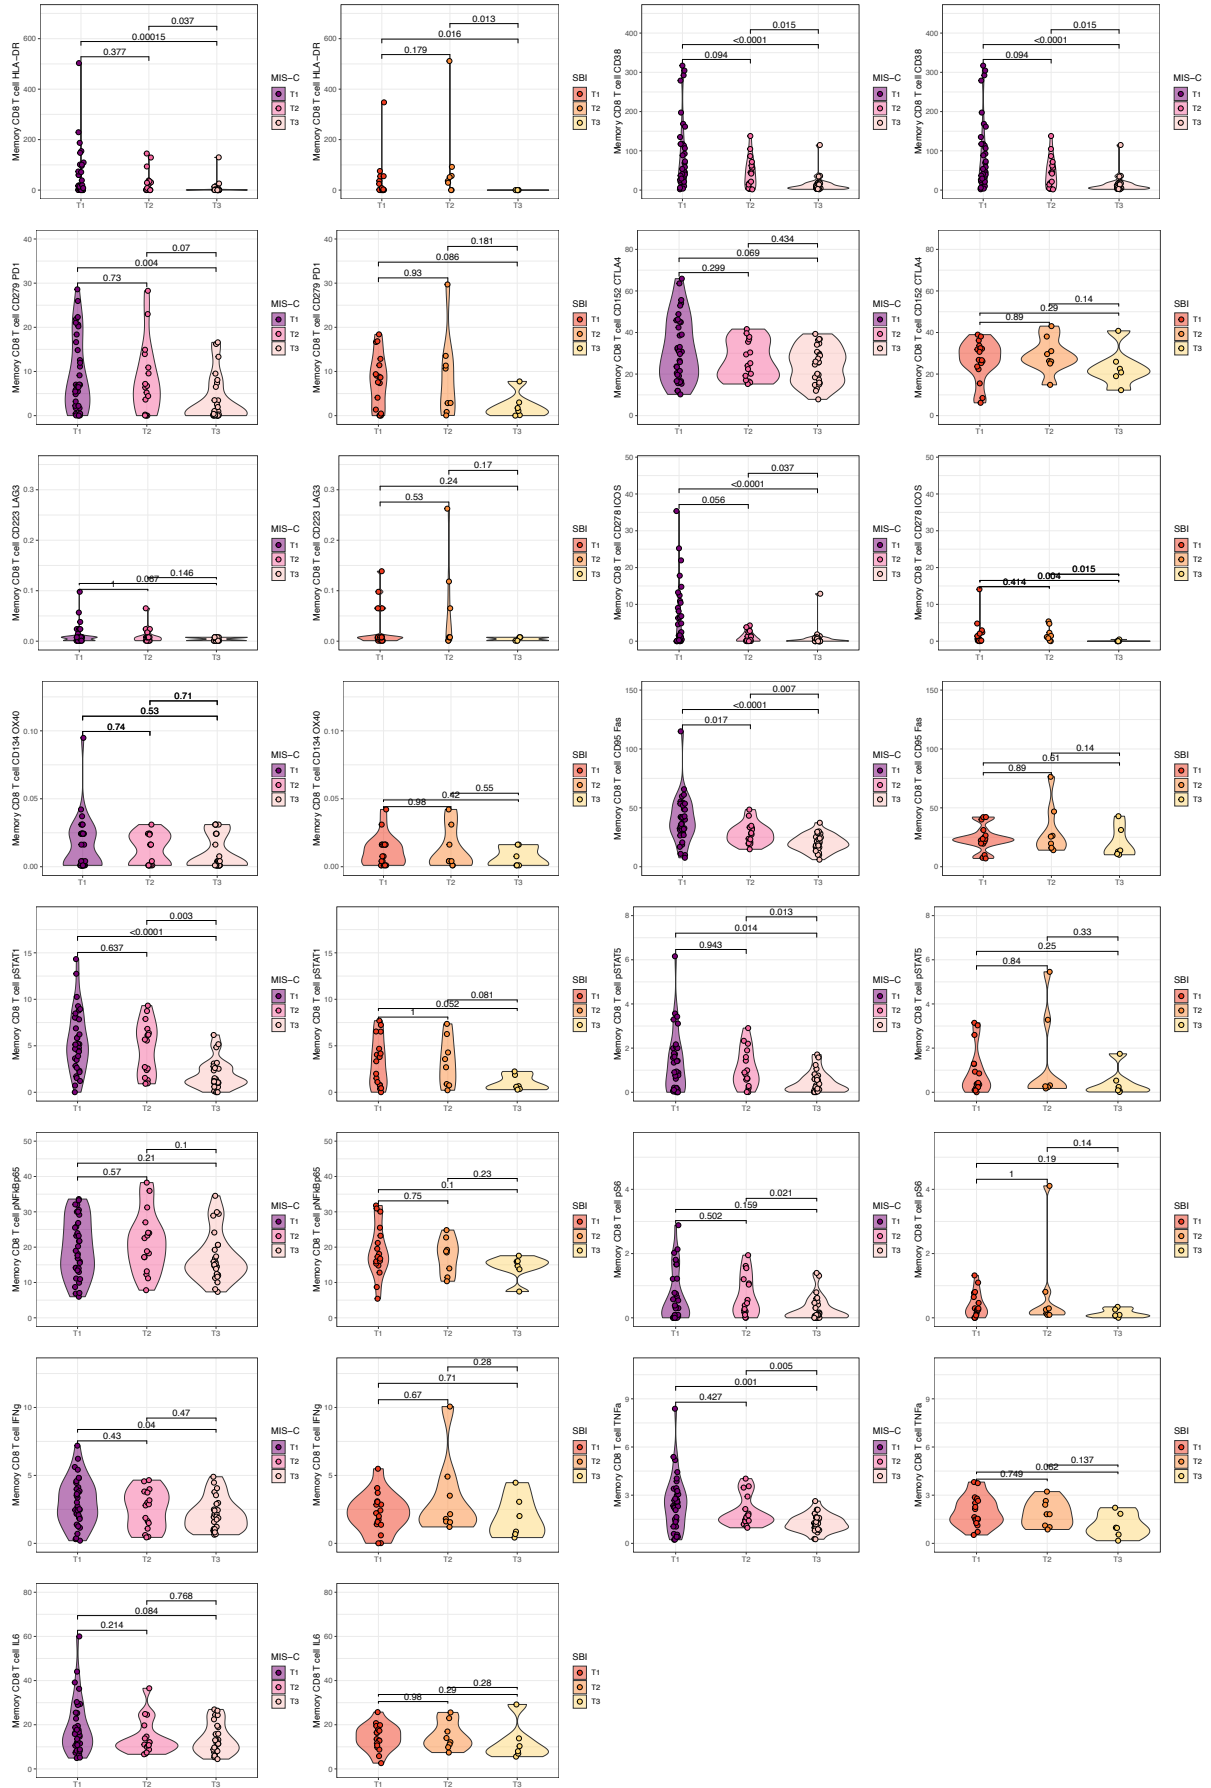

**h, Memory regulatory T cells.** HLA-DR, CD38, CD279 PD1, CD152 CTLA4, CD223 LAG3, CD278 ICOS, CD134 OX40, CD95 Fas, HLA-DR, CD45RApSTAT1, pSTAT5.

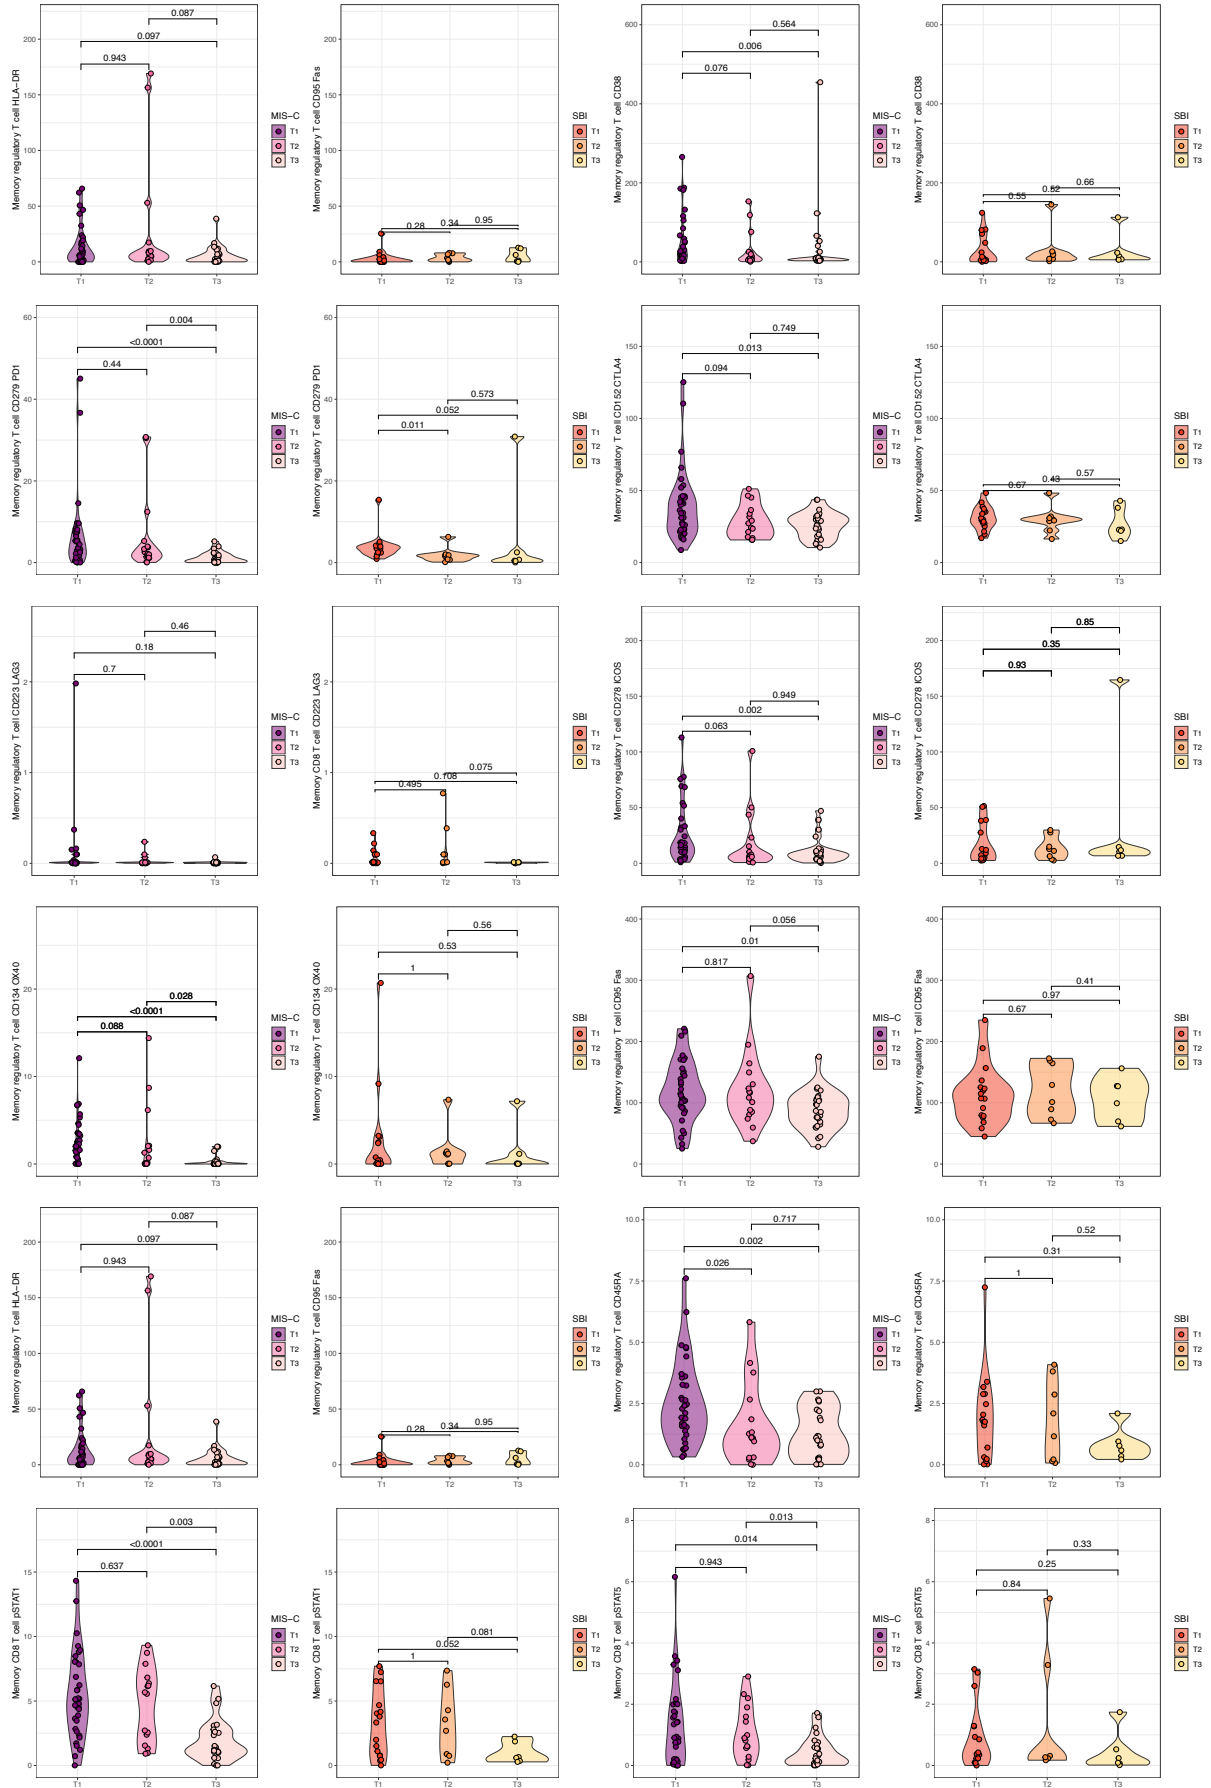

**Supplementary Figure 9. a, Markers of T cell activation, exhaustion and apoptosis in memory CD4 T cells.** Co-expression of HLA-DR, CD38, CD279 (PD-1) with CD152 (CTLA4), CD223 (LAG3), CD278 (ICOS), CD134 (OX40), CD95 (Fas), and intracellular IFN $\gamma$  expression in memory CD4 T cells in all children with at T1, T2 and T3 (colored by illness group). P-values and adjusted R-squared values are for all observations (regardless of illness group).

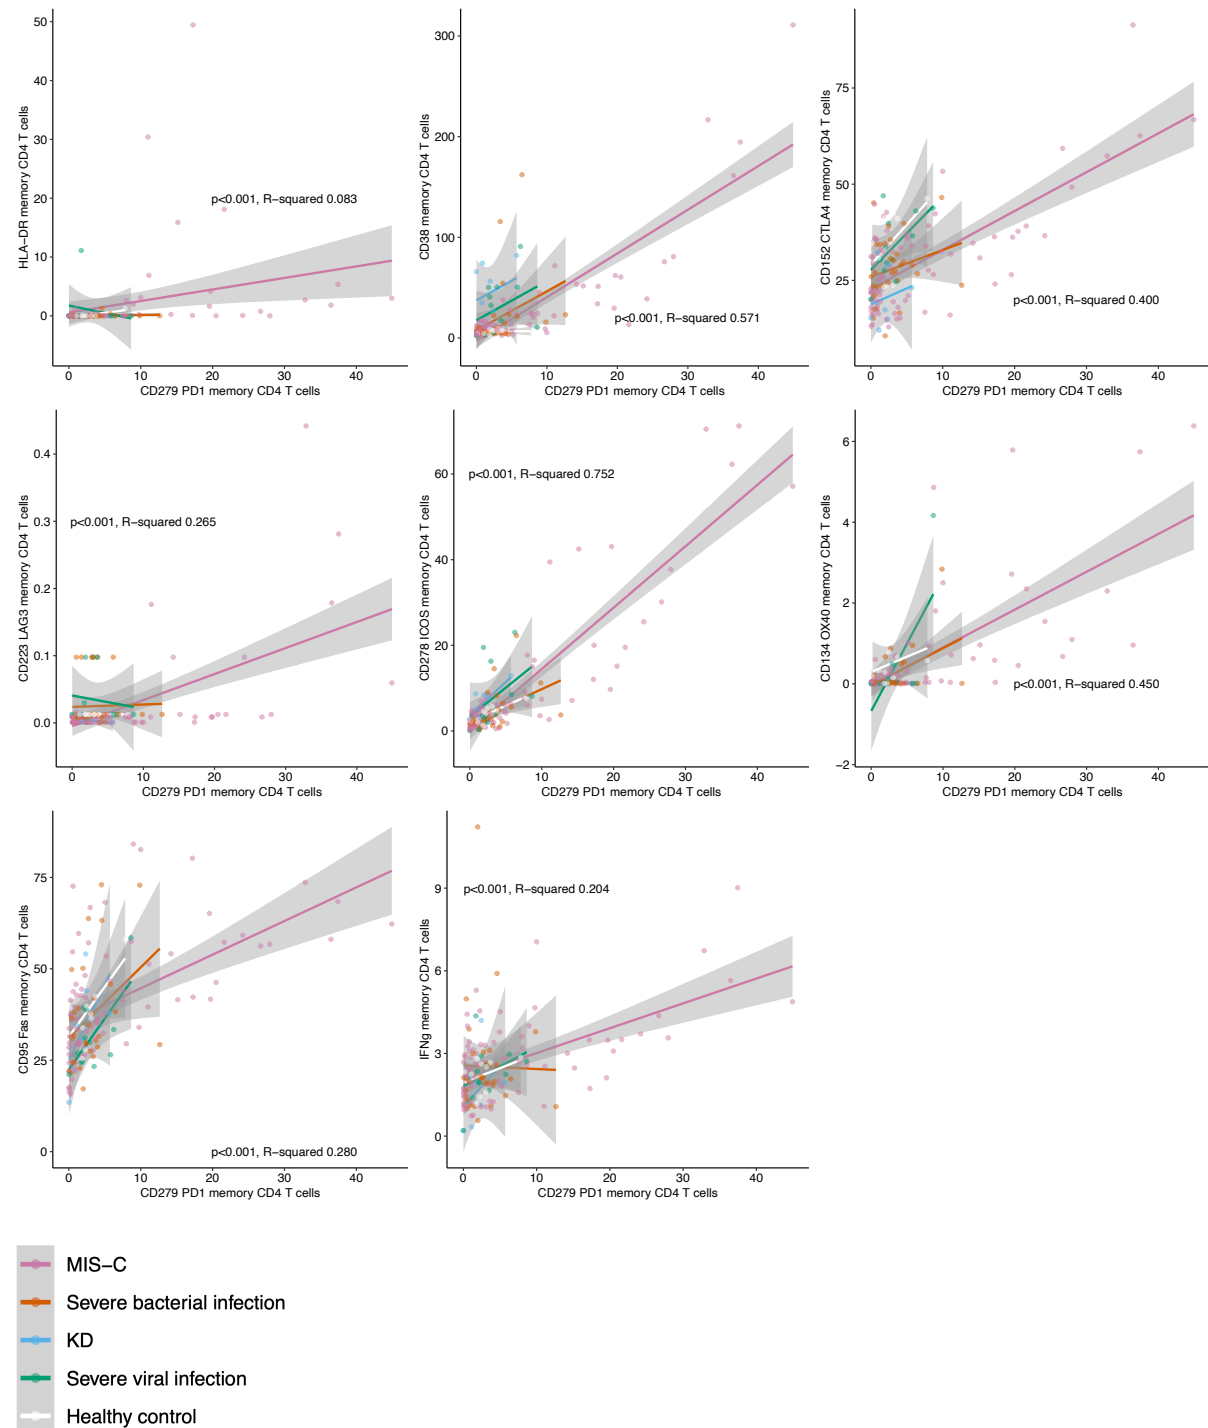



**b, Markers of T cell activation, exhaustion and apoptosis in memory CD8 T cells.** Co-expression of CD279 (PD-1) with CD152 (CTLA4), CD223 (LAG3), CD278 (ICOS), CD134 (OX40), CD95 (Fas), and the intracellular IFN $\gamma$  in memory CD8 T cells in all children with at T1, T2 and T3 (colored by illness group). P-values and adjusted R-squared values are for all observations (regardless of illness group).

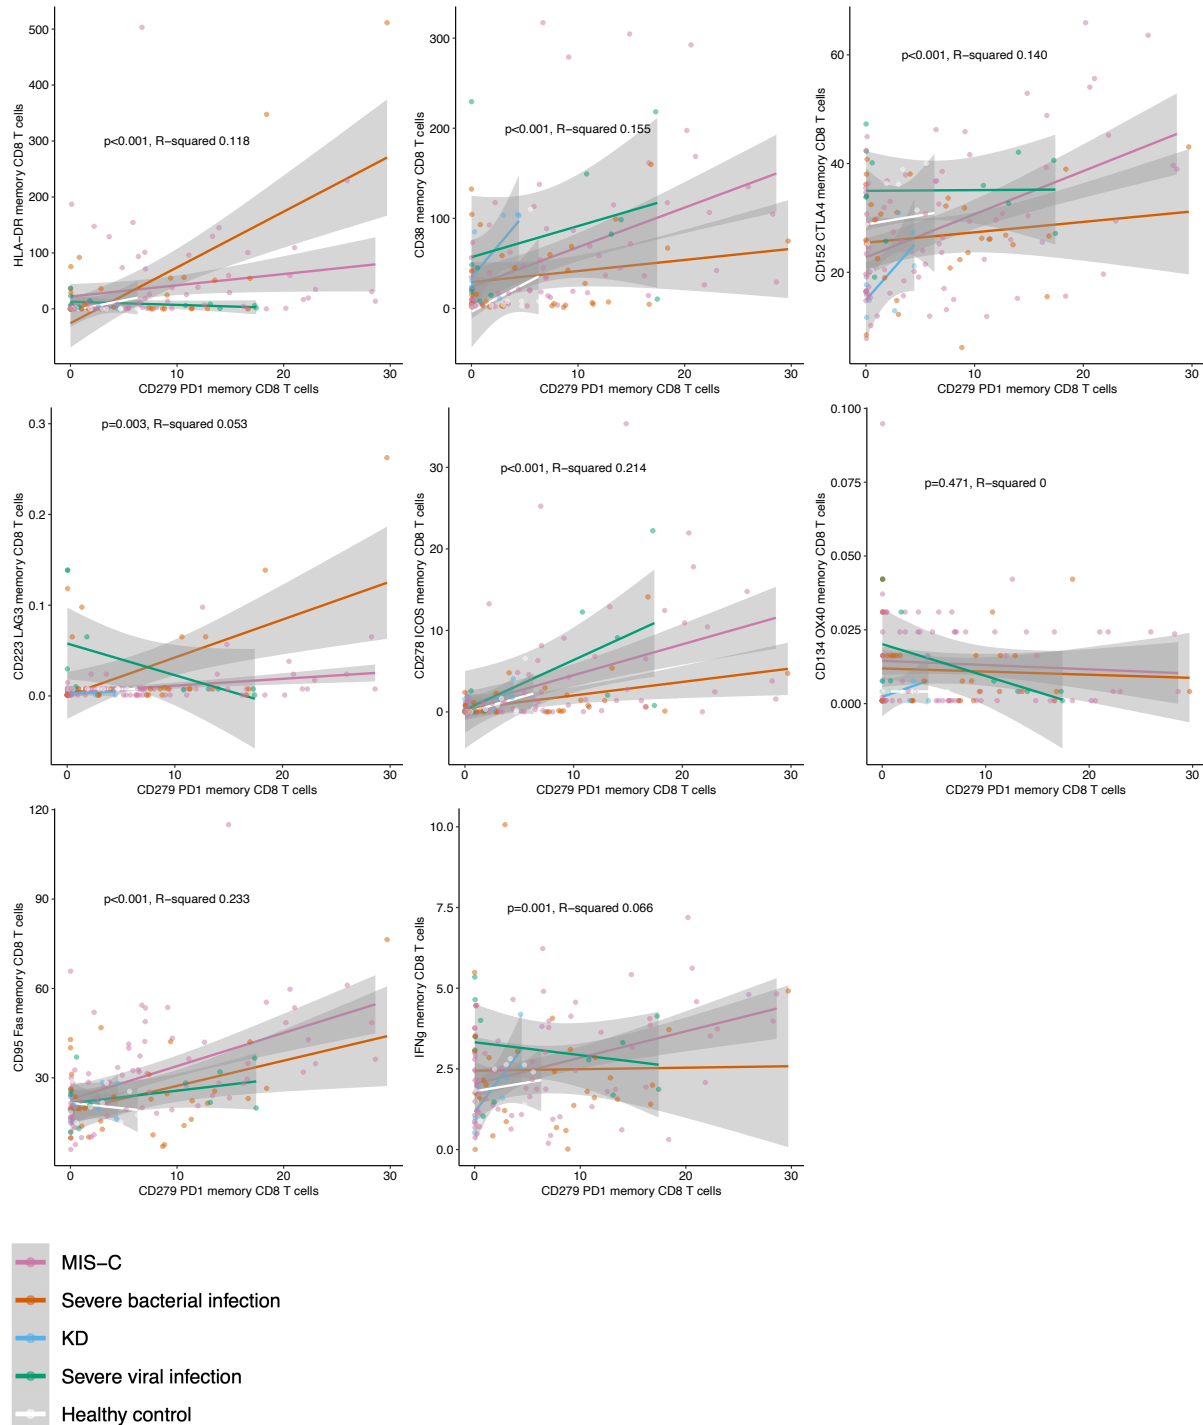

**c, Markers of T cell activation, exhaustion and apoptosis in memory regulatory T cells.** Co-expression of CD279 (PD-1) with CD152 (CTLA4), CD223 (LAG3), CD278 (ICOS), CD134 (OX40), CD95 (Fas) memory regulatory T cells in all children with at T1, T2 and T3 (colored by illness group). P-values and adjusted R-squared values are for all observations (regardless of illness group).

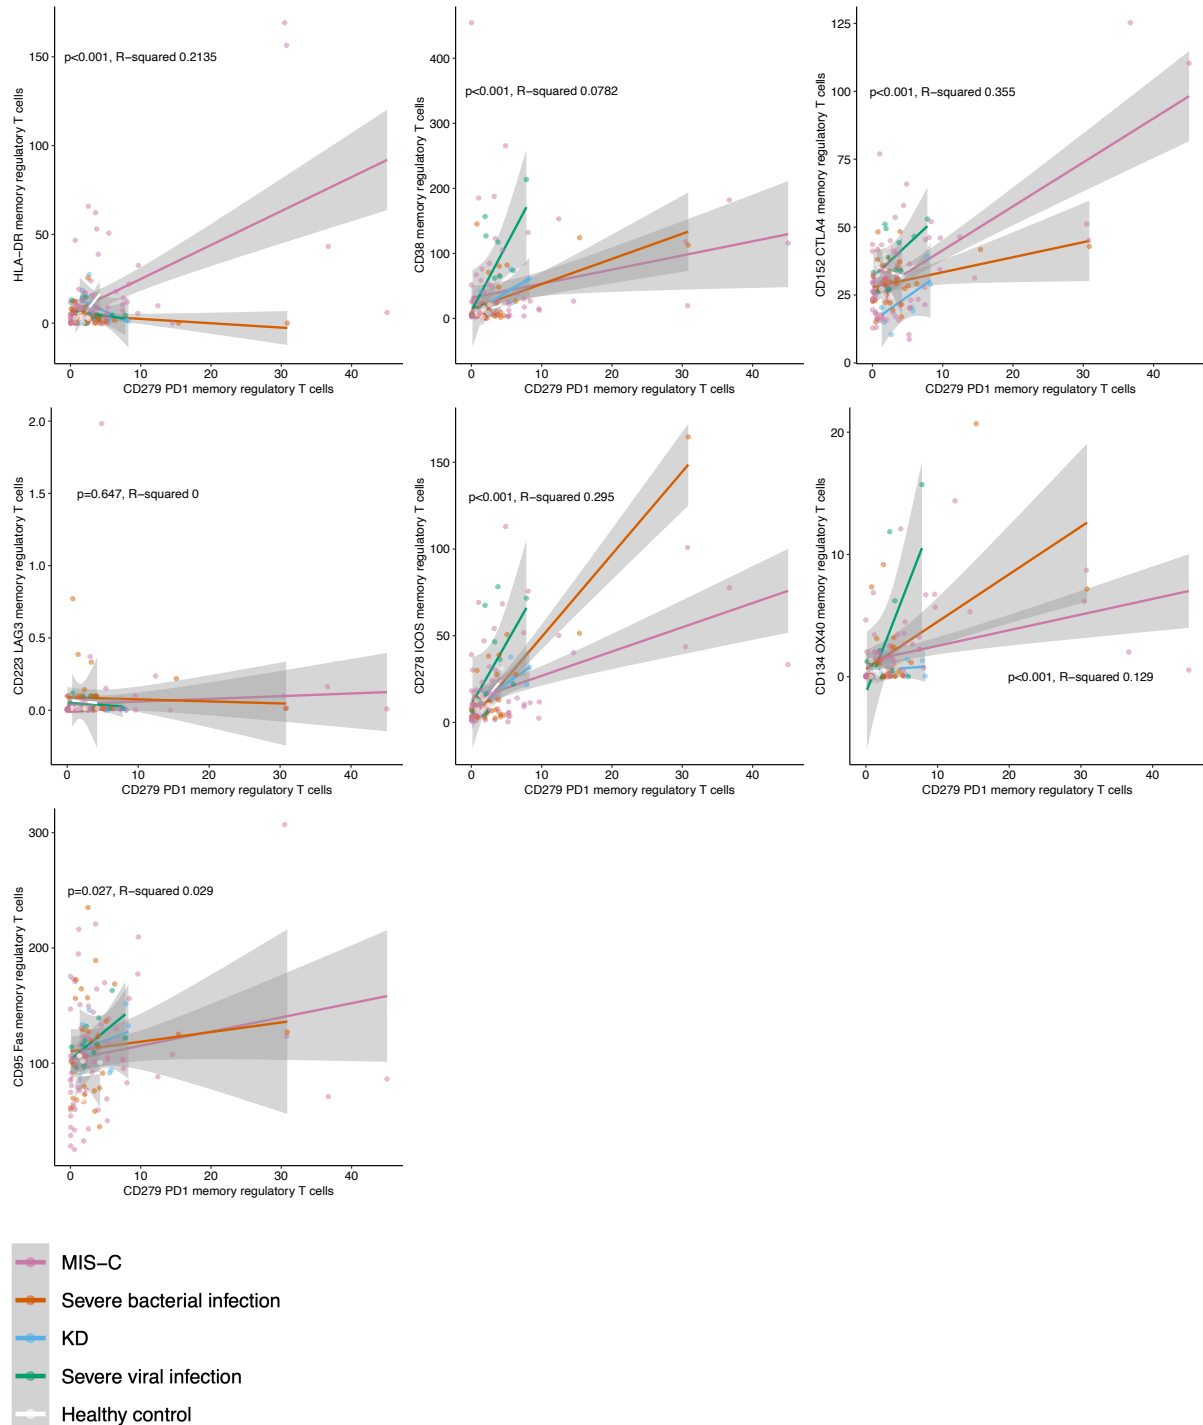

**Supplementary Figure 10. Co-expression of CD279 PD1 with markers of activation, exhaustion and apoptosis in CD4 memory T cells.** Representative examples of CD279 PD-1 expression (x axis, all plots) versus **a**, HLA-DR; **b**, CD38; **c**, CD152 CTLA4; **d**, CD134 OX40, **e**, CD278 ICOS, **f**, CD95 Fas, **g**, intracellular IFN $\gamma$  in memory CD4 T cells and naïve/effector CD4 T cells. Plots show data from T1 from a sample from a child with MIS-C with high expression of CD279 PD1; and a healthy paediatric control sample.

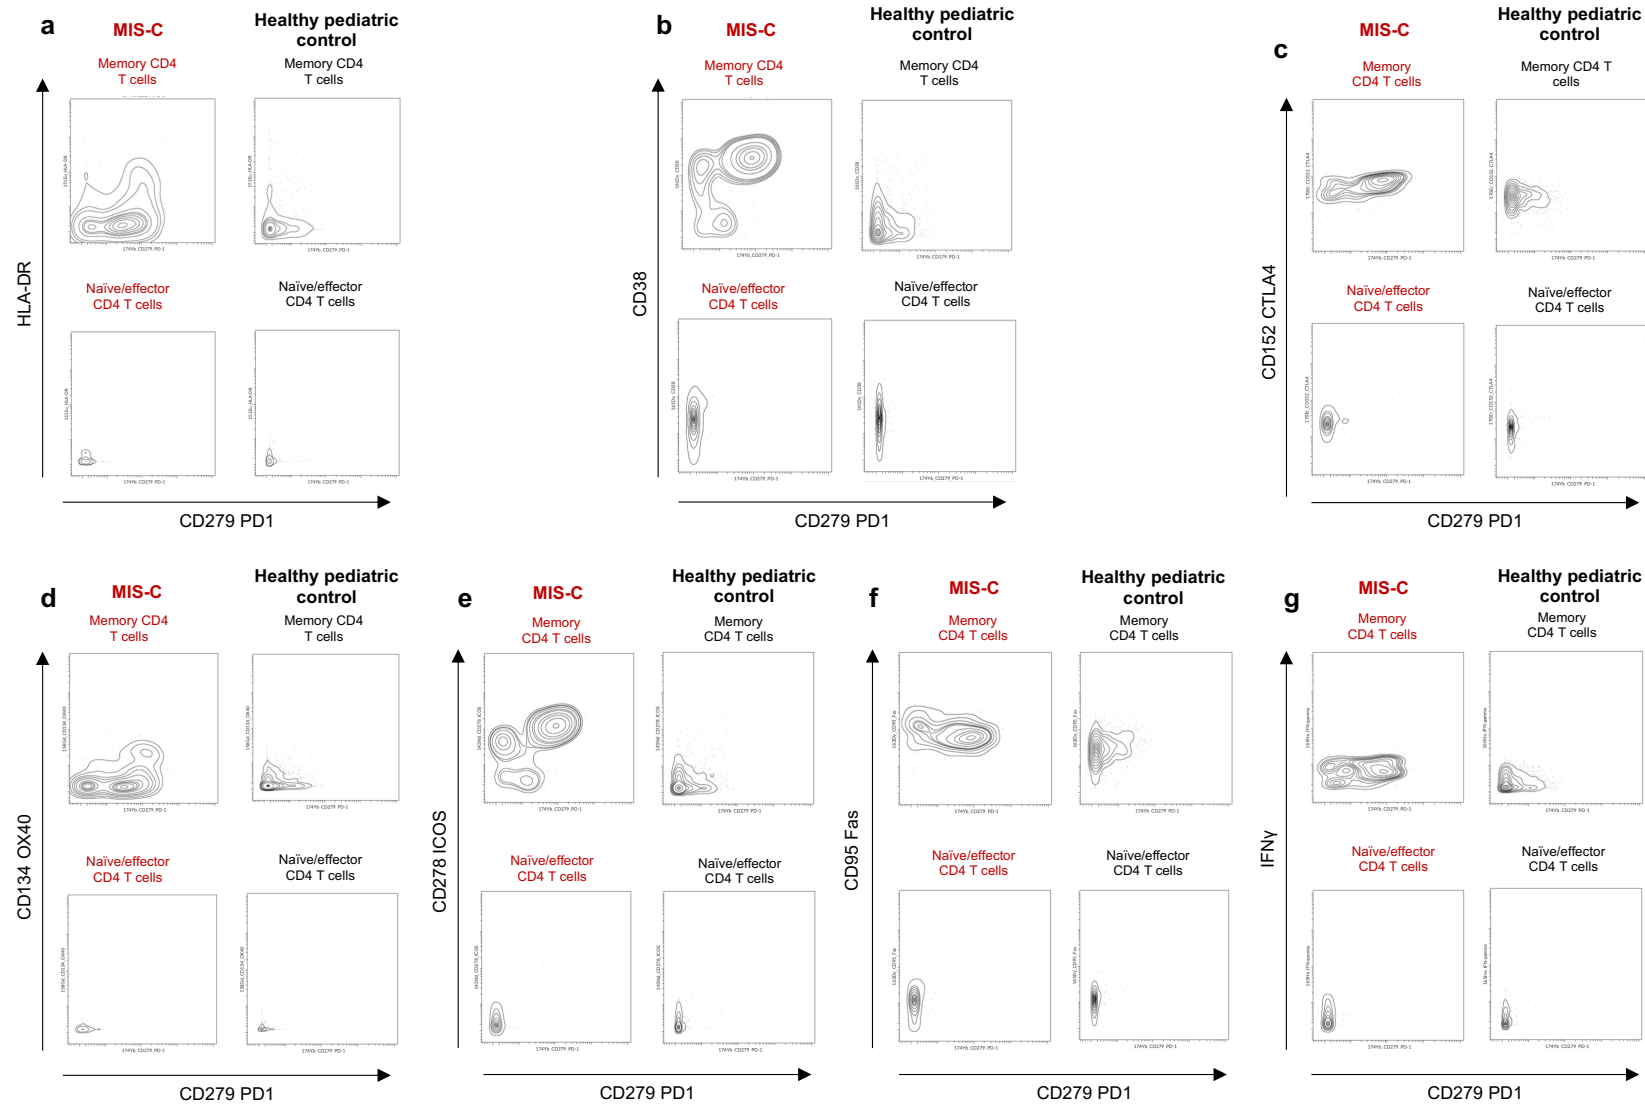

**Supplementary Figure 11.** K-means clustering analysis: effects of immunomodulatory treatment on supernatant cytokines. K-means clustering plots for supernatant cytokines samples with no stimulation (a), stimulation with SARS-CoV-2 antigen (ag1) (b) and stimulation with mitogen (phytohemagglutinin) (c). The clusters and their respective centre points are represented by different colours. The shape of each point represents the treatment received prior to research blood sampling.

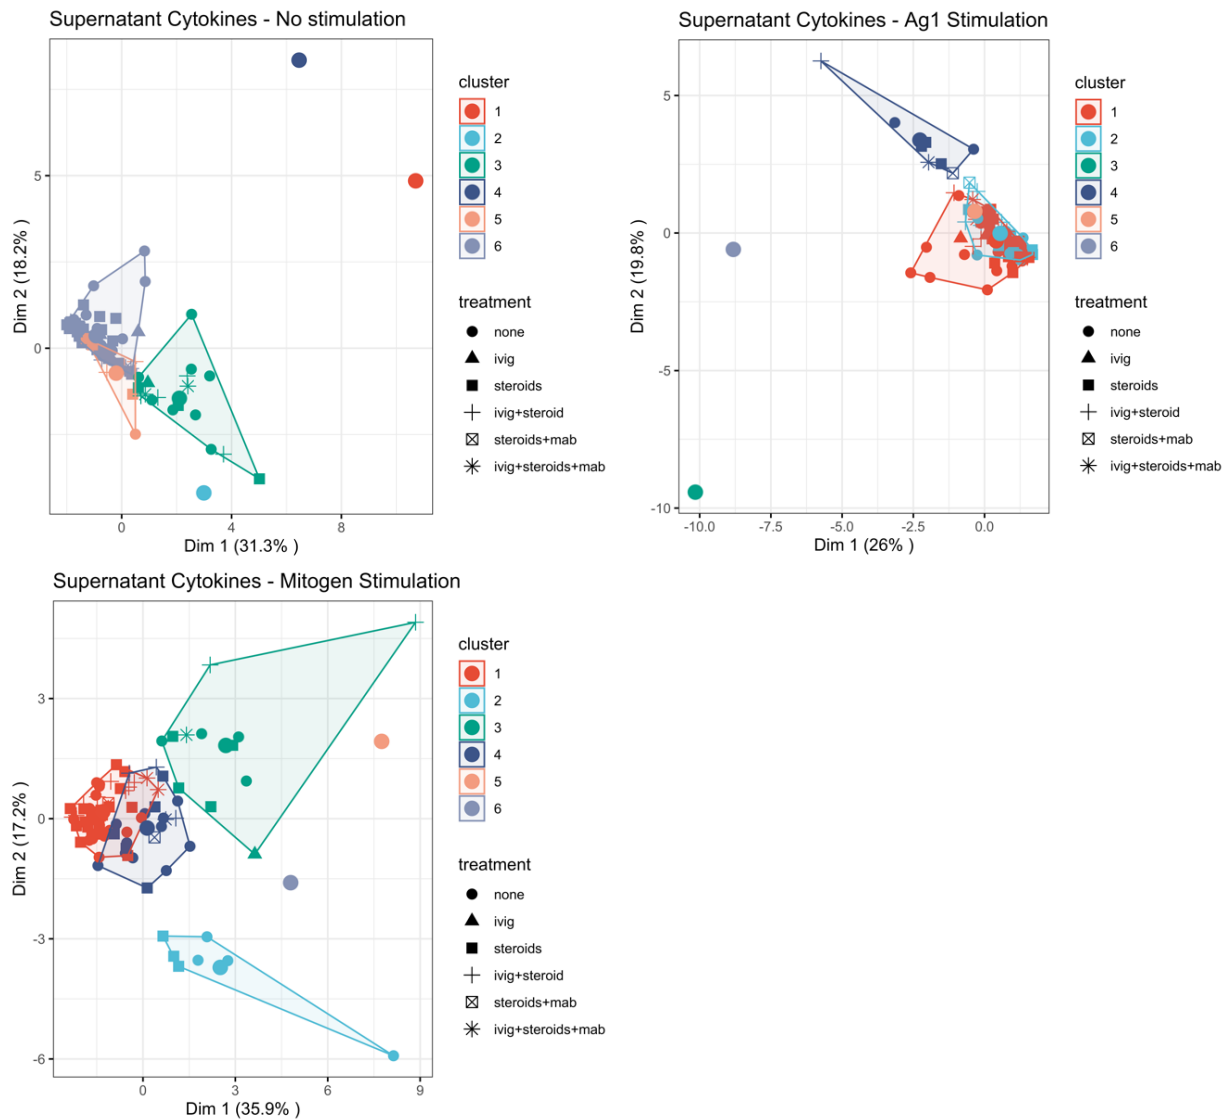

## Supplementary Figure 12. Supernatant cytokine analysis 1: interferons

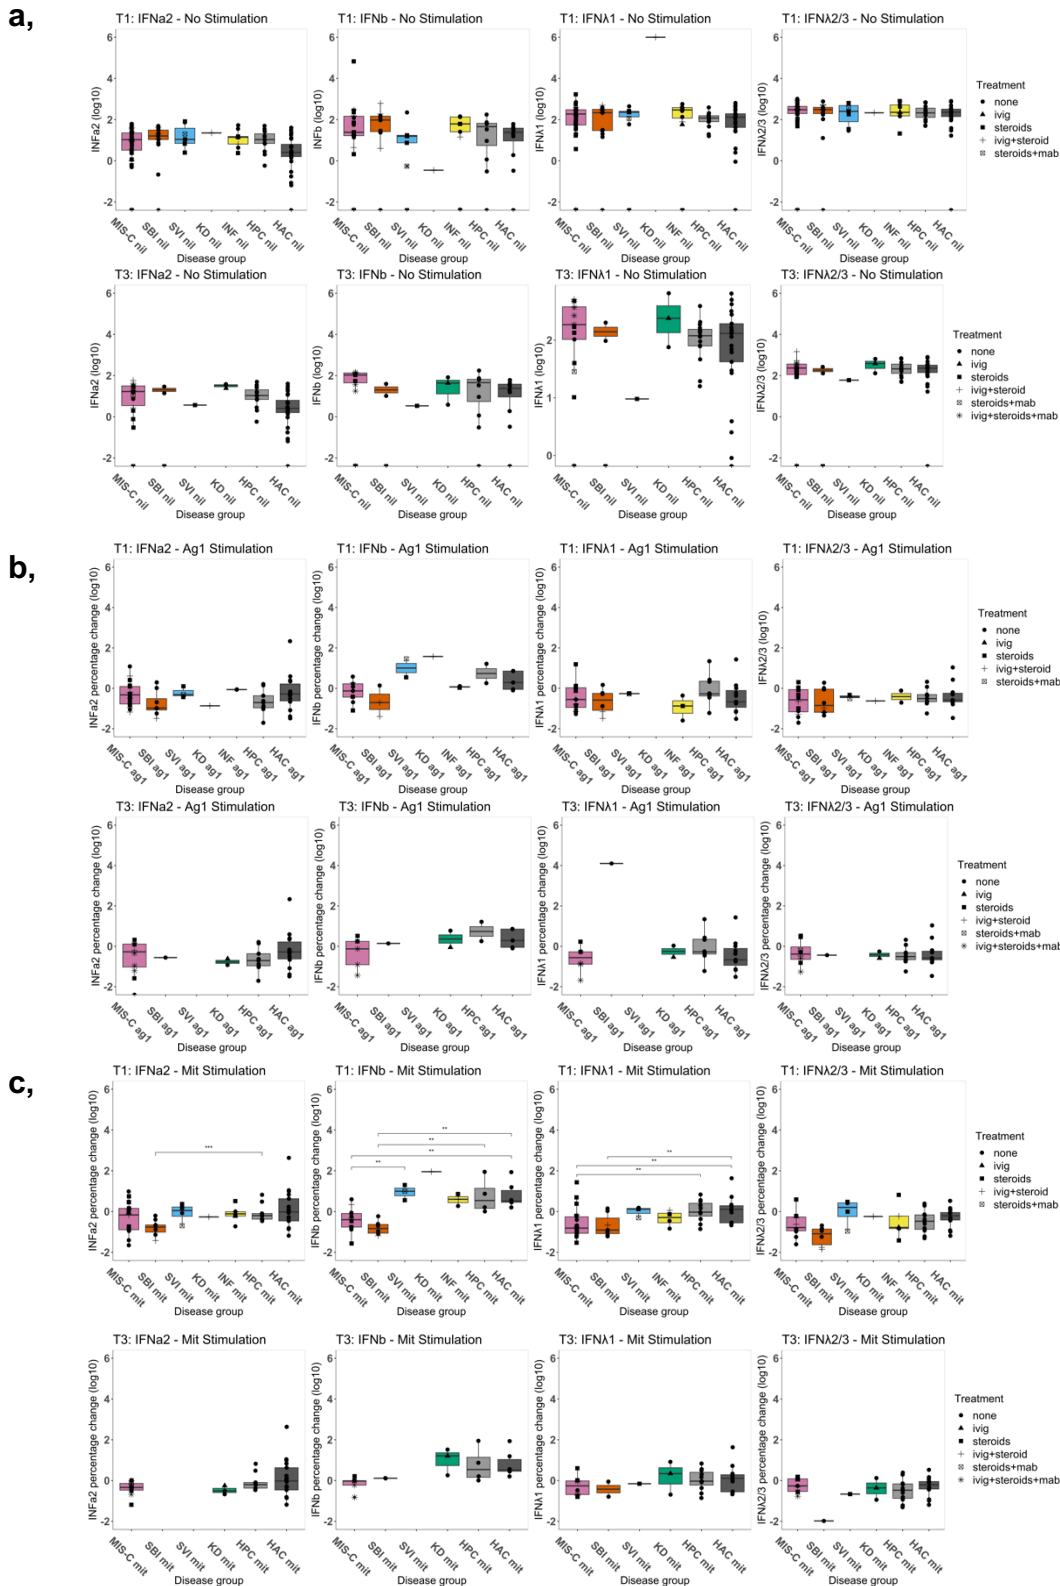

increase from baseline following stimulation with SARS-CoV-2 antigen (ag1) (c) are shown. The shape of each point indicates the treatment received prior to sampling.

## Supplementary Figure 13. Supernatant cytokine analysis 2: remaining cytokines

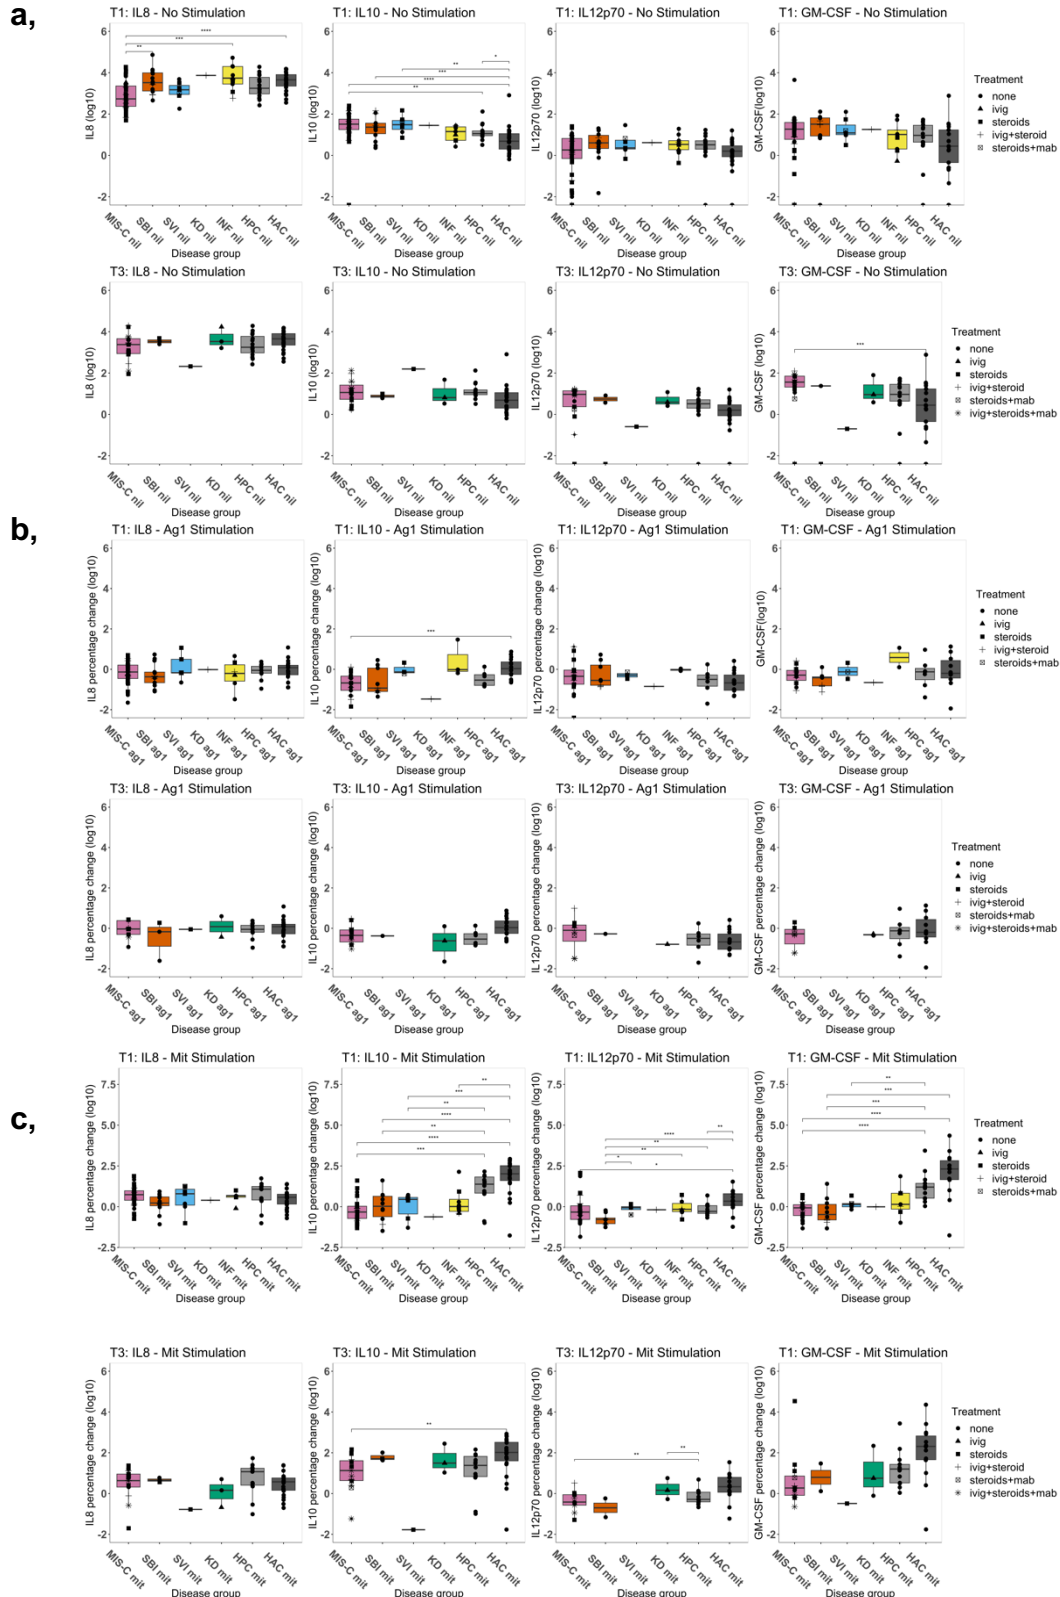



bacterial illness (SBI), severe viral illness (SVI), Kawasaki disease (KD), other inflammatory disease. Absolute cytokine levels from acute (T1) and convalescent (T3) samples at baseline – unstimulated (**a**) percentage increase from baseline following stimulation with mitogen (mit) (**b**), and absolute increase from baseline following stimulation with SARS-CoV-2 antigen (ag1) (**c**) are shown. The shape of each point indicates the treatment received prior to sampling.

**Supplementary Figure 14.** Supernatant cytokine sub-analysis of MIS-C T1 by clusters identified on mass cytometry.

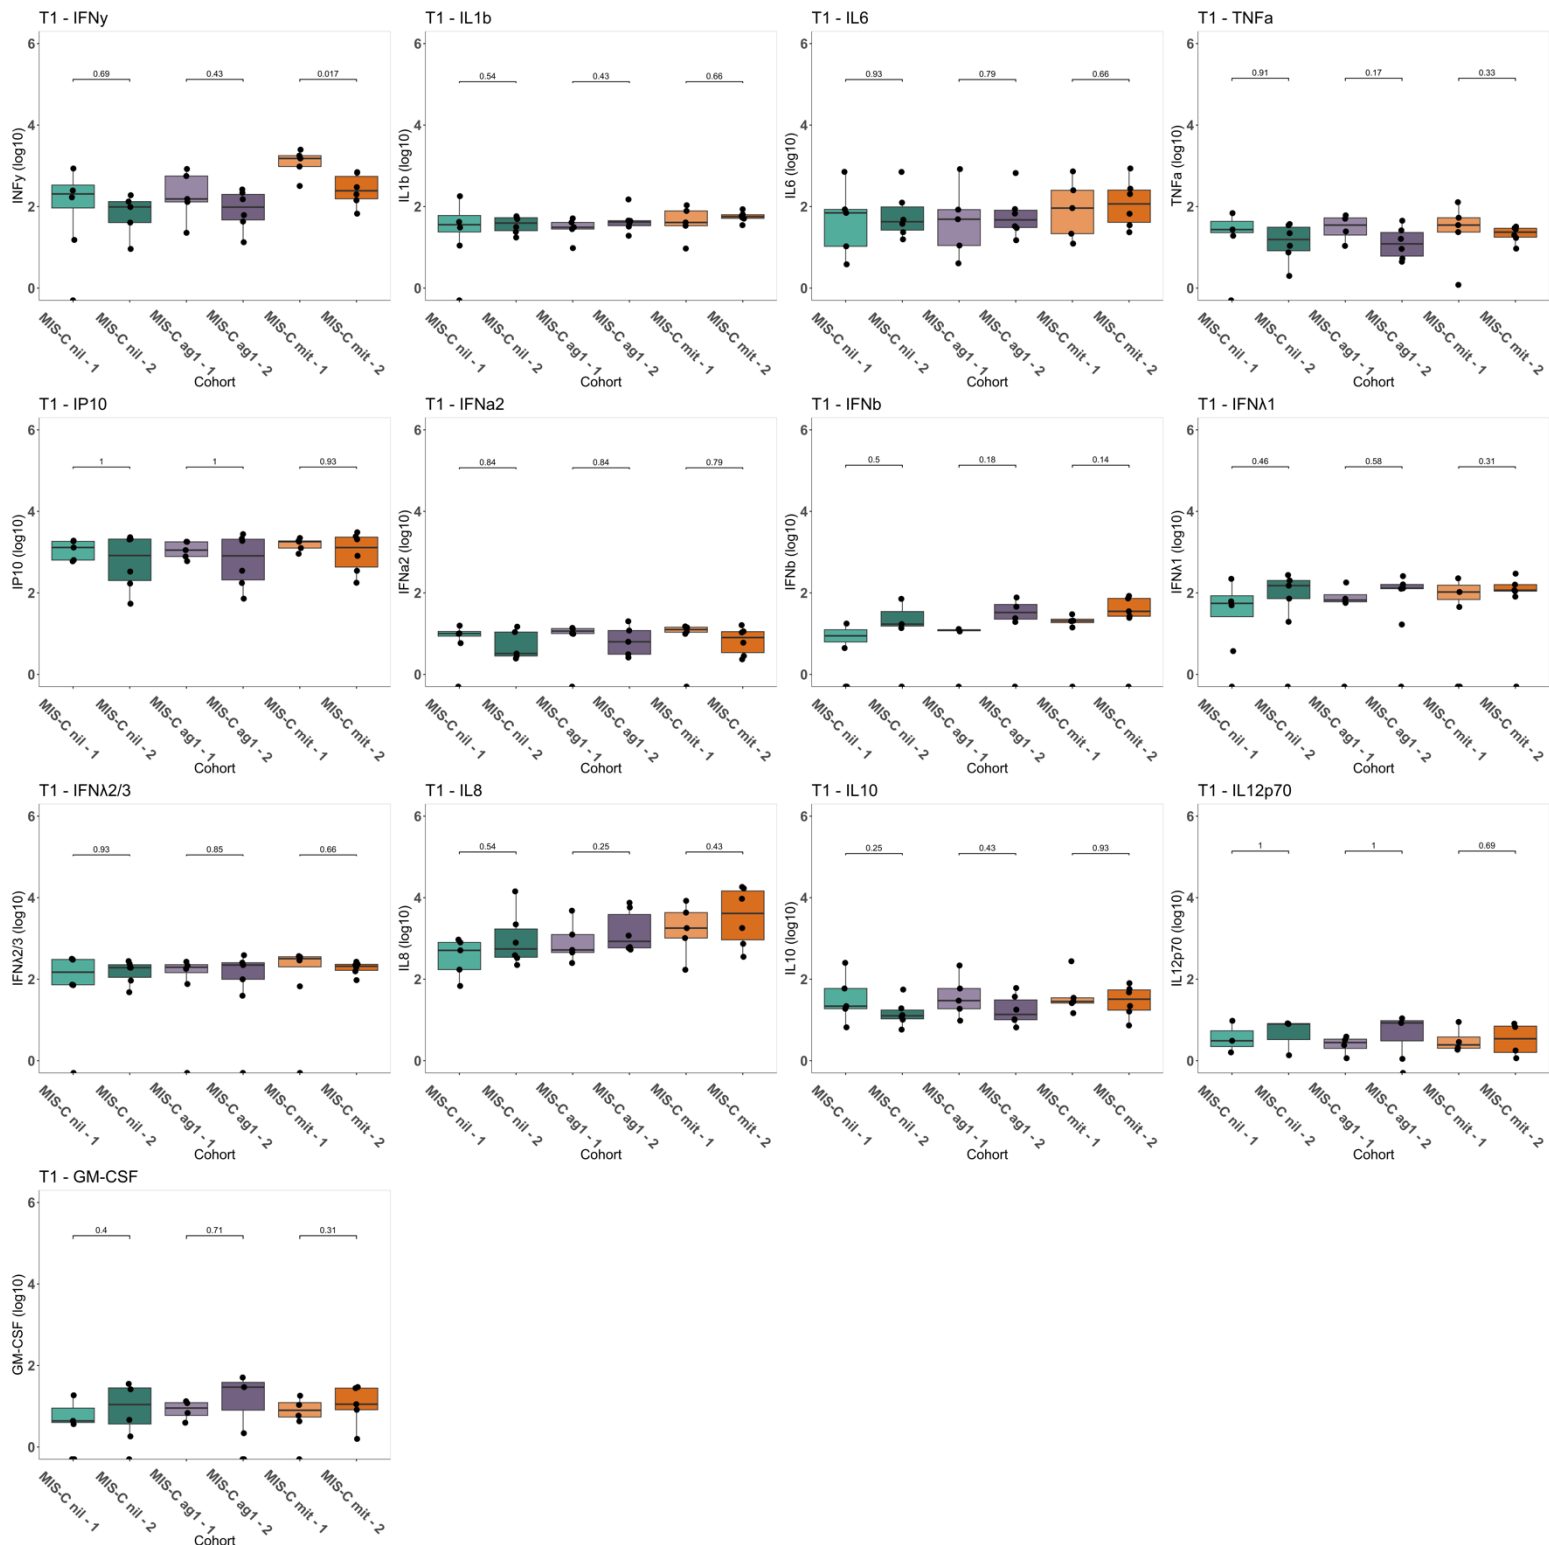

Box plots showing concentration of cell stimulation assay supernatant cytokines levels in acute (T1) MIS-C by clusters 1 and 2 identified on mass cytometry: IFN $\gamma$ , IL1 $\beta$ , IL6, TNF $\alpha$ , IP10, IFN $\alpha$ 2, IFN $\beta$ , IFN $\gamma$ , IFN $\lambda$ 1, IFN $\lambda$ 2/3, IL8, IL10, IL12p70 and GM-CSF.

Log<sub>10</sub> transformed raw data at baseline and following stimulation with SARS-CoV-2 antigen (ag1) and mitogen (mit) are shown. Each point represents a patient sample. P values from Wilcoxon pairwise comparisons are displayed.

**Supplementary Figure 15.** Heatmap summarising mass cytometry results of stimulated samples: foldchange from baseline following stimulation with SARS-CoV-2 antigen and mitogen for variables related to the a) innate immune response and b) T cell immune response.

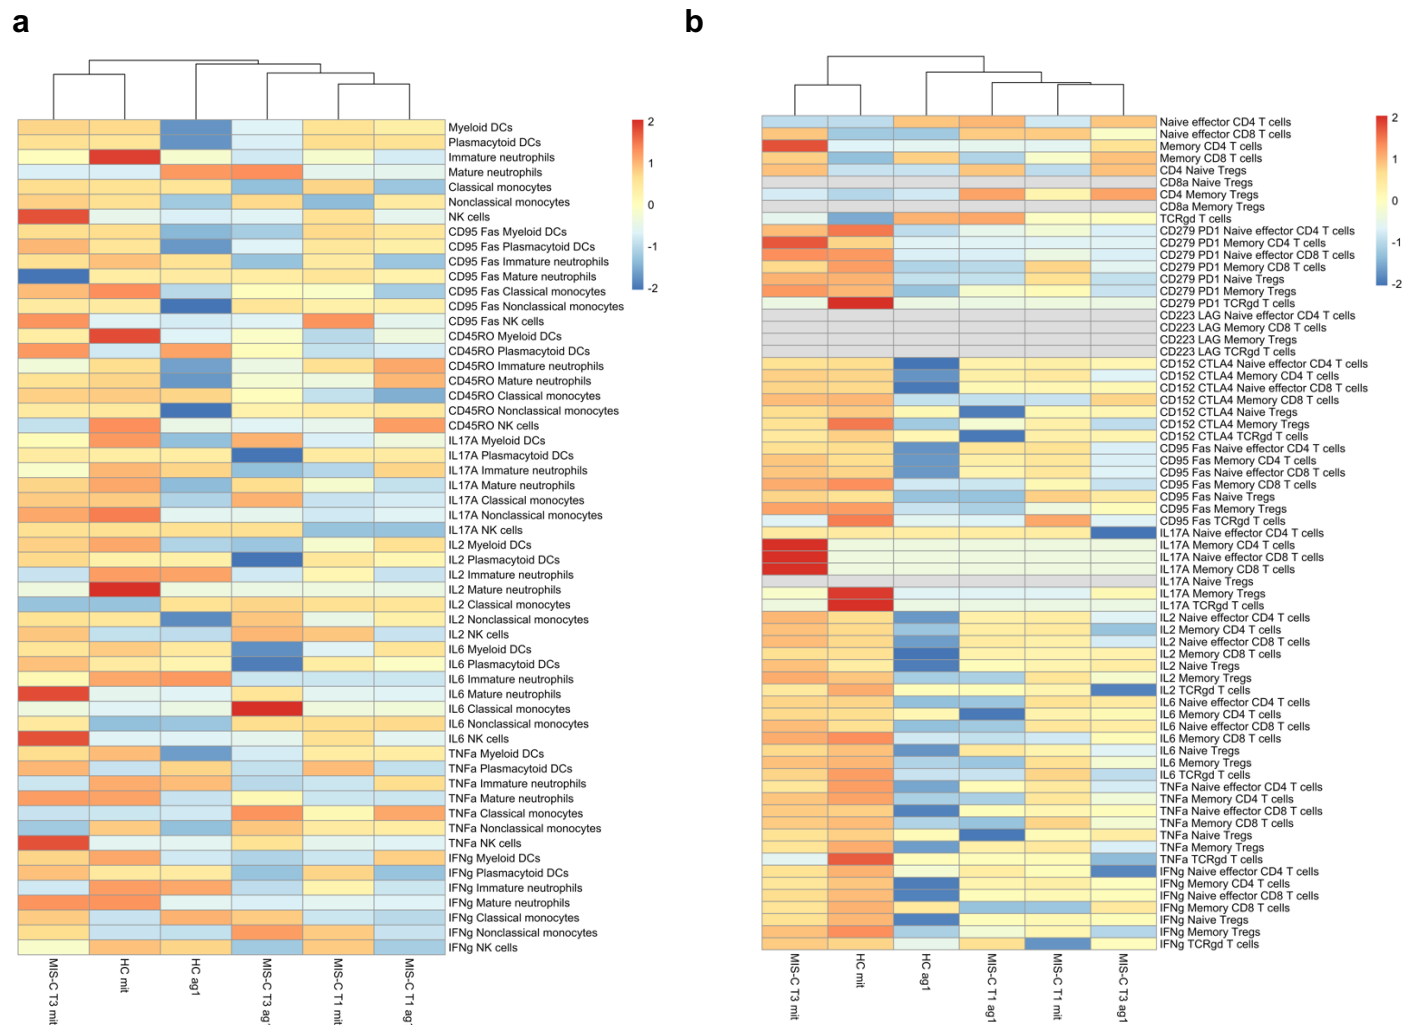

**Supplementary Figure 16.** Gene set enrichment analysis (GSEA) results. **a**, children with MIS-C (TP1) versus pediatric healthy controls; **b**, children with definite bacterial infection (TP1) versus pediatric healthy controls; **c**, children with definite viral infection (TP1) versus pediatric healthy controls; **d**, children with MIS-C versus children with definite bacterial infection. GSEA was undertaken in the R statistical environment, using pathways annotated by the Gene Ontology (GO) database.

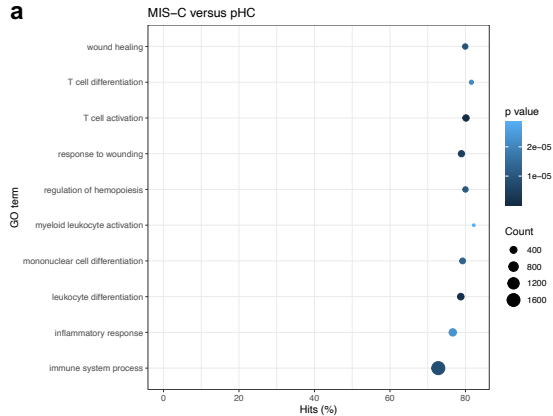

MIS-C versus pediatric healthy controls

| Term                             | DE genes | Genes in category | Percent DE genes (hits) |
|----------------------------------|----------|-------------------|-------------------------|
| Myeloid leukocyte activation     | 157      | 191               | 82.2                    |
| T cell differentiation           | 186      | 228               | 81.6                    |
| T cell activation                | 339      | 423               | 80.1                    |
| Regulation of haemopoiesis       | 256      | 320               | 80.0                    |
| Wound healing                    | 255      | 319               | 79.9                    |
| Mononuclear cell differentiation | 290      | 366               | 79.2                    |
| Response to wounding             | 326      | 413               | 78.9                    |
| Leukocyte differentiation        | 367      | 466               | 78.8                    |
| Inflammatory response            | 456      | 595               | 76.6                    |
| Immune system process            | 1649     | 2265              | 72.8                    |

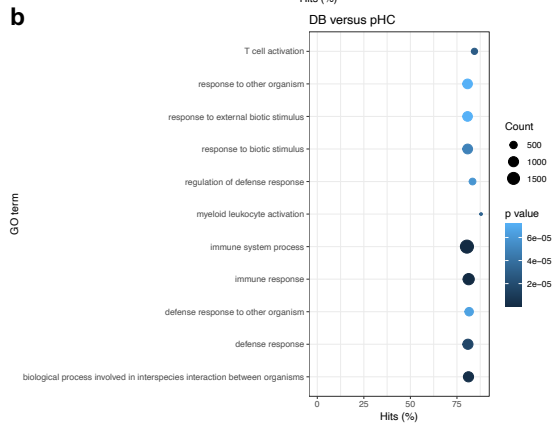

Definite bacterial infection (DB) versus pediatric healthy controls

| Term                                                                      | DE genes | Genes in category | Percent DE genes (hits) |
|---------------------------------------------------------------------------|----------|-------------------|-------------------------|
| Myeloid leukocyte activation                                              | 168      | 191               | 88.0                    |
| T cell activation                                                         | 357      | 423               | 84.4                    |
| Regulation of defense response                                            | 416      | 499               | 83.4                    |
| Defense response to other organism                                        | 680      | 834               | 81.5                    |
| Immune response                                                           | 1290     | 1587              | 81.3                    |
| Biological process involved in interspecies interaction between organisms | 1023     | 1260              | 81.2                    |
| Defense response                                                          | 1024     | 1266              | 80.9                    |
| Response to biotic stimulus                                               | 939      | 1163              | 80.7                    |
| Response to external biotic stimulus                                      | 911      | 1129              | 80.7                    |
| Immune system process                                                     | 1820     | 2265              | 80.4                    |

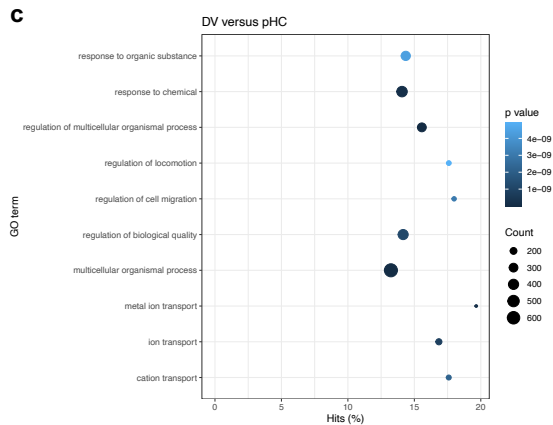

Definite viral infection (DV) versus pediatric healthy controls

| Term                                                                      | DE genes | Genes in category | Percent DE genes (hits) |
|---------------------------------------------------------------------------|----------|-------------------|-------------------------|
| Innate immune response                                                    | 451      | 682               | 66.1                    |
| Response to cytokine                                                      | 472      | 743               | 63.5                    |
| Defense response to other organism                                        | 529      | 834               | 63.4                    |
| Defense response                                                          | 785      | 1266              | 62.0                    |
| Biological process involved in interspecies interaction between organisms | 779      | 1260              | 61.8                    |
| Response to external biotic stimulus                                      | 697      | 1129              | 61.7                    |
| Response to other organism                                                | 697      | 1129              | 61.7                    |
| Response to external stimulus                                             | 1238     | 2049              | 60.4                    |
| Response to organic substance                                             | 1370     | 2306              | 59.4                    |
| Response to stress                                                        | 1793     | 3045              | 58.9                    |

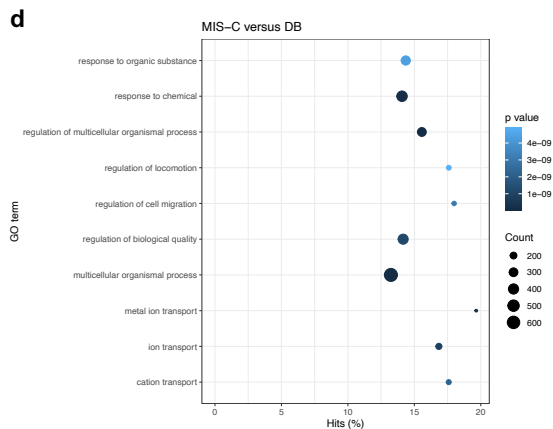

MIS-C versus definite bacterial infection (DB)

| Term                                           | DE genes | Genes in category | Percent DE genes (hits) |
|------------------------------------------------|----------|-------------------|-------------------------|
| Metal ion transport                            | 114      | 580               | 19.7                    |
| Regular of cell migration                      | 129      | 717               | 18.0                    |
| Cation transport                               | 140      | 796               | 17.6                    |
| Regulation of locomotion                       | 136      | 773               | 17.6                    |
| Ion transport                                  | 173      | 1027              | 16.8                    |
| Regulation of multicellular organismal process | 306      | 1966              | 15.6                    |
| Response to organic substance                  | 331      | 2306              | 14.4                    |
| Regulation of biological quality               | 393      | 2776              | 14.2                    |
| Response to chemical                           | 423      | 3006              | 14.1                    |
| Multicellular organismal process               | 660      | 4986              | 13.2                    |

## DIAMONDS Consortium Membership

Supplemental Online Content: Nonauthor Collaborators

\*First name, last name, and suffix (if applicable) are required and will appear in PubMed.

| <b>*Group Name(s): DIAMONDS consortium</b> |                      |                              |                         |                         |                                                 |                                                                |                                                                                                   |
|--------------------------------------------|----------------------|------------------------------|-------------------------|-------------------------|-------------------------------------------------|----------------------------------------------------------------|---------------------------------------------------------------------------------------------------|
| <b>*First Name and Middle Initial(s)</b>   | <b>*Last Name</b>    | <b>*Suffix (eg, Jr, III)</b> | <b>Academic Degrees</b> | <b>Institution</b>      | <b>Location (city, state/province, country)</b> | <b>Role or Contribution, eg, chair, principal investigator</b> | <b>Group (if more than 1 Group listed in the byline) and/or Subgroup (eg, Steering Committee)</b> |
| Aubrey                                     | Cunnington           |                              |                         | Imperial College London |                                                 | Consortium member                                              |                                                                                                   |
| Jethro                                     | Herberg              |                              |                         | Imperial College London |                                                 | Consortium member                                              |                                                                                                   |
| Myrsini                                    | Kaforou              |                              |                         | Imperial College London |                                                 | Consortium member                                              |                                                                                                   |
| Victoria J.                                | Wright               |                              |                         | Imperial College London |                                                 | Consortium member                                              |                                                                                                   |
| Evangelos                                  | Bellos               |                              |                         | Imperial College London |                                                 | Consortium member                                              |                                                                                                   |
| Claire                                     | Broderick            |                              |                         | Imperial College London |                                                 | Consortium member                                              |                                                                                                   |
| Samuel                                     | Channon-Wells        |                              |                         | Imperial College London |                                                 | Consortium member                                              |                                                                                                   |
| Samantha                                   | Cooray               |                              |                         | Imperial College London |                                                 | Consortium member                                              |                                                                                                   |
| Tisham                                     | De                   |                              |                         | Imperial College London |                                                 | Consortium member                                              |                                                                                                   |
| Giselle                                    | D'Souza              |                              |                         | Imperial College London |                                                 | Consortium member                                              |                                                                                                   |
| Leire                                      | Estramiana Elorrieta |                              |                         | Imperial College London |                                                 | Consortium member                                              |                                                                                                   |

|           |                     |  |  |                         |  |                   |  |
|-----------|---------------------|--|--|-------------------------|--|-------------------|--|
| Diego     | Estrada-Rivadeneira |  |  | Imperial College London |  | Consortium member |  |
| Rachel    | Galassini           |  |  | Imperial College London |  | Consortium member |  |
| Dominic   | Habgood-Coote       |  |  | Imperial College London |  | Consortium member |  |
| Shea      | Hamilton            |  |  | Imperial College London |  | Consortium member |  |
| Heather   | Jackson             |  |  | Imperial College London |  | Consortium member |  |
| James     | Kavanagh            |  |  | Imperial College London |  | Consortium member |  |
| Ilana     | Keren               |  |  | Imperial College London |  | Consortium member |  |
| Mahdi     | Moradi Marjaneh     |  |  | Imperial College London |  | Consortium member |  |
| Stephanie | Menikou             |  |  | Imperial College London |  | Consortium member |  |
| Samuel    | Nichols             |  |  | Imperial College London |  | Consortium member |  |
| Ruud      | Nijman              |  |  | Imperial College London |  | Consortium member |  |
| Ivana     | Pennisi             |  |  | Imperial College London |  | Consortium member |  |
| Oliver    | Powell              |  |  | Imperial College London |  | Consortium member |  |
| Ruth      | Reid                |  |  | Imperial College London |  | Consortium member |  |
| Priyen    | Shah                |  |  | Imperial College London |  | Consortium member |  |
| Ortensia  | Vito                |  |  | Imperial College London |  | Consortium member |  |



|           |           |  |  |                                       |  |                   |  |
|-----------|-----------|--|--|---------------------------------------|--|-------------------|--|
| Elizabeth | Whittaker |  |  | Imperial College London               |  | Consortium member |  |
| Clare     | Wilson    |  |  | Imperial College London               |  | Consortium member |  |
| Rebecca   | Womersley |  |  | Imperial College London               |  | Consortium member |  |
| Amina     | Abdulla   |  |  | Imperial College Healthcare NHS Trust |  | Consortium member |  |
| Sarah     | Darnell   |  |  | Imperial College Healthcare NHS Trust |  | Consortium member |  |

v 02-22 1 of 22

#### Supplemental Online Content: Nonauthor Collaborators

\*First name, last name, and suffix (if applicable) are required and will appear in PubMed.

| <b>*First Name and Middle Initial(s)</b> | <b>*Last Name</b> | <b>*Suffix (eg, Jr, III)</b> | <b>Academic Degrees</b> | <b>Institution</b>                                           | <b>Location (city, state/province, country)</b> | <b>Role or Contribution, eg, chair, principal investigator</b> | <b>Group (if more than 1 Group listed in the byline) and/or Subgroup (eg, Steering Committee)</b> |
|------------------------------------------|-------------------|------------------------------|-------------------------|--------------------------------------------------------------|-------------------------------------------------|----------------------------------------------------------------|---------------------------------------------------------------------------------------------------|
| Sobia                                    | Mustafa           |                              |                         | Imperial College Healthcare NHS Trust                        |                                                 | Consortium member                                              |                                                                                                   |
| Pantelis                                 | Georgiou          |                              |                         | Imperial College London                                      |                                                 | Consortium member                                              |                                                                                                   |
| Jesus-Rodriguez                          | Manzano           |                              |                         | Imperial College London                                      |                                                 | Consortium member                                              |                                                                                                   |
| Nicolas                                  | Moser             |                              |                         | Imperial College London                                      |                                                 | Consortium member                                              |                                                                                                   |
| Michael                                  | Carter            |                              |                         | Evelina London Children's Hospital, Guy's and St Thomas' NHS |                                                 | Consortium member                                              |                                                                                                   |

|           |         |  |  |                                                                                                      |  |                   |  |
|-----------|---------|--|--|------------------------------------------------------------------------------------------------------|--|-------------------|--|
|           |         |  |  | Foundation Trust; King's College London                                                              |  |                   |  |
| Shane     | Tibby   |  |  | Evelina London Children's Hospital, Guy's and St Thomas' NHS Foundation Trust; King's College London |  | Consortium member |  |
| Jonathan  | Cohen   |  |  | Evelina London Children's Hospital, Guy's and St Thomas' NHS Foundation Trust; King's College London |  | Consortium member |  |
| Francesca | Davis   |  |  | Evelina London Children's Hospital, Guy's and St Thomas' NHS Foundation Trust; King's College London |  | Consortium member |  |
| Julia     | Kenny   |  |  | Evelina London Children's Hospital, Guy's and St Thomas' NHS Foundation Trust; King's College London |  | Consortium member |  |
| Paul      | Wellman |  |  | Evelina London Children's Hospital, Guy's and St Thomas' NHS Foundation                              |  | Consortium member |  |

|       |       |  |  |                                                                                                      |  |                   |  |
|-------|-------|--|--|------------------------------------------------------------------------------------------------------|--|-------------------|--|
|       |       |  |  | Trust; King's College London                                                                         |  |                   |  |
| Marie | White |  |  | Evelina London Children's Hospital, Guy's and St Thomas' NHS Foundation Trust; King's College London |  | Consortium member |  |

v 02-22 2 of 22

# Supplemental Online Content: Nonauthor Collaborators

\*First name, last name, and suffix (if applicable) are required and will appear in PubMed.

| <b>*First Name and Middle Initial(s)</b> | <b>*Last Name</b> | <b>*Suffix (eg, Jr, III)</b> | <b>Academic Degrees</b> | <b>Institution</b>                                                                                   | <b>Location (city, state/province, country)</b> | <b>Role or Contribution, eg, chair, principal investigator</b> | <b>Group (if more than 1 Group listed in the byline) and/or Subgroup (eg, Steering Committee)</b> |
|------------------------------------------|-------------------|------------------------------|-------------------------|------------------------------------------------------------------------------------------------------|-------------------------------------------------|----------------------------------------------------------------|---------------------------------------------------------------------------------------------------|
| Matthew                                  | Fish              |                              |                         | Evelina London Children's Hospital, Guy's and St Thomas' NHS Foundation Trust; King's College London |                                                 | Consortium member                                              |                                                                                                   |
| Aislinn                                  | Jennings          |                              |                         | Evelina London Children's Hospital, Guy's and St Thomas' NHS Foundation Trust; King's College London |                                                 | Consortium member                                              |                                                                                                   |
| Manu                                     | Shankar-Hari      |                              |                         | Evelina London Children's                                                                            |                                                 | Consortium member                                              |                                                                                                   |

|         |          |  |  |                                                                            |  |                   |  |
|---------|----------|--|--|----------------------------------------------------------------------------|--|-------------------|--|
|         |          |  |  | Hospital, Guy's and St Thomas' NHS Foundation Trust; King's College London |  |                   |  |
| Katy    | Fidler   |  |  | University Hospitals Sussex                                                |  | Consortium member |  |
| Dan     | Agranoff |  |  | University Hospitals Sussex                                                |  | Consortium member |  |
| Vivien  | Richmond |  |  | University Hospitals Sussex                                                |  | Consortium member |  |
| Mathhew | Seal     |  |  | University Hospitals Sussex                                                |  | Consortium member |  |
| Saul    | Faust    |  |  | University Hospital Southampton NHS                                        |  | Consortium member |  |
| Dan     | Owen     |  |  | University Hospital Southampton NHS Foundation Trust                       |  | Consortium member |  |
| Ruth    | Ensom    |  |  | University Hospital Southampton NHS Foundation Trust                       |  | Consortium member |  |
| Sarah   | McKay    |  |  | University Hospital Southampton NHS Foundation Trust                       |  | Consortium member |  |
| Mariya  | Shaji    |  |  | University Hospital Southampton NHS Foundation Trust                       |  | Consortium member |  |
| Rachel  | Schranz  |  |  | University Hospital Southampton                                            |  | Consortium member |  |

|               |              |  |  |                        |  |                   |  |
|---------------|--------------|--|--|------------------------|--|-------------------|--|
|               |              |  |  | NHS Foundation Trust   |  |                   |  |
| Prita         | Rughnani     |  |  | Barts Health NHS Trust |  | Consortium member |  |
| Amutha        | Anpananthar  |  |  | Barts Health NHS Trust |  | Consortium member |  |
| Susan         | Liebeschuetz |  |  | Barts Health NHS Trust |  | Consortium member |  |
| Anna          | Riddell      |  |  | Barts Health NHS Trust |  | Consortium member |  |
| Divya         | Divakaran    |  |  | Barts Health NHS Trust |  | Consortium member |  |
| Louise        | Han          |  |  | Barts Health NHS Trust |  | Consortium member |  |
| Nosheen       | Khalid       |  |  | Barts Health NHS Trust |  | Consortium member |  |
| Ivone Lancoma | Malcolm      |  |  | Barts Health NHS Trust |  | Consortium member |  |

v 02-22 3 of 22

#### Supplemental Online Content: Nonauthor Collaborators

\*First name, last name, and suffix (if applicable) are required and will appear in PubMed.

| <b>*First Name and Middle Initial(s)</b> | <b>*Last Name</b> | <b>*Suffix (eg, Jr, III)</b> | <b>Academic Degrees</b> | <b>Institution</b>                                             | <b>Location (city, state/province, country)</b> | <b>Role or Contribution, eg, chair, principal investigator</b> | <b>Group (if more than 1 Group listed in the byline) and/or Subgroup (eg, Steering Committee)</b> |
|------------------------------------------|-------------------|------------------------------|-------------------------|----------------------------------------------------------------|-------------------------------------------------|----------------------------------------------------------------|---------------------------------------------------------------------------------------------------|
| Jessica                                  | Schofield         |                              |                         | Barts Health NHS Trust                                         |                                                 | Consortium member                                              |                                                                                                   |
| Teresa                                   | Simagan           |                              |                         | Barts Health NHS Trust                                         |                                                 | Consortium member                                              |                                                                                                   |
| Mark                                     | Peters            |                              |                         | Great Ormond Street Hospital for Children NHS Foundation Trust |                                                 | Consortium member                                              |                                                                                                   |
| Alasdair                                 | Bamford           |                              |                         | Great Ormond Street Hospital for Children NHS                  |                                                 | Consortium member                                              |                                                                                                   |

|         |           |  |  |                                                                |  |                   |  |
|---------|-----------|--|--|----------------------------------------------------------------|--|-------------------|--|
|         |           |  |  | Foundation Trust                                               |  |                   |  |
| Lauran  | O'Neill   |  |  | Great Ormond Street Hospital for Children NHS Foundation Trust |  | Consortium member |  |
| Nazima  | Pathan    |  |  | Cambridge University Hospitals NHS Foundation Trust            |  | Consortium member |  |
| Esther  | Daubney   |  |  | Cambridge University Hospitals NHS Foundation Trust            |  | Consortium member |  |
| Deborah | White     |  |  | Cambridge University Hospitals NHS Foundation Trust            |  | Consortium member |  |
| Melissa | Heightman |  |  | University College London Hospitals NHS Foundation Trust       |  | Consortium member |  |
| Sarah   | Eisen     |  |  | University College London Hospitals NHS Foundation Trust       |  | Consortium member |  |
| Terry   | Segal     |  |  | University College London Hospitals NHS Foundation Trust       |  | Consortium member |  |
| Lucy    | Wellings  |  |  | University College                                             |  | Consortium member |  |

|         |            |  |  |                                                                                                |  |                   |  |
|---------|------------|--|--|------------------------------------------------------------------------------------------------|--|-------------------|--|
| Simon   | B Drysdale |  |  | London Hospitals NHS Foundation Trust<br>St George's University Hospitals NHS Foundation Trust |  | Consortium member |  |
| Nicole  | Branch     |  |  | St George's University Hospitals NHS Foundation Trust                                          |  | Consortium member |  |
| Lisa    | Hamzah     |  |  | St George's University Hospitals NHS Foundation Trust                                          |  | Consortium member |  |
| Heather | Jarman     |  |  | St George's University Hospitals NHS Foundation Trust                                          |  | Consortium member |  |
| Maggie  | Nyirenda   |  |  | Lewisham and Greenwich NHS Trust                                                               |  | Consortium member |  |
| Lisa    | Capozzi    |  |  | Lewisham and Greenwich NHS Trust                                                               |  | Consortium member |  |
| Emma    | Gardiner   |  |  | Lewisham and Greenwich NHS Trust                                                               |  | Consortium member |  |
| Robert  | Moots      |  |  | Liverpool University Hospitals NHS Foundation Trust                                            |  | Consortium member |  |

Supplemental Online Content: Nonauthor Collaborators

\*First name, last name, and suffix (if applicable) are required and will appear in PubMed.

| <b>*First Name and Middle Initial(s)</b> | <b>*Last Name</b> | <b>*Suffix (eg, Jr, III)</b> | <b>Academic Degrees</b> | <b>Institution</b>                                  | <b>Location (city, state/province, country)</b> | <b>Role or Contribution, eg, chair, principal investigator</b> | <b>Group (if more than 1 Group listed in the byline) and/or Subgroup (eg, Steering Committee)</b> |
|------------------------------------------|-------------------|------------------------------|-------------------------|-----------------------------------------------------|-------------------------------------------------|----------------------------------------------------------------|---------------------------------------------------------------------------------------------------|
| Magda                                    | Nasher            |                              |                         | Liverpool University Hospitals NHS Foundation Trust |                                                 | Consortium member                                              |                                                                                                   |
| Anita                                    | Hanson            |                              |                         | Liverpool University Hospitals NHS Foundation Trust |                                                 | Consortium member                                              |                                                                                                   |
| Michelle                                 | Linforth          |                              |                         | Liverpool University Hospitals NHS Foundation Trust |                                                 | Consortium member                                              |                                                                                                   |
| Sean                                     | O’Riordan         |                              |                         | Leeds Teaching Hospitals NHS Trust                  |                                                 | Consortium member                                              |                                                                                                   |
| Donna                                    | Ellis             |                              |                         | Leeds Teaching Hospitals NHS Trust                  |                                                 | Consortium member                                              |                                                                                                   |
| Akash                                    | Deep              |                              |                         | King’s College Hospital NHS Foundation Trust        |                                                 | Consortium member                                              |                                                                                                   |
| Ivan                                     | Caro              |                              |                         | King’s College Hospital NHS Foundation Trust        |                                                 | Consortium member                                              |                                                                                                   |
| Fiona                                    | Shackley          |                              |                         | Sheffield Children’s NHS Foundation Trust           |                                                 | Consortium member                                              |                                                                                                   |
| Arianna                                  | Bellini           |                              |                         | Sheffield Children’s NHS                            |                                                 | Consortium member                                              |                                                                                                   |



|            |             |  |  |                                                                           |  |                   |  |
|------------|-------------|--|--|---------------------------------------------------------------------------|--|-------------------|--|
|            |             |  |  | Foundation Trust                                                          |  |                   |  |
| Stuart     | Gormley     |  |  | Sheffield Children's NHS Foundation Trust                                 |  | Consortium member |  |
| Samira     | Neshat      |  |  | University Hospitals of Leicester NHS Foundation Trust                    |  | Consortium member |  |
| Barnaby    | Scholefield |  |  | Birmingham Women's and Children's Hospital NHS Foundation Trust           |  | Consortium member |  |
| Ceri       | Robbins     |  |  | Birmingham Women's and Children's Hospital NHS Foundation Trust           |  | Consortium member |  |
| Helen      | Winmill     |  |  | Birmingham Women's and Children's Hospital NHS Foundation Trust           |  | Consortium member |  |
| Stéphane C | Paulus      |  |  | University of Oxford Partner Children's Hospital, John Radcliffe Hospital |  | Consortium member |  |
| Andrew J   | Pollard     |  |  | University of Oxford Partner Children's                                   |  | Consortium member |  |
| Mark       | Anthony     |  |  | University of Oxford Partner Children's Hospital, John Radcliffe Hospital |  | Consortium member |  |
| Sarah      | Hopton      |  |  | University of Oxford                                                      |  | Consortium member |  |

|  |  |  |  |                                                                  |  |  |  |
|--|--|--|--|------------------------------------------------------------------|--|--|--|
|  |  |  |  | Partner<br>Children's<br>Hospital, John<br>Radcliffe<br>Hospital |  |  |  |
|--|--|--|--|------------------------------------------------------------------|--|--|--|

v 02-22 5 of 22

Supplemental Online Content: Nonauthor Collaborators

\*First name, last name, and suffix (if applicable) are required and will appear in PubMed.

| <b>*First<br/>Name<br/>and<br/>Middle<br/>Initial(s)</b> | <b>*Last<br/>Name</b> | <b>*Suffix<br/>(eg, Jr,<br/>III)</b> | <b>Academic<br/>Degrees</b> | <b>Institution</b>                                                                          | <b>Location (city,<br/>state/province,<br/>country)</b> | <b>Role or<br/>Contribution,<br/>eg, chair,<br/>principal<br/>investigator</b> | <b>Group (if<br/>more than 1<br/>Group listed<br/>in the byline)<br/>and/or<br/>Subgroup (eg,<br/>Steering<br/>Committee)</b> |
|----------------------------------------------------------|-----------------------|--------------------------------------|-----------------------------|---------------------------------------------------------------------------------------------|---------------------------------------------------------|--------------------------------------------------------------------------------|-------------------------------------------------------------------------------------------------------------------------------|
| Danielle                                                 | Miller                |                                      |                             | University of<br>Oxford<br>Partner<br>Children's<br>Hospital, John<br>Radcliffe<br>Hospital |                                                         | Consortium<br>member                                                           |                                                                                                                               |
| Zoe                                                      | Oliver                |                                      |                             | University of<br>Oxford<br>Partner<br>Children's<br>Hospital, John<br>Radcliffe<br>Hospital |                                                         | Consortium<br>member                                                           |                                                                                                                               |
| Sally                                                    | Beer                  |                                      |                             | University of<br>Oxford<br>Partner<br>Children's<br>Hospital, John<br>Radcliffe<br>Hospital |                                                         | Consortium<br>member                                                           |                                                                                                                               |
| Bryony                                                   | Ward                  |                                      |                             | University of<br>Oxford<br>Partner<br>Children's<br>Hospital, John<br>Radcliffe<br>Hospital |                                                         | Consortium<br>member                                                           |                                                                                                                               |
| Shrijana                                                 | Shrestha              |                                      |                             | University of<br>Oxford, Nepal<br>Site                                                      |                                                         | Consortium<br>member                                                           |                                                                                                                               |

|                  |                 |  |  |                                                                    |  |                   |  |
|------------------|-----------------|--|--|--------------------------------------------------------------------|--|-------------------|--|
| Meeru            | Gurung          |  |  | University of Oxford, Nepal Site                                   |  | Consortium member |  |
| Puja             | Amatya          |  |  | University of Oxford, Nepal Site                                   |  | Consortium member |  |
| Bhishma          | Pokhrel         |  |  | University of Oxford, Nepal Site                                   |  | Consortium member |  |
| Sanjeev Man      | Bijukchhe       |  |  | University of Oxford, Nepal Site                                   |  | Consortium member |  |
| Madhav Chandra   | Gautam          |  |  | University of Oxford, Nepal Site                                   |  | Consortium member |  |
| Sarah            | Kelly           |  |  | University of Oxford, Nepal Site                                   |  | Consortium member |  |
| Peter            | O'Reilly        |  |  | University of Oxford, Nepal Site                                   |  | Consortium member |  |
| Sonu             | Shrestha        |  |  | University of Oxford, Nepal Site                                   |  | Consortium member |  |
| Federico         | Martinón-Torres |  |  | Hospital Clínico Universitario de Santiago, Santiago de Compostela |  | Consortium member |  |
| Antonio          | Salas           |  |  | Hospital Clínico Universitario de Santiago, Santiago de Compostela |  | Consortium member |  |
| Fernando Álvarez | González        |  |  | Hospital Clínico Universitario de Santiago, Santiago de Compostela |  | Consortium member |  |
| Sonia Ares       | Gómez           |  |  | Hospital Clínico Universitario de Santiago, Santiago de Compostela |  | Consortium member |  |
| Xabier           | Bello           |  |  | Hospital Clínico                                                   |  | Consortium member |  |

|                  |        |  |  |                                                                    |  |                   |  |
|------------------|--------|--|--|--------------------------------------------------------------------|--|-------------------|--|
|                  |        |  |  | Universitario de Santiago, Santiago de Compostela                  |  |                   |  |
| Mirian Ben       | García |  |  | Hospital Clínico Universitario de Santiago, Santiago de Compostela |  | Consortium member |  |
| Fernando Caamaño | Viña   |  |  | Hospital Clínico Universitario de Santiago, Santiago de Compostela |  | Consortium member |  |

v 02-22 6 of 22

#### Supplemental Online Content: Nonauthor Collaborators

\*First name, last name, and suffix (if applicable) are required and will appear in PubMed.

| <b>*First Name and Middle Initial(s)</b> | <b>*Last Name</b> | <b>*Suffix (eg, Jr, III)</b> | <b>Academic Degrees</b> | <b>Institution</b>                                                 | <b>Location (city, state/province, country)</b> | <b>Role or Contribution, eg, chair, principal investigator</b> | <b>Group (if more than 1 Group listed in the byline) and/or Subgroup (eg, Steering Committee)</b> |
|------------------------------------------|-------------------|------------------------------|-------------------------|--------------------------------------------------------------------|-------------------------------------------------|----------------------------------------------------------------|---------------------------------------------------------------------------------------------------|
| Sandra                                   | Carnota           |                              |                         | Hospital Clínico Universitario de Santiago, Santiago de Compostela |                                                 | Consortium member                                              |                                                                                                   |
| María José                               | Curras-Tuala      |                              |                         | Hospital Clínico Universitario de Santiago, Santiago de Compostela |                                                 | Consortium member                                              |                                                                                                   |
| Ana Dacosta                              | Urbietta          |                              |                         | Hospital Clínico Universitario de Santiago, Santiago de Compostela |                                                 | Consortium member                                              |                                                                                                   |
| Carlos Durán                             | Suárez            |                              |                         | Hospital Clínico                                                   |                                                 | Consortium member                                              |                                                                                                   |

|                  |                 |  |  |                                                                    |  |                   |  |
|------------------|-----------------|--|--|--------------------------------------------------------------------|--|-------------------|--|
|                  |                 |  |  | Universitario de Santiago, Santiago de Compostela                  |  |                   |  |
| Isabel Ferreiros | Vidal           |  |  | Hospital Clínico Universitario de Santiago, Santiago de Compostela |  | Consortium member |  |
| Luisa García     | Vicente         |  |  | Hospital Clínico Universitario de Santiago, Santiago de Compostela |  | Consortium member |  |
| Alberto          | Gómez-Carballa  |  |  | Hospital Clínico Universitario de Santiago, Santiago de Compostela |  | Consortium member |  |
| Jose Gómez       | Rial            |  |  | Hospital Clínico Universitario de Santiago, Santiago de Compostela |  | Consortium member |  |
| Pilar Leboráns   | Iglesias        |  |  | Hospital Clínico Universitario de Santiago, Santiago de Compostela |  | Consortium member |  |
| Narmeen          | Mallah          |  |  | Hospital Clínico Universitario de Santiago, Santiago de Compostela |  | Consortium member |  |
| Nazareth         | Martinón-Torres |  |  | Hospital Clínico Universitario de Santiago, Santiago de Compostela |  | Consortium member |  |
| José María       | Martinón        |  |  | Hospital Clínico Universitario de Santiago,                        |  | Consortium member |  |

|                      |                    |  |  |                                                                    |  |                   |  |
|----------------------|--------------------|--|--|--------------------------------------------------------------------|--|-------------------|--|
|                      |                    |  |  | Santiago de Compostela                                             |  |                   |  |
| Belén Mosquera Pérez | Sánchez            |  |  | Hospital Clínico Universitario de Santiago, Santiago de Compostela |  | Consortium member |  |
| Jacobo               | Pardo-Seco         |  |  | Hospital Clínico Universitario de Santiago, Santiago de Compostela |  | Consortium member |  |
| Sara                 | Pischedda          |  |  | Hospital Clínico Universitario de Santiago, Santiago de Compostela |  | Consortium member |  |
| Sara Rey             | Vázquez            |  |  | Hospital Clínico Universitario de Santiago, Santiago de Compostela |  | Consortium member |  |
| Irene Rivero         | Calle              |  |  | Hospital Clínico Universitario de Santiago, Santiago de Compostela |  | Consortium member |  |
| Carmen               | Rodríguez-Tenreiro |  |  | Hospital Clínico Universitario de Santiago, Santiago de Compostela |  | Consortium member |  |

v 02-22 7 of 22

#### Supplemental Online Content: Nonauthor Collaborators

\*First name, last name, and suffix (if applicable) are required and will appear in PubMed.

| <b>*First Name and Middle Initial(s)</b> | <b>*Last Name</b> | <b>*Suffix (eg, Jr, III)</b> | <b>Academic Degrees</b> | <b>Institution</b> | <b>Location (city, state/province, country)</b> | <b>Role or Contribution, eg, chair, principal investigator</b> | <b>Group (if more than 1 Group listed in the byline) and/or Subgroup (eg,</b> |
|------------------------------------------|-------------------|------------------------------|-------------------------|--------------------|-------------------------------------------------|----------------------------------------------------------------|-------------------------------------------------------------------------------|
|------------------------------------------|-------------------|------------------------------|-------------------------|--------------------|-------------------------------------------------|----------------------------------------------------------------|-------------------------------------------------------------------------------|

|               |                 |  |  |                                                                                                                              |  |                   |                     |
|---------------|-----------------|--|--|------------------------------------------------------------------------------------------------------------------------------|--|-------------------|---------------------|
|               |                 |  |  |                                                                                                                              |  |                   | Steering Committee) |
| Lorenzo       | Redondo-Collazo |  |  | Hospital Clínico Universitario de Santiago, Santiago de Compostela                                                           |  | Consortium member |                     |
| Antonio       | Salas           |  |  | Hospital Clínico Universitario de Santiago, Santiago de Compostela                                                           |  | Consortium member |                     |
| Sonia Serén   | Fernández       |  |  | Hospital Clínico Universitario de Santiago, Santiago de Compostela                                                           |  | Consortium member |                     |
| Marisol Vilas | Iglesias        |  |  | Hospital Clínico Universitario de Santiago, Santiago de Compostela                                                           |  | Consortium member |                     |
| Enitan D      | Carrol          |  |  | University of Liverpool Institute of Infection, Veterinary and Ecological Sciences; Alder Hey Children's Hospital, Liverpool |  | Consortium member |                     |
| Elizabeth     | Cocklin         |  |  | University of Liverpool Institute of Infection, Veterinary and Ecological Sciences; Alder Hey Children's Hospital, Liverpool |  | Consortium member |                     |
| Rebecca       | Beckley         |  |  | University of Liverpool Institute of Infection, Veterinary and Ecological Sciences; Alder Hey Children's                     |  | Consortium member |                     |

|         |          |  |  |                                                                                                                                                         |  |                      |  |
|---------|----------|--|--|---------------------------------------------------------------------------------------------------------------------------------------------------------|--|----------------------|--|
|         |          |  |  | Hospital,<br>Liverpool                                                                                                                                  |  |                      |  |
| Abbey   | Bracken  |  |  | University of<br>Liverpool<br>Institute of<br>Infection,<br>Veterinary and<br>Ecological<br>Sciences; Alder<br>Hey Children's<br>Hospital,<br>Liverpool |  | Consortium<br>member |  |
| Ceri    | Evans    |  |  | University of<br>Liverpool<br>Institute of<br>Infection,<br>Veterinary and<br>Ecological<br>Sciences; Alder<br>Hey Children's<br>Hospital,<br>Liverpool |  | Consortium<br>member |  |
| Aakash  | Khanijau |  |  | University of<br>Liverpool<br>Institute of<br>Infection,<br>Veterinary and<br>Ecological<br>Sciences; Alder<br>Hey Children's<br>Hospital,<br>Liverpool |  | Consortium<br>member |  |
| Rebecca | Lenihan  |  |  | University of<br>Liverpool<br>Institute of<br>Infection,<br>Veterinary and<br>Ecological<br>Sciences; Alder<br>Hey Children's<br>Hospital,<br>Liverpool |  | Consortium<br>member |  |

v 02-22 8 of 22

Supplemental Online Content: Nonauthor Collaborators

\*First name, last name, and suffix (if applicable) are required and will appear in PubMed.



| <b>*First Name and Middle Initial(s)</b> | <b>*Last Name</b> | <b>*Suffix (eg, Jr, III)</b> | <b>Academic Degrees</b> | <b>Institution</b>                                                                     | <b>Location (city, state/province, country)</b> | <b>Role or Contribution, eg, chair, principal investigator</b> | <b>Group (if more than 1 Group listed in the byline) and/or Subgroup (eg, Steering Committee)</b> |
|------------------------------------------|-------------------|------------------------------|-------------------------|----------------------------------------------------------------------------------------|-------------------------------------------------|----------------------------------------------------------------|---------------------------------------------------------------------------------------------------|
| Nadia                                    | Lewis-Burke       |                              |                         | University of Liverpool<br>Institute of Infection, Veterinary and Ecological Sciences; |                                                 | Consortium member                                              |                                                                                                   |
| Karen                                    | Newall            |                              |                         | Alder Hey Children's Hospital, Liverpool                                               |                                                 | Consortium member                                              |                                                                                                   |
| Sam                                      | Romaine           |                              |                         | Alder Hey Children's Hospital, Liverpool                                               |                                                 | Consortium member                                              |                                                                                                   |
| Jennifer                                 | Whitbread         |                              |                         | Alder Hey Children's Hospital, Liverpool                                               |                                                 | Consortium member                                              |                                                                                                   |
| Maria                                    | Tsolia            |                              |                         | National and Kapodistrian University of Athens                                         |                                                 | Consortium member                                              |                                                                                                   |
| Irini                                    | Eleftheriou       |                              |                         | National and Kapodistrian University of Athens                                         |                                                 | Consortium member                                              |                                                                                                   |
| Nikos                                    | Spyridis          |                              |                         | National and Kapodistrian University of Athens                                         |                                                 | Consortium member                                              |                                                                                                   |
| Maria                                    | Tambouratzi       |                              |                         | National and Kapodistrian University of Athens                                         |                                                 | Consortium member                                              |                                                                                                   |

|             |             |  |  |                                                |  |                   |  |
|-------------|-------------|--|--|------------------------------------------------|--|-------------------|--|
| Despoina    | Maritsi     |  |  | National and Kapodistrian University of Athens |  | Consortium member |  |
| Antonios    | Marmarinos  |  |  | National and Kapodistrian University of Athens |  | Consortium member |  |
| Marietta    | Xagorari    |  |  | National and Kapodistrian University of Athens |  | Consortium member |  |
| Lourida     | Panagiota   |  |  | National and Kapodistrian University of Athens |  | Consortium member |  |
| Pefanis     | Aggelos     |  |  | National and Kapodistrian University of Athens |  | Consortium member |  |
| Akinosoglou | Karolina    |  |  | National and Kapodistrian University of Athens |  | Consortium member |  |
| Gogos       | Charalambos |  |  | National and Kapodistrian University of Athens |  | Consortium member |  |
| Maragos     | Markos      |  |  | National and Kapodistrian University of Athens |  | Consortium member |  |
| Voulgarelis | Michalis    |  |  | National and Kapodistrian University of Athens |  | Consortium member |  |

v 02-22 9 of 22

#### Supplemental Online Content: Nonauthor Collaborators

\*First name, last name, and suffix (if applicable) are required and will appear in PubMed.

| <b>*First Name and Middle Initial(s)</b> | <b>*Last Name</b> | <b>*Suffix (eg, Jr, III)</b> | <b>Academic Degrees</b> | <b>Institution</b> | <b>Location (city, state/province, country)</b> | <b>Role or Contribution, eg, chair, principal investigator</b> | <b>Group (if more than 1 Group listed in the byline) and/or Subgroup (eg, Steering Committee)</b> |
|------------------------------------------|-------------------|------------------------------|-------------------------|--------------------|-------------------------------------------------|----------------------------------------------------------------|---------------------------------------------------------------------------------------------------|
|------------------------------------------|-------------------|------------------------------|-------------------------|--------------------|-------------------------------------------------|----------------------------------------------------------------|---------------------------------------------------------------------------------------------------|

|          |         |  |  |                                                                                  |  |                   |  |
|----------|---------|--|--|----------------------------------------------------------------------------------|--|-------------------|--|
| Stergiou | Ioanna  |  |  | National and Kapodistrian University of Athens                                   |  | Consortium member |  |
| Marieke  | Emonts  |  |  | Newcastle upon Tyne Hospitals NHS Foundation Trust and Newcastle University (UK) |  | Consortium member |  |
| Emma     | Lim     |  |  | Newcastle upon Tyne Hospitals NHS Foundation Trust and Newcastle University (UK) |  | Consortium member |  |
| John     | Isaacs  |  |  | Newcastle upon Tyne Hospitals NHS Foundation Trust and Newcastle University (UK) |  | Consortium member |  |
| Kathryn  | Bell    |  |  | Newcastle upon Tyne Hospitals NHS Foundation Trust and Newcastle University (UK) |  | Consortium member |  |
| Stephen  | Crulley |  |  | Newcastle upon Tyne Hospitals NHS Foundation Trust and Newcastle University (UK) |  | Consortium member |  |
| Daniel   | Fabian  |  |  | Newcastle upon Tyne Hospitals NHS Foundation Trust and Newcastle University (UK) |  | Consortium member |  |
| Evelyn   | Thomson |  |  | Newcastle upon Tyne Hospitals NHS Foundation                                     |  | Consortium member |  |

|            |                |  |  |                                                                                  |  |                   |  |
|------------|----------------|--|--|----------------------------------------------------------------------------------|--|-------------------|--|
|            |                |  |  | Trust and Newcastle University (UK)                                              |  |                   |  |
| Diane      | Wallia         |  |  | Newcastle upon Tyne Hospitals NHS Foundation Trust and Newcastle University (UK) |  | Consortium member |  |
| Caroline   | Miller         |  |  | Newcastle upon Tyne Hospitals NHS Foundation Trust and Newcastle University (UK) |  | Consortium member |  |
| Ashley     | Bell           |  |  | Newcastle upon Tyne Hospitals NHS Foundation Trust and Newcastle University (UK) |  | Consortium member |  |
| Fabian J S | van der Velden |  |  | Newcastle upon Tyne Hospitals NHS Foundation Trust and Newcastle University (UK) |  | Consortium member |  |

v 02-22 10 of 22

#### Supplemental Online Content: Nonauthor Collaborators

\*First name, last name, and suffix (if applicable) are required and will appear in PubMed.

| <b>*First Name and Middle Initial(s)</b> | <b>*Last Name</b> | <b>*Suffix (eg, Jr, III)</b> | <b>Academic Degrees</b> | <b>Institution</b>                                     | <b>Location (city, state/province, country)</b> | <b>Role or Contribution, eg, chair, principal investigator</b> | <b>Group (if more than 1 Group listed in the byline) and/or Subgroup (eg, Steering Committee)</b> |
|------------------------------------------|-------------------|------------------------------|-------------------------|--------------------------------------------------------|-------------------------------------------------|----------------------------------------------------------------|---------------------------------------------------------------------------------------------------|
| Geoff                                    | Shenton           |                              |                         | Newcastle upon Tyne Hospitals NHS Foundation Trust and |                                                 | Consortium member                                              |                                                                                                   |

|          |            |  |  |                                                                                                                |  |                   |  |
|----------|------------|--|--|----------------------------------------------------------------------------------------------------------------|--|-------------------|--|
|          |            |  |  | Newcastle University (UK)                                                                                      |  |                   |  |
| Ashley   | Price      |  |  | Newcastle upon Tyne Hospitals NHS Foundation Trust and Newcastle University (UK)                               |  | Consortium member |  |
| Owen     | Treloar    |  |  | Newcastle upon Tyne Hospitals NHS Foundation Trust and Newcastle University (UK)                               |  | Consortium member |  |
| Daisy    | Thomas     |  |  | Newcastle upon Tyne Hospitals NHS Foundation Trust and Newcastle University (UK)                               |  | Consortium member |  |
| Pablo    | Rojo       |  |  | Servicio Madrileño de Salud (SERMAS) - Fundación Biomédica del Hospital Universitario 12 de Octubre (FIB-H12O) |  | Consortium member |  |
| Cristina | Epalza     |  |  | Servicio Madrileño de Salud (SERMAS) - Fundación Biomédica del Hospital Universitario 12 de Octubre (FIB-H12O) |  | Consortium member |  |
| Serena   | Villaverde |  |  | Servicio Madrileño de Salud (SERMAS) - Fundación Biomédica del Hospital Universitario 12 de Octubre (FIB-H12O) |  | Consortium member |  |

|        |         |  |  |                                                                                                                   |  |                   |  |
|--------|---------|--|--|-------------------------------------------------------------------------------------------------------------------|--|-------------------|--|
| Sonia  | Márquez |  |  | Servicio Madrileño de Salud (SERMAS)<br>- Fundación Biomédica del Hospital Universitario 12 de Octubre (FIB-H12O) |  | Consortium member |  |
| Manuel | Gijón   |  |  | Servicio Madrileño de Salud (SERMAS)<br>- Fundación Biomédica del Hospital Universitario 12 de Octubre (FIB-H12O) |  | Consortium member |  |
| Fátima | Machín  |  |  | Servicio Madrileño de Salud (SERMAS)<br>- Fundación Biomédica del Hospital Universitario 12 de Octubre (FIB-H12O) |  | Consortium member |  |

v 02-22 11 of 22

#### Supplemental Online Content: Nonauthor Collaborators

\*First name, last name, and suffix (if applicable) are required and will appear in PubMed.

| <b>*First Name and Middle Initial(s)</b> | <b>*Last Name</b> | <b>*Suffix (eg, Jr, III)</b> | <b>Academic Degrees</b> | <b>Institution</b>                                                                                             | <b>Location (city, state/province, country)</b> | <b>Role or Contribution, eg, chair, principal investigator</b> | <b>Group (if more than 1 Group listed in the byline) and/or Subgroup (eg, Steering Committee)</b> |
|------------------------------------------|-------------------|------------------------------|-------------------------|----------------------------------------------------------------------------------------------------------------|-------------------------------------------------|----------------------------------------------------------------|---------------------------------------------------------------------------------------------------|
| Laura                                    | Cabello           |                              |                         | Servicio Madrileño de Salud (SERMAS) - Fundación Biomédica del Hospital Universitario 12 de Octubre (FIB-H12O) |                                                 | Consortium member                                              |                                                                                                   |

|           |              |  |  |                                                                                                                |  |                   |  |
|-----------|--------------|--|--|----------------------------------------------------------------------------------------------------------------|--|-------------------|--|
| Irene     | Hernández    |  |  | Servicio Madrileño de Salud (SERMAS) - Fundación Biomédica del Hospital Universitario 12 de Octubre (FIB-H12O) |  | Consortium member |  |
| Lourdes   | Gutiérrez    |  |  | Servicio Madrileño de Salud (SERMAS) - Fundación Biomédica del Hospital Universitario 12 de Octubre (FIB-H12O) |  | Consortium member |  |
| Ángela    | Manzanares   |  |  | Servicio Madrileño de Salud (SERMAS) - Fundación Biomédica del Hospital Universitario 12 de Octubre (FIB-H12O) |  | Consortium member |  |
| Taco W    | Kuijpers     |  |  | Amsterdam University Medical Center                                                                            |  | Consortium member |  |
| Martijn   | van de Kuip  |  |  | Amsterdam University Medical Center                                                                            |  | Consortium member |  |
| Marceline | van Furth    |  |  | Amsterdam University Medical Center                                                                            |  | Consortium member |  |
| Merlijn   | van den Berg |  |  | Amsterdam University Medical Center                                                                            |  | Consortium member |  |
| Giske     | Biesbroek    |  |  | Amsterdam University Medical Center                                                                            |  | Consortium member |  |

|               |               |  |  |                                     |  |                   |  |
|---------------|---------------|--|--|-------------------------------------|--|-------------------|--|
| Floris        | Verkuil       |  |  | Amsterdam University Medical Center |  | Consortium member |  |
| Carlijn       | van der Zee   |  |  | Amsterdam University Medical Center |  | Consortium member |  |
| Dasja         | Pajkrt        |  |  | Amsterdam University Medical Center |  | Consortium member |  |
| Michael Boele | van Hensbroek |  |  | Amsterdam University Medical Center |  | Consortium member |  |
| Dieneke       | Schonenberg   |  |  | Amsterdam University Medical Center |  | Consortium member |  |

v 02-22 12 of 22

#### Supplemental Online Content: Nonauthor Collaborators

\*First name, last name, and suffix (if applicable) are required and will appear in PubMed.

| <b>*First Name and Middle Initial(s)</b> | <b>*Last Name</b> | <b>*Suffix (eg, Jr, III)</b> | <b>Academic Degrees</b> | <b>Institution</b>                  | <b>Location (city, state/province, country)</b> | <b>Role or Contribution, eg, chair, principal investigator</b> | <b>Group (if more than 1 Group listed in the byline) and/or Subgroup (eg, Steering Committee)</b> |
|------------------------------------------|-------------------|------------------------------|-------------------------|-------------------------------------|-------------------------------------------------|----------------------------------------------------------------|---------------------------------------------------------------------------------------------------|
| Mariken                                  | Gruppen           |                              |                         | Amsterdam University Medical Center |                                                 | Consortium member                                              |                                                                                                   |
| Sietse                                   | Nagelkerke        |                              |                         | Amsterdam University Medical Center |                                                 | Consortium member                                              |                                                                                                   |
| MachielH                                 | Jansen            |                              |                         | Amsterdam University Medical Center |                                                 | Consortium member                                              |                                                                                                   |
| Ines                                     | Goetschalckx      |                              |                         | Amsterdam University Medical Center |                                                 | Consortium member                                              |                                                                                                   |



|                 |             |  |  |                                                    |  |                      |  |
|-----------------|-------------|--|--|----------------------------------------------------|--|----------------------|--|
| Lorenza         | Romani      |  |  | Bambino<br>Gesù<br>Children's<br>Hospital,<br>Rome |  | Consortium<br>member |  |
| Maia            | De Luca     |  |  | Bambino<br>Gesù<br>Children's<br>Hospital,<br>Rome |  | Consortium<br>member |  |
| Sara            | Chiurchiù   |  |  | Bambino<br>Gesù<br>Children's<br>Hospital,<br>Rome |  | Consortium<br>member |  |
| Costanza        | Tripiciano  |  |  | Bambino<br>Gesù<br>Children's<br>Hospital,<br>Rome |  | Consortium<br>member |  |
| Stefania        | Mercadante  |  |  | Bambino<br>Gesù<br>Children's<br>Hospital,<br>Rome |  | Consortium<br>member |  |
| Clementien<br>L | Vermont     |  |  | ERASMUS<br>MC-Sophia<br>Children's<br>Hospital     |  | Consortium<br>member |  |
| Henriëtte A     | Moll        |  |  | ERASMUS<br>MC-Sophia<br>Children's<br>Hospital     |  | Consortium<br>member |  |
| Dorine M        | Borensztajn |  |  | ERASMUS<br>MC-Sophia<br>Children's<br>Hospital     |  | Consortium<br>member |  |
| Nienke N        | Hagedoorn   |  |  | ERASMUS<br>MC-Sophia<br>Children's<br>Hospital     |  | Consortium<br>member |  |
| Chantal         | Tan         |  |  | ERASMUS<br>MC-Sophia<br>Children's<br>Hospital     |  | Consortium<br>member |  |
| Joany           | Zachariasse |  |  | ERASMUS<br>MC-Sophia<br>Children's<br>Hospital     |  | Consortium<br>member |  |

|           |      |  |  |                                                                                                                                 |  |                      |  |
|-----------|------|--|--|---------------------------------------------------------------------------------------------------------------------------------|--|----------------------|--|
| W         | Dik  |  |  | ERASMUS<br>MC-Sophia<br>Children's<br>Hospital                                                                                  |  | Consortium<br>member |  |
| Ching-Fen | Shen |  |  | National<br>Cheng Kung<br>University<br>Hospital,<br>College of<br>Medicine,<br>National<br>Cheng Kung<br>University,<br>Taiwan |  | Consortium<br>member |  |

v 02-22 13 of 22

#### Supplemental Online Content: Nonauthor Collaborators

\*First name, last name, and suffix (if applicable) are required and will appear in PubMed.

| <b>*First<br/>Name and<br/>Middle<br/>Initial(s)</b> | <b>*Last<br/>Name</b> | <b>*Suffix<br/>(eg, Jr,<br/>III)</b> | <b>Academic<br/>Degrees</b> | <b>Institution</b>                                      | <b>Location (city,<br/>state/province,<br/>country)</b> | <b>Role or<br/>Contribution,<br/>eg, chair,<br/>principal<br/>investigator</b> | <b>Group (if<br/>more than 1<br/>Group listed<br/>in the byline)<br/>and/or<br/>Subgroup (eg,<br/>Steering<br/>Committee)</b> |
|------------------------------------------------------|-----------------------|--------------------------------------|-----------------------------|---------------------------------------------------------|---------------------------------------------------------|--------------------------------------------------------------------------------|-------------------------------------------------------------------------------------------------------------------------------|
| Dace                                                 | Zavadska              |                                      |                             | Riga Stradins<br>University                             |                                                         | Consortium<br>member                                                           |                                                                                                                               |
| Sniedze                                              | Laivacuma             |                                      |                             | Riga Stradins<br>University                             |                                                         | Consortium<br>member                                                           |                                                                                                                               |
| Aleksandra                                           | Rudzate               |                                      |                             | Riga Stradins<br>University                             |                                                         | Consortium<br>member                                                           |                                                                                                                               |
| Diana                                                | Stoldere              |                                      |                             | Riga Stradins<br>University                             |                                                         | Consortium<br>member                                                           |                                                                                                                               |
| Arta                                                 | Barzdina              |                                      |                             | Riga Stradins<br>University                             |                                                         | Consortium<br>member                                                           |                                                                                                                               |
| Elza                                                 | Barzdina              |                                      |                             | Riga Stradins<br>University                             |                                                         | Consortium<br>member                                                           |                                                                                                                               |
| Sniedze                                              | Laivacuma             |                                      |                             | Riga Stradins<br>University                             |                                                         | Consortium<br>member                                                           |                                                                                                                               |
| Monta                                                | Madelane              |                                      |                             | Riga Stradins<br>University                             |                                                         | Consortium<br>member                                                           |                                                                                                                               |
| Dagne                                                | Gravele               |                                      |                             | Children<br>clinical<br>university<br>hospital,<br>Riga |                                                         | Consortium<br>member                                                           |                                                                                                                               |

|         |          |  |  |                                                                                                                     |  |                      |  |
|---------|----------|--|--|---------------------------------------------------------------------------------------------------------------------|--|----------------------|--|
| Dace    | Svilz    |  |  | Children<br>clinical<br>university<br>hospital,<br>Riga                                                             |  | Consortium<br>member |  |
| Romain  | Basmaci  |  |  | Service de<br>Pédiatrie-<br>Urgences,<br>AP-HP,<br>Hôpital<br>Louis-<br>Mourier, F-<br>92700<br>Colombes,<br>France |  | Consortium<br>member |  |
| Noémie  | Lachaume |  |  | Service de<br>Pédiatrie-<br>Urgences,<br>AP-HP,<br>Hôpital<br>Louis-<br>Mourier, F-<br>92700<br>Colombes,<br>France |  | Consortium<br>member |  |
| Pauline | Bories   |  |  | Service de<br>Pédiatrie-<br>Urgences,<br>AP-HP,<br>Hôpital<br>Louis-<br>Mourier, F-<br>92700<br>Colombes,<br>France |  | Consortium<br>member |  |
| RajaBen | Tkhatat  |  |  | Service de<br>Pédiatrie-<br>Urgences,<br>AP-HP,<br>Hôpital<br>Louis-<br>Mourier, F-<br>92700<br>Colombes,<br>France |  | Consortium<br>member |  |
| Laura   | Chériaux |  |  | Service de<br>Pédiatrie-<br>Urgences,<br>AP-HP,<br>Hôpital<br>Louis-                                                |  | Consortium<br>member |  |

|           |          |  |  |                                                                                                                     |  |                      |  |
|-----------|----------|--|--|---------------------------------------------------------------------------------------------------------------------|--|----------------------|--|
|           |          |  |  | Mourier, F-92700<br>Colombes,<br>France                                                                             |  |                      |  |
| Juraté    | Davoust  |  |  | Service de<br>Pédiatrie-<br>Urgences,<br>AP-HP,<br>Hôpital<br>Louis-<br>Mourier, F-<br>92700<br>Colombes,<br>France |  | Consortium<br>member |  |
| Kim-Thanh | Ong      |  |  | Service de<br>Pédiatrie-<br>Urgences,<br>AP-HP,<br>Hôpital<br>Louis-<br>Mourier, F-<br>92700<br>Colombes,<br>France |  | Consortium<br>member |  |
| Marie     | Cotillon |  |  | Service de<br>Pédiatrie-<br>Urgences,<br>AP-HP,<br>Hôpital<br>Louis-<br>Mourier, F-<br>92700<br>Colombes,<br>France |  | Consortium<br>member |  |

v 02-22 14 of 22

#### Supplemental Online Content: Nonauthor Collaborators

\*First name, last name, and suffix (if applicable) are required and will appear in PubMed.

| <b>*First<br/>Name<br/>and<br/>Middle<br/>Initial(s)</b> | <b>*Last<br/>Name</b> | <b>*Suffix<br/>(eg, Jr,<br/>III)</b> | Academic<br>Degrees | Institution              | Location (city,<br>state/province,<br>country) | Role or<br>Contribution,<br>eg, chair,<br>principal<br>investigator | Group (if<br>more than 1<br>Group listed<br>in the byline)<br>and/or<br>Subgroup (eg,<br>Steering<br>Committee) |
|----------------------------------------------------------|-----------------------|--------------------------------------|---------------------|--------------------------|------------------------------------------------|---------------------------------------------------------------------|-----------------------------------------------------------------------------------------------------------------|
| Thibault                                                 | de Groc               |                                      |                     | Service de<br>Pédiatrie- |                                                | Consortium<br>member                                                |                                                                                                                 |

|           |           |  |  |                                                                                                                                                           |  |                   |  |
|-----------|-----------|--|--|-----------------------------------------------------------------------------------------------------------------------------------------------------------|--|-------------------|--|
| Sébastien | Le        |  |  | Urgences, AP-HP, Hôpital Louis-Mourier, F-92700 Colombes, France<br>Service de Pédiatrie-Urgences, AP-HP, Hôpital Louis-Mourier, F-92700 Colombes, France |  | Consortium member |  |
| Nathalie  | Vergnault |  |  | Service de Pédiatrie-Urgences, AP-HP, Hôpital Louis-Mourier, F-92700 Colombes, France                                                                     |  | Consortium member |  |
| Hélène    | Sée       |  |  | Service de Pédiatrie-Urgences, AP-HP, Hôpital Louis-Mourier, F-92700 Colombes, France                                                                     |  | Consortium member |  |
| Laure     | Cohen     |  |  | Service de Pédiatrie-Urgences, AP-HP, Hôpital Louis-Mourier, F-92700 Colombes, France                                                                     |  | Consortium member |  |
| Alice     | de Tugny  |  |  | Service de Pédiatrie-Urgences, AP-HP, Hôpital Louis-Mourier, F-92700 Colombes, France                                                                     |  | Consortium member |  |
| Nevena    | Danekova  |  |  | Service de Pédiatrie-Urgences, AP-HP, Hôpital Louis-Mourier,                                                                                              |  | Consortium member |  |

|        |                |  |  |                                                                                              |  |                      |  |
|--------|----------------|--|--|----------------------------------------------------------------------------------------------|--|----------------------|--|
|        |                |  |  | F-92700<br>Colombes,<br>France                                                               |  |                      |  |
| Marine | Mommert-Tripon |  |  | BioMérieux -<br>Open<br>Innovation &<br>Partnerships<br>Department,<br>Lyon,<br>Franceérieux |  | Consortium<br>member |  |
| Karen  | Brengel-Pesce  |  |  | BioMérieux -<br>Open<br>Innovation &<br>Partnerships<br>Department,<br>Lyon,<br>Franceérieux |  | Consortium<br>member |  |
| Marko  | Pokorn         |  |  | University<br>Medical<br>Centre<br>Ljubljana,<br>Slovenia                                    |  | Consortium<br>member |  |
| Mojca  | Kolnik         |  |  | University<br>Medical<br>Centre<br>Ljubljana,<br>Slovenia                                    |  | Consortium<br>member |  |
| Tadej  | Avčin          |  |  | University<br>Medical<br>Centre<br>Ljubljana,<br>Slovenia                                    |  | Consortium<br>member |  |
| Tanja  | Avramoska      |  |  | University<br>Medical<br>Centre<br>Ljubljana,<br>Slovenia                                    |  | Consortium<br>member |  |

v 02-22 15 of 22

#### Supplemental Online Content: Nonauthor Collaborators

\*First name, last name, and suffix (if applicable) are required and will appear in PubMed.

| <b>*First<br/>Name and<br/>Middle<br/>Initial(s)</b> | <b>*Last<br/>Name</b> | <b>*Suffix<br/>(eg, Jr,<br/>III)</b> | Academic<br>Degrees | Institution | Location (city,<br>state/province,<br>country) | Role or<br>Contribution,<br>eg, chair,<br>principal<br>investigator | Group (if<br>more than 1<br>Group listed<br>in the byline)<br>and/or<br>Subgroup (eg, |
|------------------------------------------------------|-----------------------|--------------------------------------|---------------------|-------------|------------------------------------------------|---------------------------------------------------------------------|---------------------------------------------------------------------------------------|
|------------------------------------------------------|-----------------------|--------------------------------------|---------------------|-------------|------------------------------------------------|---------------------------------------------------------------------|---------------------------------------------------------------------------------------|

|          |                |  |  |                                               |  |                   |                     |
|----------|----------------|--|--|-----------------------------------------------|--|-------------------|---------------------|
|          |                |  |  |                                               |  |                   | Steering Committee) |
| Natalija | Bahovec        |  |  | University Medical Centre Ljubljana, Slovenia |  | Consortium member |                     |
| Petra    | Bogovič        |  |  | University Medical Centre Ljubljana, Slovenia |  | Consortium member |                     |
| Lidija   | Kitanovski     |  |  | University Medical Centre Ljubljana, Slovenia |  | Consortium member |                     |
| Mirijam  | Nahtigal       |  |  | University Medical Centre Ljubljana, Slovenia |  | Consortium member |                     |
| Lea      | Papst          |  |  | University Medical Centre Ljubljana, Slovenia |  | Consortium member |                     |
| Tina     | Plankar Srovin |  |  | University Medical Centre Ljubljana, Slovenia |  | Consortium member |                     |
| Franc    | Strle          |  |  | University Medical Centre Ljubljana, Slovenia |  | Consortium member |                     |
| Katarina | Vincek         |  |  | University Medical Centre Ljubljana, Slovenia |  | Consortium member |                     |
| Michiel  | van der Flier  |  |  | University Medical Center Utrecht, Utrecht    |  | Consortium member |                     |
| Wim J E  | Tissing        |  |  | University Medical Center                     |  | Consortium member |                     |

|                 |                           |  |  |                                                                                          |  |                      |  |
|-----------------|---------------------------|--|--|------------------------------------------------------------------------------------------|--|----------------------|--|
|                 |                           |  |  | Utrecht,<br>Utrecht                                                                      |  |                      |  |
| Roelie M        | Wösten-<br>van<br>Asperen |  |  | University<br>Medical<br>Center<br>Utrecht,<br>Utrecht                                   |  | Consortium<br>member |  |
| Sebastiaan<br>J | Vastert                   |  |  | University<br>Medical<br>Center<br>Utrecht,<br>Utrecht                                   |  | Consortium<br>member |  |
| Daniel C        | Vijlbrief                 |  |  | University<br>Medical<br>Center<br>Utrecht,<br>Utrecht                                   |  | Consortium<br>member |  |
| Louis J         | Bont                      |  |  | University<br>Medical<br>Center<br>Utrecht,<br>Utrecht                                   |  | Consortium<br>member |  |
| Coco R          | Beudeker                  |  |  | University<br>Medical<br>Center<br>Utrecht,<br>Utrecht                                   |  | Consortium<br>member |  |
| Philipp         | Agyeman                   |  |  | Inselspital,<br>Bern<br>University<br>Hospital,<br>University of<br>Bern,<br>Switzerland |  | Consortium<br>member |  |
| Luregn          | Schlapbach                |  |  | Inselspital,<br>Bern<br>University<br>Hospital,<br>University of<br>Bern,<br>Switzerland |  | Consortium<br>member |  |
| Christoph       | Aebi                      |  |  | Inselspital,<br>Bern<br>University<br>Hospital,<br>University of<br>Bern,<br>Switzerland |  | Consortium<br>member |  |



Supplemental Online Content: Nonauthor Collaborators

\*First name, last name, and suffix (if applicable) are required and will appear in PubMed.

| <b>*First Name and Middle Initial(s)</b> | <b>*Last Name</b> | <b>*Suffix (eg, Jr, III)</b> | <b>Academic Degrees</b> | <b>Institution</b>                                                     | <b>Location (city, state/province, country)</b> | <b>Role or Contribution, eg, chair, principal investigator</b> | <b>Group (if more than 1 Group listed in the byline) and/or Subgroup (eg, Steering Committee)</b> |
|------------------------------------------|-------------------|------------------------------|-------------------------|------------------------------------------------------------------------|-------------------------------------------------|----------------------------------------------------------------|---------------------------------------------------------------------------------------------------|
| Mariama                                  | Usman             |                              |                         | Inselspital, Bern University Hospital, University of Bern, Switzerland |                                                 | Consortium member                                              |                                                                                                   |
| Stefanie                                 | Schlüchter        |                              |                         | Inselspital, Bern University Hospital, University of Bern, Switzerland |                                                 | Consortium member                                              |                                                                                                   |
| Verena                                   | Wyss              |                              |                         | Inselspital, Bern University Hospital, University of Bern, Switzerland |                                                 | Consortium member                                              |                                                                                                   |
| Nina                                     | Schöbi            |                              |                         | Inselspital, Bern University Hospital, University of Bern, Switzerland |                                                 | Consortium member                                              |                                                                                                   |
| Elisa                                    | Zimmermann        |                              |                         | Inselspital, Bern University Hospital, University of Bern, Switzerland |                                                 | Consortium member                                              |                                                                                                   |
| Marion                                   | Meier             |                              |                         | Inselspital, Bern University Hospital, University of Bern, Switzerland |                                                 | Consortium member                                              |                                                                                                   |
| Kathrin                                  | Weber             |                              |                         | Inselspital, Bern University                                           |                                                 | Consortium member                                              |                                                                                                   |

|          |            |  |  |                                                                                                                                   |  |                      |  |
|----------|------------|--|--|-----------------------------------------------------------------------------------------------------------------------------------|--|----------------------|--|
|          |            |  |  | Hospital,<br>University of<br>Bern,<br>Switzerland                                                                                |  |                      |  |
| Colin    | Fink       |  |  | Micropathology<br>Ltd, The<br>Venture Center,<br>University of<br>Warwick<br>Science Park, Sir<br>William Lyons<br>Road, Coventry |  | Consortium<br>member |  |
| Marie    | Voice      |  |  | Micropathology<br>Ltd, The<br>Venture Center,<br>University of<br>Warwick<br>Science Park, Sir<br>William Lyons<br>Road, Coventry |  | Consortium<br>member |  |
| Leo      | Calvo-Bado |  |  | Micropathology<br>Ltd, The<br>Venture Center,<br>University of<br>Warwick<br>Science Park, Sir<br>William Lyons<br>Road, Coventry |  | Consortium<br>member |  |
| Michael  | Steele     |  |  | Micropathology<br>Ltd, The<br>Venture Center,<br>University of<br>Warwick<br>Science Park, Sir<br>William Lyons<br>Road, Coventry |  | Consortium<br>member |  |
| Jennifer | Holden     |  |  | Micropathology<br>Ltd, The<br>Venture Center,<br>University of<br>Warwick<br>Science Park, Sir<br>William Lyons<br>Road, Coventry |  | Consortium<br>member |  |

v 02-22 17 of 22

Supplemental Online Content: Nonauthor Collaborators

\*First name, last name, and suffix (if applicable) are required and will appear in PubMed.

| <b>*First Name and Middle Initial(s)</b> | <b>*Last Name</b> | <b>*Suffix (eg, Jr, III)</b> | <b>Academic Degrees</b> | <b>Institution</b>                                                                                           | <b>Location (city, state/province, country)</b> | <b>Role or Contribution, eg, chair, principal investigator</b> | <b>Group (if more than 1 Group listed in the byline) and/or Subgroup (eg, Steering Committee)</b> |
|------------------------------------------|-------------------|------------------------------|-------------------------|--------------------------------------------------------------------------------------------------------------|-------------------------------------------------|----------------------------------------------------------------|---------------------------------------------------------------------------------------------------|
| Andrew                                   | Taylor            |                              |                         | Micropathology Ltd, The Venture Center, University of Warwick Science Park, Sir William Lyons Road, Coventry |                                                 | Consortium member                                              |                                                                                                   |
| Ronan                                    | Calvez            |                              |                         | Micropathology Ltd, The Venture Center, University of Warwick Science Park, Sir William Lyons Road, Coventry |                                                 | Consortium member                                              |                                                                                                   |
| Catherine                                | Davies            |                              |                         | Micropathology Ltd, The Venture Center, University of Warwick Science Park, Sir William Lyons Road, Coventry |                                                 | Consortium member                                              |                                                                                                   |
| Benjamin                                 | Evans             |                              |                         | Micropathology Ltd, The Venture Center, University of Warwick Science Park, Sir William Lyons Road, Coventry |                                                 | Consortium member                                              |                                                                                                   |
| Jake                                     | Stevens           |                              |                         | Micropathology Ltd, The Venture Center, University of Warwick Science Park, Sir William Lyons Road, Coventry |                                                 | Consortium member                                              |                                                                                                   |

|           |              |  |  |                                                                                                              |  |                   |  |
|-----------|--------------|--|--|--------------------------------------------------------------------------------------------------------------|--|-------------------|--|
| Peter     | Matthews     |  |  | Micropathology Ltd, The Venture Center, University of Warwick Science Park, Sir William Lyons Road, Coventry |  | Consortium member |  |
| Kyle      | Billing      |  |  | Micropathology Ltd, The Venture Center, University of Warwick Science Park, Sir William Lyons Road, Coventry |  | Consortium member |  |
| Werner    | Zenz         |  |  | Medical University of Graz, Austria                                                                          |  | Consortium member |  |
| Alexander | Binder       |  |  | Medical University of Graz, Austria                                                                          |  | Consortium member |  |
| Benno     | Kohlmaier    |  |  | Medical University of Graz, Austria                                                                          |  | Consortium member |  |
| Daniela S | Kohlfürst    |  |  | Medical University of Graz, Austria                                                                          |  | Consortium member |  |
| Nina A    | Schweintzger |  |  | Medical University of Graz, Austria                                                                          |  | Consortium member |  |
| Christoph | Zurl         |  |  | Medical University of Graz, Austria                                                                          |  | Consortium member |  |
| Susanne   | Hösele       |  |  | Medical University of Graz, Austria                                                                          |  | Consortium member |  |
| Manuel    | Leitner      |  |  | Medical University of Graz, Austria                                                                          |  | Consortium member |  |

v 02-22 18 of 22

#### Supplemental Online Content: Nonauthor Collaborators

\*First name, last name, and suffix (if applicable) are required and will appear in PubMed.

| <b>*First Name and Middle Initial(s)</b> | <b>*Last Name</b> | <b>*Suffix (eg, Jr, III)</b> | <b>Academic Degrees</b> | <b>Institution</b> | <b>Location (city, state/province, country)</b> | <b>Role or Contribution, eg, chair,</b> | <b>Group (if more than 1 Group listed in the</b> |
|------------------------------------------|-------------------|------------------------------|-------------------------|--------------------|-------------------------------------------------|-----------------------------------------|--------------------------------------------------|
|------------------------------------------|-------------------|------------------------------|-------------------------|--------------------|-------------------------------------------------|-----------------------------------------|--------------------------------------------------|

|           |            |  |  |                                     |  |                        |                                                   |
|-----------|------------|--|--|-------------------------------------|--|------------------------|---------------------------------------------------|
|           |            |  |  |                                     |  | principal investigator | byline) and/or Subgroup (eg, Steering Committee ) |
| Lena      | Pölz       |  |  | Medical University of Graz, Austria |  | Consortium member      |                                                   |
| Alexandra | Rusu       |  |  | Medical University of Graz, Austria |  | Consortium member      |                                                   |
| Glorija   | Rajic      |  |  | Medical University of Graz, Austria |  | Consortium member      |                                                   |
| Bianca    | Stoiser    |  |  | Medical University of Graz, Austria |  | Consortium member      |                                                   |
| Martina   | Strempfl   |  |  | Medical University of Graz, Austria |  | Consortium member      |                                                   |
| Manfred G | Sagmeister |  |  | Medical University of Graz, Austria |  | Consortium member      |                                                   |
| Sebastian | Bauchinger |  |  | Medical University of Graz, Austria |  | Consortium member      |                                                   |
| Martin    | Benesch    |  |  | Medical University of Graz, Austria |  | Consortium member      |                                                   |
| Astrid    | Ceolotto   |  |  | Medical University of Graz, Austria |  | Consortium member      |                                                   |
| Ernst     | Eber       |  |  | Medical University of Graz, Austria |  | Consortium member      |                                                   |
| Siegfried | Gallistl   |  |  | Medical University of Graz, Austria |  | Consortium member      |                                                   |
| Harald    | Haidl      |  |  | Medical University of Graz, Austria |  | Consortium member      |                                                   |
| Almuthe   | Hauer      |  |  | Medical University of Graz, Austria |  | Consortium member      |                                                   |
| Christa   | Hude       |  |  | Medical University of Graz, Austria |  | Consortium member      |                                                   |

|            |                    |  |  |                                                                                                                                                                              |  |                   |  |
|------------|--------------------|--|--|------------------------------------------------------------------------------------------------------------------------------------------------------------------------------|--|-------------------|--|
| Andreas    | Kapper             |  |  | Medical University of Graz, Austria                                                                                                                                          |  | Consortium member |  |
| Markus     | Keldorfer          |  |  | Medical University of Graz, Austria                                                                                                                                          |  | Consortium member |  |
| Sabine     | Löffler            |  |  | Medical University of Graz, Austria                                                                                                                                          |  | Consortium member |  |
| Tobias     | Niedrist           |  |  | Medical University of Graz, Austria                                                                                                                                          |  | Consortium member |  |
| Heidemarie | Pilch              |  |  | Medical University of Graz, Austria                                                                                                                                          |  | Consortium member |  |
| Andreas    | Pfleger            |  |  | Medical University of Graz, Austria                                                                                                                                          |  | Consortium member |  |
| Klaus      | Pfurtscheller      |  |  | Medical University of Graz, Austria                                                                                                                                          |  | Consortium member |  |
| Siegfried  | Rödl               |  |  | Medical University of Graz, Austria                                                                                                                                          |  | Consortium member |  |
| Andrea     | Skrabl-Baumgartner |  |  | Medical University of Graz, Austria                                                                                                                                          |  | Consortium member |  |
| Volker     | Strenger           |  |  | Medical University of Graz, Austria                                                                                                                                          |  | Consortium member |  |
| Elmar      | Wallner            |  |  | Medical University of Graz, Austria                                                                                                                                          |  | Consortium member |  |
| Maike K    | Tauchert           |  |  | Biobanking and BioMolecular Resources Research Infrastructure - European Research Infrastructure Consortium (BBMRI-ERIC), Neue Stiftingtalstrasse 2/B/6, 8010, Graz, Austria |  | Consortium member |  |
| Shunmay    | Yeung              |  |  | London School of Hygiene and                                                                                                                                                 |  | Consortium member |  |

|        |       |  |  |                                                         |  |                      |  |
|--------|-------|--|--|---------------------------------------------------------|--|----------------------|--|
|        |       |  |  | Tropical<br>Medicine                                    |  |                      |  |
| Manuel | Dewez |  |  | London School<br>of Hygiene and<br>Tropical<br>Medicine |  | Consortium<br>member |  |

v 02-22 19 of 22

# Supplemental Online Content: Nonauthor Collaborators

\*First name, last name, and suffix (if applicable) are required and will appear in PubMed.

| <b>*First<br/>Name and<br/>Middle<br/>Initial(s)</b> | <b>*Last Name</b> | <b>*Suffix<br/>(eg, Jr,<br/>III)</b> | Academic<br>Degrees | Institution                                                   | Location (city,<br>state/province,<br>country) | Role or<br>Contribution,<br>eg, chair,<br>principal<br>investigator | Group (if<br>more than 1<br>Group listed<br>in the byline)<br>and/or<br>Subgroup (eg,<br>Steering<br>Committee) |
|------------------------------------------------------|-------------------|--------------------------------------|---------------------|---------------------------------------------------------------|------------------------------------------------|---------------------------------------------------------------------|-----------------------------------------------------------------------------------------------------------------|
| David                                                | Bath              |                                      |                     | London<br>School of<br>Hygiene<br>and<br>Tropical<br>Medicine |                                                | Consortium<br>member                                                |                                                                                                                 |
| Elizabeth                                            | Fitchett          |                                      |                     | London<br>School of<br>Hygiene<br>and<br>Tropical<br>Medicine |                                                | Consortium<br>member                                                |                                                                                                                 |
| Fiona                                                | Cresswell         |                                      |                     | London<br>School of<br>Hygiene<br>and<br>Tropical<br>Medicine |                                                | Consortium<br>member                                                |                                                                                                                 |
| Effua                                                | Usuf              |                                      |                     | Medical<br>Research<br>Council Unit<br>The Gambia<br>at LSHTM |                                                | Consortium<br>member                                                |                                                                                                                 |
| Kalifa                                               | Bojang            |                                      |                     | Medical<br>Research<br>Council Unit<br>The Gambia<br>at LSHTM |                                                | Consortium<br>member                                                |                                                                                                                 |
| Anna                                                 | Roca              |                                      |                     | Medical<br>Research                                           |                                                | Consortium<br>member                                                |                                                                                                                 |

|          |           |  |  |                                                                                          |  |                      |  |
|----------|-----------|--|--|------------------------------------------------------------------------------------------|--|----------------------|--|
|          |           |  |  | Council Unit<br>The Gambia<br>at LSHTM                                                   |  |                      |  |
| Isatou   | Sarr      |  |  | Medical<br>Research<br>Council Unit<br>The Gambia<br>at LSHTM                            |  | Consortium<br>member |  |
| Momodou  | Saidykhan |  |  | Medical<br>Research<br>Council Unit<br>The Gambia<br>at LSHTM                            |  | Consortium<br>member |  |
| Ebrahim  | Ndure     |  |  | Medical<br>Research<br>Council Unit<br>The Gambia<br>at LSHTM                            |  | Consortium<br>member |  |
| Ulrich   | von Both  |  |  | Dr. von<br>Hauner<br>Children's<br>Hospital,<br>University<br>Hospital,<br>LMU<br>Munich |  | Consortium<br>member |  |
| Laura    | Kolberg   |  |  | Dr. von<br>Hauner<br>Children's<br>Hospital,<br>University<br>Hospital,<br>LMU<br>Munich |  | Consortium<br>member |  |
| Patricia | Schmied   |  |  | Dr. von<br>Hauner<br>Children's<br>Hospital,<br>University<br>Hospital,<br>LMU<br>Munich |  | Consortium<br>member |  |
| Ioanna   | Mavridi   |  |  | Dr. von<br>Hauner<br>Children's<br>Hospital,<br>University<br>Hospital,<br>LMU<br>Munich |  | Consortium<br>member |  |



|          |                |  |  |                                                                     |  |                   |  |
|----------|----------------|--|--|---------------------------------------------------------------------|--|-------------------|--|
| Irene    | Alba-Alejandre |  |  | University Hospital, LMU Munich, Munich, Germany                    |  | Consortium member |  |
| Nikolaus | Haas           |  |  | University Hospital, LMU Munich,                                    |  | Consortium member |  |
| Esther   | Maier          |  |  | Dr. von Hauner Children's Hospital, University Hospital, LMU Munich |  | Consortium member |  |
| Sabrina  | Juranek        |  |  | Dr. von Hauner Children's Hospital, University Hospital, LMU Munich |  | Consortium member |  |
| Tobias   | Feuchtinger    |  |  | Dr. von Hauner Children's Hospital, University Hospital, LMU Munich |  | Consortium member |  |

v 02-22 20 of 22

#### Supplemental Online Content: Nonauthor Collaborators

\*First name, last name, and suffix (if applicable) are required and will appear in PubMed.

| <b>*First Name and Middle Initial(s)</b> | <b>*Last Name</b> | <b>*Suffix (eg, Jr, III)</b> | <b>Academic Degrees</b> | <b>Institution</b> | <b>Location (city, state/province, country)</b> | <b>Role or Contribution, eg, chair, principal investigator</b> | <b>Group (if more than 1 Group listed in the byline) and/or Subgroup (eg, Steering Committee)</b> |
|------------------------------------------|-------------------|------------------------------|-------------------------|--------------------|-------------------------------------------------|----------------------------------------------------------------|---------------------------------------------------------------------------------------------------|
| Katharina                                | Danhauser         |                              |                         | Dr. von Hauner     |                                                 | Consortium member                                              |                                                                                                   |

|           |          |  |                                                                                                                                                        |  |                   |  |
|-----------|----------|--|--------------------------------------------------------------------------------------------------------------------------------------------------------|--|-------------------|--|
| Matthias  | Griese   |  | Children's Hospital,<br>University Hospital,<br>LMU Munich<br>Dr. von Hauner Children's Hospital,<br>University Hospital,<br>LMU Munich                |  | Consortium member |  |
| Matthias  | Kappler  |  | Dr. von Hauner Children's Hospital,<br>University Hospital,<br>LMU Munich<br>Dr. von Hauner Children's Hospital,<br>University Hospital,<br>LMU Munich |  | Consortium member |  |
| Eberhard  | Lurz     |  | Dr. von Hauner Children's Hospital,<br>University Hospital,<br>LMU Munich                                                                              |  | Consortium member |  |
| Sebastian | Schroepf |  | Dr. von Hauner Children's Hospital,<br>University Hospital,<br>LMU Munich                                                                              |  | Consortium member |  |
| Florian   | Hoffmann |  | Dr. von Hauner Children's Hospital,<br>University Hospital,<br>LMU Munich                                                                              |  | Consortium member |  |
| Karl      | Reiter   |  | Dr. von Hauner Children's Hospital,<br>University Hospital,<br>LMU Munich                                                                              |  | Consortium member |  |
| Carola    | Schoen   |  | Dr. von Hauner Children's                                                                                                                              |  | Consortium member |  |

|           |                         |  |  |                                                                                              |  |                      |  |
|-----------|-------------------------|--|--|----------------------------------------------------------------------------------------------|--|----------------------|--|
|           |                         |  |  | Hospital,<br>University<br>Hospital,<br>LMU Munich                                           |  |                      |  |
| Philipp   | Agyeman                 |  |  | Bern<br>University<br>Hospital,<br>University of<br>Bern,<br>Switzerland                     |  | Consortium<br>member |  |
| Christoph | Aebi                    |  |  | Bern<br>University<br>Hospital,<br>University of<br>Bern,<br>Switzerland                     |  | Consortium<br>member |  |
| Luregn J  | Schlapbach              |  |  | University<br>Children`s<br>Hospital<br>Zurich                                               |  | Consortium<br>member |  |
| Eric      | Giannoni                |  |  | Lausanne<br>University<br>Hospital and<br>University of<br>Lausanne,<br>Switzerland          |  | Consortium<br>member |  |
| Martin    | Stocker                 |  |  | Children`s<br>Hospital<br>Lucerne,<br>Switzerland                                            |  | Consortium<br>member |  |
| Klara M   | Posfay-<br>Barbe        |  |  | Children`s<br>Hospital of<br>Geneva,<br>University<br>Hospitals of<br>Geneva,<br>Switzerland |  | Consortium<br>member |  |
| Ulrich    | Heininger               |  |  | University of<br>Basel<br>Children`s<br>Hospital,<br>Switzerland                             |  | Consortium<br>member |  |
| Sara      | Bernhard-<br>Stirnemann |  |  | Children`s<br>Hospital<br>Aarau,<br>Switzerland                                              |  | Consortium<br>member |  |
| Anita     | Niederer-<br>Loher      |  |  | Children`s<br>Hospital of<br>Eastern<br>Switzerland                                          |  | Consortium<br>member |  |

|           |         |  |  |                                                                                   |  |                      |  |
|-----------|---------|--|--|-----------------------------------------------------------------------------------|--|----------------------|--|
|           |         |  |  | St. Gallen,<br>Switzerland                                                        |  |                      |  |
| Christian | Kahlert |  |  | Children's<br>Hospital of<br>Eastern<br>Switzerland<br>St. Gallen,<br>Switzerland |  | Consortium<br>member |  |

v 02-22 21 of 22

#### Supplemental Online Content: Nonauthor Collaborators

\*First name, last name, and suffix (if applicable) are required and will appear in PubMed.

| <b>*First<br/>Name and<br/>Middle<br/>Initial(s)</b> | <b>*Last<br/>Name</b> | <b>*Suffix<br/>(eg, Jr,<br/>III)</b> | <b>Academic<br/>Degrees</b> | <b>Institution</b>                                                                                  | <b>Location (city,<br/>state/province,<br/>country)</b> | <b>Role or<br/>Contribution,<br/>eg, chair,<br/>principal<br/>investigator</b> | <b>Group (if more<br/>than 1 Group<br/>listed in the<br/>byline) and/or<br/>Subgroup (eg,<br/>Steering<br/>Committee)</b> |
|------------------------------------------------------|-----------------------|--------------------------------------|-----------------------------|-----------------------------------------------------------------------------------------------------|---------------------------------------------------------|--------------------------------------------------------------------------------|---------------------------------------------------------------------------------------------------------------------------|
| Giancarlo                                            | Natalucci             |                                      |                             | University<br>Hospital<br>Zurich,<br>Switzerland                                                    |                                                         | Consortium<br>member                                                           |                                                                                                                           |
| Christa                                              | Relly                 |                                      |                             | Children's<br>Research<br>Center,<br>University<br>Children's<br>Hospital<br>Zurich,<br>Switzerland |                                                         | Consortium<br>member                                                           |                                                                                                                           |
| Christoph                                            | Berger                |                                      |                             | Children's<br>Research<br>Center,<br>University<br>Children's<br>Hospital<br>Zurich,<br>Switzerland |                                                         | Consortium<br>member                                                           |                                                                                                                           |
| Thomas                                               | Riedel                |                                      |                             | Children's<br>Hospital Chur,<br>Switzerland                                                         |                                                         | Consortium<br>member                                                           |                                                                                                                           |

v 02-22 22 of 22
